# Supplementary material for: Minian, an open-source miniscope analysis pipeline
Source: eLife. 2022 Jun 1;11:e70661. doi: 10.7554/eLife.70661 (PMC9205633; doi:10.7554/eLife.70661)
Supplement: Figure 15—source data 1. [file elife-70661-fig15-data1.csv]

ncell	sig	pipeline	variable	value
100	0.2	CaImAn	Acorr	0.9959630533690847
100	0.2	Minian	Acorr	0.9907246860650004
300	0.2	CaImAn	Acorr	0.9944820678395249
300	0.2	Minian	Acorr	0.9880660388951037
500	0.2	CaImAn	Acorr	0.9905750823671111
500	0.2	Minian	Acorr	0.9861946545538749
100	0.4	CaImAn	Acorr	0.9979590269643732
100	0.4	Minian	Acorr	0.9895969757628529
300	0.4	CaImAn	Acorr	0.9910650428429547
300	0.4	Minian	Acorr	0.990470457341173
500	0.4	CaImAn	Acorr	0.9926469183114325
500	0.4	Minian	Acorr	0.9884740252188988
100	0.6	CaImAn	Acorr	0.9960389742329223
100	0.6	Minian	Acorr	0.9919666449795923
300	0.6	CaImAn	Acorr	0.993573891392832
300	0.6	Minian	Acorr	0.9922465237887896
500	0.6	CaImAn	Acorr	0.9914403142425304
500	0.6	Minian	Acorr	0.9901673966936756
100	1.0	CaImAn	Acorr	0.9922045198830383
100	1.0	Minian	Acorr	0.9943020504903806
300	1.0	CaImAn	Acorr	0.9911565265989178
300	1.0	Minian	Acorr	0.9945910820997934
500	1.0	CaImAn	Acorr	0.9917646148216029
500	1.0	Minian	Acorr	0.9923826281774236
100	1.4	CaImAn	Acorr	0.9913995314605898
100	1.4	Minian	Acorr	0.9951272608716124
300	1.4	CaImAn	Acorr	0.9922642552609953
300	1.4	Minian	Acorr	0.9946735224393365
500	1.4	CaImAn	Acorr	0.990781615535467
500	1.4	Minian	Acorr	0.9938212703391275
100	2.0	CaImAn	Acorr	0.9916137363075491
100	2.0	Minian	Acorr	0.9962974693180034
300	2.0	CaImAn	Acorr	0.9937854203154924
300	2.0	Minian	Acorr	0.9952520732790395
500	2.0	CaImAn	Acorr	0.9945770282702503
500	2.0	Minian	Acorr	0.9947605340473964
100	5.0	CaImAn	Acorr	0.993763947977537
100	5.0	Minian	Acorr	0.9968555300696685
300	5.0	CaImAn	Acorr	0.9898422277700654
300	5.0	Minian	Acorr	0.9958633203723913
500	5.0	CaImAn	Acorr	0.9909437205382128
500	5.0	Minian	Acorr	0.9951574741382351
100	8.0	CaImAn	Acorr	0.9901263019648314
100	8.0	Minian	Acorr	0.9971494373384336
300	8.0	CaImAn	Acorr	0.9945877866129951
300	8.0	Minian	Acorr	0.9967904565978004
500	8.0	CaImAn	Acorr	0.9898247034098021
500	8.0	Minian	Acorr	0.9955577617848582
100	0.2	CaImAn	Scorr	0.4540012409295906
100	0.2	Minian	Scorr	0.4878028723573419
300	0.2	CaImAn	Scorr	0.45298668669475783
300	0.2	Minian	Scorr	0.4991988296331894
500	0.2	CaImAn	Scorr	0.4458497404712282
500	0.2	Minian	Scorr	0.4923363596710446
100	0.4	CaImAn	Scorr	0.5145883528212978
100	0.4	Minian	Scorr	0.6957890092068196
300	0.4	CaImAn	Scorr	0.507673795498623
300	0.4	Minian	Scorr	0.6761540888775206
500	0.4	CaImAn	Scorr	0.5038332856710415
500	0.4	Minian	Scorr	0.6735193568406667
100	0.6	CaImAn	Scorr	0.5295212939226498
100	0.6	Minian	Scorr	0.8688353033394562
300	0.6	CaImAn	Scorr	0.5281347837153415
300	0.6	Minian	Scorr	0.8692595478264173
500	0.6	CaImAn	Scorr	0.524750238619487
500	0.6	Minian	Scorr	0.8564057639084113
100	1.0	CaImAn	Scorr	0.5412987051462214
100	1.0	Minian	Scorr	0.9672501878067777
300	1.0	CaImAn	Scorr	0.5382973634673542
300	1.0	Minian	Scorr	0.9638249036018531
500	1.0	CaImAn	Scorr	0.5335727920739324
500	1.0	Minian	Scorr	0.9591725006407558
100	1.4	CaImAn	Scorr	0.5477700233096634
100	1.4	Minian	Scorr	0.9818789384784441
300	1.4	CaImAn	Scorr	0.5405752639591355
300	1.4	Minian	Scorr	0.9805477924532803
500	1.4	CaImAn	Scorr	0.5388696645363544
500	1.4	Minian	Scorr	0.9736144225176568
100	2.0	CaImAn	Scorr	0.5484938091045862
100	2.0	Minian	Scorr	0.9871709107644441
300	2.0	CaImAn	Scorr	0.5444288583767486
300	2.0	Minian	Scorr	0.9827230292487033
500	2.0	CaImAn	Scorr	0.5433795607507507
500	2.0	Minian	Scorr	0.9781678732499224
100	5.0	CaImAn	Scorr	0.5483176340384424
100	5.0	Minian	Scorr	0.988348815786515
300	5.0	CaImAn	Scorr	0.5485992649478717
300	5.0	Minian	Scorr	0.9865125449443951
500	5.0	CaImAn	Scorr	0.5436644607409911
500	5.0	Minian	Scorr	0.9712736984608037
100	8.0	CaImAn	Scorr	0.5540881791758179
100	8.0	Minian	Scorr	0.9908074510501816
300	8.0	CaImAn	Scorr	0.5454094359056997
300	8.0	Minian	Scorr	0.9828280975020081
500	8.0	CaImAn	Scorr	0.545473384042842
500	8.0	Minian	Scorr	0.9818386098470075
100	0.2	CaImAn	Ccorr	0.922460070252481
100	0.2	Minian	Ccorr	0.857349873728664
300	0.2	CaImAn	Ccorr	0.9182117861382902
300	0.2	Minian	Ccorr	0.8641550579371952
500	0.2	CaImAn	Ccorr	0.915110619371105
500	0.2	Minian	Ccorr	0.8653481926184607
100	0.4	CaImAn	Ccorr	0.9759470846271903
100	0.4	Minian	Ccorr	0.9594623720243515
300	0.4	CaImAn	Ccorr	0.9715732205062657
300	0.4	Minian	Ccorr	0.9573896057611457
500	0.4	CaImAn	Ccorr	0.9684070418714753
500	0.4	Minian	Ccorr	0.9562347759739133
100	0.6	CaImAn	Ccorr	0.9845575340422769
100	0.6	Minian	Ccorr	0.9799199619828136
300	0.6	CaImAn	Ccorr	0.9826086549040676
300	0.6	Minian	Ccorr	0.9779453876406656
500	0.6	CaImAn	Ccorr	0.9793180423799142
500	0.6	Minian	Ccorr	0.976802431776503
100	1.0	CaImAn	Ccorr	0.9907409204322948
100	1.0	Minian	Ccorr	0.9914487476545168
300	1.0	CaImAn	Ccorr	0.9879515230859681
300	1.0	Minian	Ccorr	0.9904061760409553
500	1.0	CaImAn	Ccorr	0.9854961637676979
500	1.0	Minian	Ccorr	0.9888689630449508
100	1.4	CaImAn	Ccorr	0.9917996621304406
100	1.4	Minian	Ccorr	0.9944053446212188
300	1.4	CaImAn	Ccorr	0.98813287108941
300	1.4	Minian	Ccorr	0.9937430636199567
500	1.4	CaImAn	Ccorr	0.9866864834856637
500	1.4	Minian	Ccorr	0.9932325666176351
100	2.0	CaImAn	Ccorr	0.9923492402622474
100	2.0	Minian	Ccorr	0.9968705858225863
300	2.0	CaImAn	Ccorr	0.9887142703715052
300	2.0	Minian	Ccorr	0.9961034456198823
500	2.0	CaImAn	Ccorr	0.9873606306285333
500	2.0	Minian	Ccorr	0.9955330508015259
100	5.0	CaImAn	Ccorr	0.9932907166112613
100	5.0	Minian	Ccorr	0.9987677268067169
300	5.0	CaImAn	Ccorr	0.9901750796808888
300	5.0	Minian	Ccorr	0.9985273759256772
500	5.0	CaImAn	Ccorr	0.9870171058310848
500	5.0	Minian	Ccorr	0.9978749676838768
100	8.0	CaImAn	Ccorr	0.9934582867171189
100	8.0	Minian	Ccorr	0.9989614523280247
300	8.0	CaImAn	Ccorr	0.9896390713113525
300	8.0	Minian	Ccorr	0.9988010241191554
500	8.0	CaImAn	Ccorr	0.986466007992165
500	8.0	Minian	Ccorr	0.9983489230289571
100	0.2	CaImAn	f1	0.9847715736040609
100	0.2	Minian	f1	0.9405940594059405
300	0.2	CaImAn	f1	0.9726027397260273
300	0.2	Minian	f1	0.9466437177280551
500	0.2	CaImAn	f1	0.9615784008307372
500	0.2	Minian	f1	0.9553478712357217
100	0.4	CaImAn	f1	0.98989898989899
100	0.4	Minian	f1	0.9801980198019802
300	0.4	CaImAn	f1	0.9655172413793104
300	0.4	Minian	f1	0.9655172413793104
500	0.4	CaImAn	f1	0.9583333333333334
500	0.4	Minian	f1	0.9442691903259727
100	0.6	CaImAn	f1	0.9795918367346939
100	0.6	Minian	f1	0.9795918367346939
300	0.6	CaImAn	f1	0.9619377162629758
300	0.6	Minian	f1	0.9619377162629758
500	0.6	CaImAn	f1	0.9094874591057797
500	0.6	Minian	f1	0.9304812834224598
100	1.0	CaImAn	f1	0.9949748743718593
100	1.0	Minian	f1	0.9949748743718593
300	1.0	CaImAn	f1	0.9619377162629758
300	1.0	Minian	f1	0.9637305699481865
500	1.0	CaImAn	f1	0.9373007438894793
500	1.0	Minian	f1	0.924892703862661
100	1.4	CaImAn	f1	0.9847715736040609
100	1.4	Minian	f1	0.9795918367346939
300	1.4	CaImAn	f1	0.9547038327526133
300	1.4	Minian	f1	0.9492119089316988
500	1.4	CaImAn	f1	0.9395546129374337
500	1.4	Minian	f1	0.9417989417989417
100	2.0	CaImAn	f1	0.98989898989899
100	2.0	Minian	f1	0.9743589743589743
300	2.0	CaImAn	f1	0.9778534923339013
300	2.0	Minian	f1	0.9637305699481865
500	2.0	CaImAn	f1	0.9517819706498952
500	2.0	Minian	f1	0.9384288747346072
100	5.0	CaImAn	f1	0.98989898989899
100	5.0	Minian	f1	0.9847715736040609
300	5.0	CaImAn	f1	0.9778534923339013
300	5.0	Minian	f1	0.9601386481802426
500	5.0	CaImAn	f1	0.9451476793248946
500	5.0	Minian	f1	0.931769722814499
100	8.0	CaImAn	f1	1.0
100	8.0	Minian	f1	0.9949748743718593
300	8.0	CaImAn	f1	0.969283276450512
300	8.0	Minian	f1	0.9510489510489509
500	8.0	CaImAn	f1	0.9479166666666667
500	8.0	Minian	f1	0.939936775553214
