# Supplementary material for: Minian, an open-source miniscope analysis pipeline
Source: eLife. 2022 Jun 1;11:e70661. doi: 10.7554/eLife.70661 (PMC9205633; doi:10.7554/eLife.70661)
Supplement: Figure 16—source data 1. [file elife-70661-fig16-data1.csv]

uidA	uidB	dist	Acorr	Scorr	Ccorr	sig	ncell	pipeline
0	37	0.4017638606111629	0.9958812383113264	0.876252183996909	0.9785098635954343	0.6	100	minian
2	89	0.13957799554709044	0.9938991524372974	0.8483776771940171	0.9846980963952044	0.6	100	minian
3	47	2.5278908608978963	0.9228373182145879	0.6989515751322236	0.7616732920624856	0.6	100	minian
5	87	0.10373737721583697	0.9959982856665174	0.8342557487271449	0.9828394370191869	0.6	100	minian
6	8	0.32356774647307285	0.9873704775402217	0.8696559265409268	0.9816238447096548	0.6	100	minian
7	72	0.08483095133622762	0.9958069762310452	0.879901176005708	0.9761725224401646	0.6	100	minian
8	92	0.12209189978284529	0.9978680365454009	0.8765672565673062	0.9831390019365844	0.6	100	minian
9	26	0.39075325233066704	0.9912247234415738	0.8358497553688893	0.9802588644486768	0.6	100	minian
10	64	0.3824833387806212	0.9920261848727212	0.8834334357276654	0.9752218402339757	0.6	100	minian
11	74	0.19805131261421854	0.9958951348025699	0.8742478193049964	0.9640665336525748	0.6	100	minian
12	50	0.4159203761480008	0.9964248985029566	0.8868582332414515	0.9733574804403231	0.6	100	minian
13	25	0.4795041605890966	0.9936770715334114	0.8508157248257553	0.9778056525602145	0.6	100	minian
14	31	1.5096849637958634	0.9648580564634187	0.8507567271943758	0.9186244212380476	0.6	100	minian
15	33	0.45711162798546406	0.9914736412898172	0.8737999873726958	0.9813942512093021	0.6	100	minian
16	27	0.650814945171986	0.9836726690215086	0.8615396429356081	0.9862156859694493	0.6	100	minian
17	94	0.18154027303284143	0.9981005274015522	0.9470293891552221	0.9829944221796412	0.6	100	minian
18	84	0.3316779761314053	0.9901692349002563	0.8517444546625346	0.9667888580014631	0.6	100	minian
19	23	0.5066297851897922	0.9911774595075111	0.8503891941347701	0.9728958767845645	0.6	100	minian
20	56	0.2689684893987873	0.9922881711145282	0.7402609661028304	0.9822193033779009	0.6	100	minian
21	52	0.5243120652393696	0.9884245515935097	0.9030075228784222	0.9804725052517594	0.6	100	minian
22	80	0.335740597622192	0.9914330980834883	0.8916449255018333	0.9773164843643606	0.6	100	minian
23	54	0.3839189343115254	0.9938113055963531	0.8294381133621538	0.9729053222917087	0.6	100	minian
24	41	0.4038371126806687	0.9911597564727276	0.9261105226190046	0.9692362173329189	0.6	100	minian
25	63	0.5669500868562605	0.9837416022078033	0.7831979894155441	0.9770640380218554	0.6	100	minian
26	9	0.1793884618236177	0.9922193047124501	0.8994095048299733	0.9860860857479856	0.6	100	minian
27	55	0.48070711341183137	0.993897304729494	0.8975737023700102	0.9778878465206089	0.6	100	minian
28	16	0.31811576697261057	0.9934275620613738	0.9121917054542014	0.9882903192077331	0.6	100	minian
29	35	0.5784819830004954	0.9898128844423162	0.8792535461154993	0.9730497376809223	0.6	100	minian
30	43	0.46909488495818213	0.9865832649976646	0.872104787517813	0.9727431482881842	0.6	100	minian
31	77	0.6197875106056868	0.976073614605312	0.8208891592132199	0.9563835542317781	0.6	100	minian
32	93	0.16435667110650637	0.994981193468373	0.8662527967550324	0.9901959780180745	0.6	100	minian
33	83	0.16840426943103246	0.9951163982326305	0.9155999981748073	0.9773088213115153	0.6	100	minian
34	12	0.451181176648498	0.9877532185851977	0.8686293563306766	0.9810870823485834	0.6	100	minian
35	2	0.2808180203321394	0.9944129690940323	0.8009590732183207	0.9903441251028516	0.6	100	minian
36	36	0.4482978735759114	0.993683987052413	0.895138286844802	0.981924322698392	0.6	100	minian
37	10	0.28331618364047473	0.9972805647830287	0.8810825502861614	0.9873442703199443	0.6	100	minian
38	0	0.6355564304436365	0.981857363173454	0.8367739875499033	0.9713318894381585	0.6	100	minian
39	68	0.3690654106289998	0.9927330224044041	0.9387619486835844	0.9805775529818228	0.6	100	minian
40	29	0.5296380005489175	0.985706067093483	0.8507103271856863	0.9873050319596576	0.6	100	minian
41	85	0.6323929933860738	0.9772765194376285	0.8839598001026506	0.9684557319981426	0.6	100	minian
42	38	0.22063515764996797	0.997138443256631	0.8824722842264165	0.981071131492869	0.6	100	minian
43	67	0.5502695126007353	0.9876622479146122	0.8658726045196735	0.9775616008074346	0.6	100	minian
44	82	0.2664326572078437	0.9904869292355304	0.8715854580129843	0.9770323347051458	0.6	100	minian
45	70	0.868363412328378	0.9795599845315792	0.8895873857721159	0.9556233361260037	0.6	100	minian
46	17	0.6450933493806819	0.992745985160481	0.871626079452713	0.9765710331565959	0.6	100	minian
47	34	0.18461956318853248	0.9856925158998249	0.9183946828829587	0.9772853178890145	0.6	100	minian
48	15	0.2810831612691101	0.9934042715294871	0.6816391219777063	0.9851436339536677	0.6	100	minian
49	18	0.06581229770490545	0.9990625315503796	0.801504273814909	0.9810702962051288	0.6	100	minian
50	5	0.23962560913788938	0.9977014192948931	0.8097618106672652	0.9840295791628837	0.6	100	minian
51	11	0.49977947145204776	0.9935383433737994	0.9163089366925455	0.9744051203502795	0.6	100	minian
52	4	0.21905090111481515	0.9977758380334707	0.9097427356943816	0.9932626654204422	0.6	100	minian
53	65	0.30815090981425736	0.9961643904412486	0.8042365880005613	0.983086352690737	0.6	100	minian
54	51	0.32070995837952654	0.9968217398416984	0.8206696923419832	0.9853511057965297	0.6	100	minian
55	86	0.36753572054939465	0.9909896501828014	0.8311275241889658	0.9696245416684114	0.6	100	minian
56	78	0.2869817224647698	0.9950826103420096	0.8335932385406755	0.9799287780325219	0.6	100	minian
57	58	0.35949640841686864	0.994502686097624	0.8577824574064258	0.9789960276923559	0.6	100	minian
58	79	0.3744730790852771	0.9896403569897667	0.8122947317626186	0.972950159249554	0.6	100	minian
59	20	0.4689391149836172	0.9926551661935712	0.859037678287986	0.9891065177258961	0.6	100	minian
60	76	0.3949563236565421	0.9863566430247068	0.8539156310942624	0.9681341468203323	0.6	100	minian
61	40	0.5410678457726636	0.9903846104999953	0.8881847162994755	0.9826254479380632	0.6	100	minian
62	69	0.49064308292495706	0.9924912672652584	0.9046868005682922	0.9715149812667784	0.6	100	minian
63	45	0.2475464972397618	0.9918562620069814	0.8566555291662642	0.9815306729438061	0.6	100	minian
64	6	0.44180050407103805	0.9934008564293226	0.8175750942317926	0.9840630903808539	0.6	100	minian
65	1	0.7052530697220142	0.988078580168178	0.897756397503314	0.9769864319356351	0.6	100	minian
66	62	0.46438996092756035	0.9919071050864633	0.9487680510072253	0.9871241899862244	0.6	100	minian
67	44	0.4645424301741665	0.9869397052886913	0.8456653872492284	0.9809218562630198	0.6	100	minian
68	13	0.37132435280763904	0.9912919138705736	0.7723687655756534	0.9806445907271614	0.6	100	minian
69	60	0.46947114216786	0.983760561508747	0.8435502797335966	0.9797901048555067	0.6	100	minian
70	90	0.494007668326631	0.9847659463234563	0.8924041808345217	0.9772465214149211	0.6	100	minian
71	49	0.16119590730979122	0.9945311690584889	0.84613486394727	0.9863569018098787	0.6	100	minian
72	14	0.14893667990903017	0.9968069015097342	0.8518938127609985	0.9874066251475792	0.6	100	minian
73	71	0.44646878882365926	0.9865958333235625	0.85082843492103	0.9768089963597311	0.6	100	minian
74	32	0.1048812897677895	0.9916249172246838	0.8215404756667515	0.9685089793887118	0.6	100	minian
75	22	0.31144786487340975	0.993729183039365	0.928900923752582	0.9803721777747345	0.6	100	minian
76	88	0.18635071803129583	0.9896913159344941	0.8772846189330689	0.9757917353403035	0.6	100	minian
77	21	0.2747510490017662	0.9960370484081611	0.8690412503482358	0.9807184780882945	0.6	100	minian
78	81	0.24311737340305742	0.9891072607722646	0.8822735938312688	0.9820237478639922	0.6	100	minian
79	24	0.6041372432259852	0.9895651758304823	0.8391263085855	0.9816719143195253	0.6	100	minian
80	73	0.3694135019279498	0.9972930477819235	0.8310538058271759	0.9607366579729993	0.6	100	minian
81	42	0.28726926521190144	0.9945271196726637	0.8841773604393632	0.9868951633853028	0.6	100	minian
82	53	0.32951232557394783	0.9957504257034665	0.9279372423018896	0.9802774999124391	0.6	100	minian
83	57	0.1323355000252716	0.9959202222980053	0.8993839680263234	0.9892358979630209	0.6	100	minian
84	3	0.6378833315908451	0.9860459236427542	0.7527988731727621	0.7736256007344579	0.6	100	minian
85	91	0.464535132675228	0.9939824781833698	0.8883094554503369	0.9707822823441643	0.6	100	minian
86	48	0.07786535331559276	0.995556155084089	0.8389524213223468	0.9847169649255841	0.6	100	minian
87	66	0.49479003682624856	0.986852874673122	0.8621925218639906	0.977672967788175	0.6	100	minian
88	19	0.25611097335099564	0.9857668791425914	0.6204557186811848	0.7461551193558155	0.6	100	minian
90	61	0.6135110802907613	0.9821877378405725	0.8920867838196775	0.9830812756669091	0.6	100	minian
92	59	0.5880986840066829	0.9857709388503941	0.8693325527784047	0.9632146939975664	0.6	100	minian
93	75	0.28390106323325354	0.9863613445747292	0.8666939615072188	0.9696893319994451	0.6	100	minian
94	7	0.546162609935555	0.9907011587066146	0.8902284596501444	0.9868006143008667	0.6	100	minian
95	30	0.17904700365607715	0.9962913828286749	0.8463077126902709	0.9729260068778317	0.6	100	minian
96	28	0.5943729085718714	0.9866774846265092	0.8478337322667495	0.9768879493186879	0.6	100	minian
97	39	0.26971344118865986	0.9891541060323873	0.927319580326567	0.9799111459331052	0.6	100	minian
98	95	0.20389747693075294	0.9979862923545524	0.9221928390554426	0.9854564570492389	0.6	100	minian
99	46	0.2756241464784362	0.9922211216272332	0.9355431016633184	0.9835433894849267	0.6	100	minian
0	130	0.1803834406057363	0.9967108102403132	0.8300446685554012	0.986083436693552	0.6	300	minian
1	81	0.09103604259363636	0.9978153169014747	0.9139154339155803	0.9851058334657048	0.6	300	minian
2	185	3.018627998268153	0.8911213123270258	0.5526474296364341	0.6802281490660844	0.6	300	minian
3	16	0.16149589273849427	0.9913231793549597	0.9048838550761272	0.9788386935311957	0.6	300	minian
4	151	0.38079219901016864	0.9938087710040995	0.8008233471933314	0.9770795138710106	0.6	300	minian
5	189	0.5634026120837501	0.9787964815062714	0.8256150853185279	0.976958319473624	0.6	300	minian
6	276	0.5329652320393731	0.990006647583732	0.8660876124552706	0.9812322791335656	0.6	300	minian
7	22	0.11478517357908609	0.9888332664911307	0.8876845296848535	0.9775681963069491	0.6	300	minian
8	231	0.2596129590104653	0.9941588170488973	0.8920807170241097	0.9794574622209504	0.6	300	minian
9	75	0.16795167240019898	0.9929876259355707	0.8019387214385888	0.9833830302253023	0.6	300	minian
11	179	0.21035260082603582	0.9968378236660288	0.8807263522183185	0.9865133187678808	0.6	300	minian
12	23	0.19382769405917963	0.9944721397378565	0.9085258039208397	0.9819504979901369	0.6	300	minian
13	200	0.4188879435617875	0.9890742001640735	0.9099400584224967	0.9837079540893977	0.6	300	minian
14	253	0.31617601499682235	0.9944011096430858	0.8439988379368142	0.9762522581571578	0.6	300	minian
15	214	0.5270845684875882	0.987587713556619	0.8215612920255883	0.9762187065683128	0.6	300	minian
16	121	0.5884561125128777	0.9841592236342094	0.8422397435537624	0.9620021056175787	0.6	300	minian
17	217	0.06635591405935799	0.995215446751369	0.8871051445992152	0.9811924672405643	0.6	300	minian
18	63	0.4318894855296195	0.9917198210222978	0.8187731456779266	0.9775797183856866	0.6	300	minian
19	249	0.4050684196946486	0.9927158718568383	0.8853931768144819	0.9838008918145296	0.6	300	minian
20	0	0.41575743791334	0.9891535828859642	0.8332838597008511	0.9691753559568179	0.6	300	minian
21	64	0.3307933073639009	0.9795027470554145	0.8846709597728167	0.9740886602577106	0.6	300	minian
22	21	0.4442276384807375	0.9920851427657196	0.8751059071535112	0.9811925495243156	0.6	300	minian
24	229	0.35566341459599604	0.9953434632291379	0.882220271436066	0.966314496252316	0.6	300	minian
25	52	0.4002522432070836	0.9928657518493906	0.8354607719733985	0.9642350884773916	0.6	300	minian
26	275	2.3947128375893816	0.9160959251784353	0.7086887076988989	0.8114632957041639	0.6	300	minian
27	1	0.0974711651721892	0.9968827499890358	0.7289712337464515	0.9890769889730269	0.6	300	minian
28	145	0.45383813868387973	0.9939807052163523	0.8791174186371038	0.9874450158931968	0.6	300	minian
29	91	0.14752349759626465	0.993561208972848	0.8877696635405355	0.9846797801283137	0.6	300	minian
30	195	0.242543034965182	0.997034168924602	0.8224649805956132	0.9855550617489718	0.6	300	minian
31	33	0.34138720500530567	0.9808094741868492	0.9463259208974425	0.9813813785321684	0.6	300	minian
32	277	0.521639444753537	0.9882622292105923	0.819010871756691	0.9736870342778321	0.6	300	minian
33	127	0.4191717443202249	0.9881635736394139	0.7806616132388193	0.9724030723065622	0.6	300	minian
34	46	0.07649018558561196	0.9910956791224624	0.9210688088942656	0.9710448870800538	0.6	300	minian
35	105	0.26232542081031385	0.9922948567119433	0.8766134037760676	0.9811457111393506	0.6	300	minian
36	18	0.2883150136290424	0.9939728586751314	0.9119333711156592	0.9758834436333617	0.6	300	minian
37	196	0.21163143779787477	0.9957960026145208	0.8208360503930768	0.9801736820250825	0.6	300	minian
38	193	0.2413723086305694	0.9938900957017915	0.9503329397646111	0.9844263639951797	0.6	300	minian
39	59	0.37638587966167886	0.9898880387390271	0.908862456634186	0.9858094968287447	0.6	300	minian
40	83	0.3194885893662666	0.9888101806690075	0.8442296628750964	0.9866621700452648	0.6	300	minian
41	244	0.22568732670612118	0.993742639070851	0.8943844041652917	0.9776196617169681	0.6	300	minian
42	186	0.5722709215392431	0.9744541191806694	0.6588117729089441	0.8467992223748824	0.6	300	minian
43	135	0.4663863890142434	0.991765977084624	0.9079897731556017	0.9763296562380434	0.6	300	minian
45	161	0.27954394714261455	0.9945959610723427	0.7814846663132092	0.9770993905229572	0.6	300	minian
46	54	0.37656957921271283	0.9920373878132924	0.8531273559855274	0.9808391411490093	0.6	300	minian
47	5	0.7362105920981514	0.9792362821434322	0.8764725975229499	0.9689890970368289	0.6	300	minian
48	227	0.45008924578640563	0.9905346557927853	0.8362197294734116	0.982271195147859	0.6	300	minian
49	77	0.22088180107213043	0.9943214238865992	0.9102212861000651	0.9841201603228295	0.6	300	minian
50	160	1.9781688469877399	0.9331806269239334	0.6499034820892602	0.6585222068797375	0.6	300	minian
51	271	0.42892354600607385	0.9902872619411308	0.8221044882839822	0.9680676063523489	0.6	300	minian
52	239	0.425441392572034	0.9895935398084369	0.8552513920605855	0.9755689136440641	0.6	300	minian
53	140	0.32586554576529597	0.9951926397795601	0.8455267313582067	0.9893507532280332	0.6	300	minian
54	220	0.5183047210094641	0.9957858467869021	0.9376382936103441	0.9643976688986059	0.6	300	minian
55	39	0.3391518209180579	0.9965072090347133	0.8627849651520497	0.9857572040873638	0.6	300	minian
56	211	0.35710411642656414	0.996395411849778	0.8605096157099535	0.979189141286493	0.6	300	minian
57	6	0.549790369343982	0.9876158948108802	0.8825705879430918	0.9847322320843999	0.6	300	minian
58	82	0.5389640420545289	0.9855863052006438	0.9375882100470957	0.9769078330295862	0.6	300	minian
59	233	0.4578484342978342	0.9823303883113177	0.8720881683477703	0.9750623213729998	0.6	300	minian
60	197	0.22199176516962343	0.9970014575865598	0.9095125650428348	0.9695432605812175	0.6	300	minian
61	235	0.436840558869995	0.9891034040079362	0.8538636476396282	0.9819574048967532	0.6	300	minian
62	247	1.4788722536831225	0.9311984727638123	0.7654924092159066	0.7762919251588983	0.6	300	minian
63	168	0.09716168465029457	0.9950443835586876	0.8515126579974789	0.9810213794402466	0.6	300	minian
64	108	0.36486765894358264	0.9942250823378436	0.8961994121951703	0.9854647379885806	0.6	300	minian
65	132	0.07756109743628474	0.9934008865835147	0.87932283121366	0.9778395061438971	0.6	300	minian
66	99	0.4507163462517574	0.9848231447758429	0.903675464659945	0.974671979322207	0.6	300	minian
67	8	0.6802645499970887	0.9761144937615199	0.9367480265797512	0.9706409841877089	0.6	300	minian
68	251	0.5695628436520902	0.9913689876190478	0.8009122611368634	0.960397444911716	0.6	300	minian
69	11	0.5784132371286593	0.9721816028162836	0.8773109598943091	0.9745364361326563	0.6	300	minian
70	87	0.23628946072778875	0.9928590280655147	0.8884629402896561	0.9804976913118272	0.6	300	minian
71	79	0.19000743717428828	0.9940623135357227	0.8103104281939875	0.9730006706918698	0.6	300	minian
72	31	0.5411735160989127	0.9899549608248972	0.8358200672505557	0.9640332274492133	0.6	300	minian
74	264	0.4819805881379945	0.9910688422441462	0.8456200732691933	0.9683153761186357	0.6	300	minian
75	53	0.40442292574066946	0.9911833692410136	0.89157755791085	0.9791113637622234	0.6	300	minian
76	257	0.557450199615863	0.9796961953027526	0.8659987198123783	0.9740608469181756	0.6	300	minian
77	169	0.37596944680890937	0.9863387442315084	0.8892316978275401	0.9707401794726036	0.6	300	minian
78	129	2.8298376575478104	0.9009813918133164	0.6648834329385175	0.7511084847245029	0.6	300	minian
79	128	0.4582491347431181	0.9887302598046519	0.8741062902737845	0.9648508271136416	0.6	300	minian
80	35	0.16876755934971496	0.9968805417241174	0.8249109703937061	0.9696086789496645	0.6	300	minian
81	115	0.14572479663095225	0.9976562299452193	0.8250153123039553	0.9865521489971473	0.6	300	minian
82	36	0.3005726964978235	0.9907741140534427	0.8753552314257733	0.9800544438926686	0.6	300	minian
83	139	0.1893100628030528	0.9953519315774945	0.827832778585516	0.9838455643067895	0.6	300	minian
85	107	0.2133054255867606	0.9924898406952307	0.8802804314688103	0.9836000576479588	0.6	300	minian
86	171	0.5285247775525332	0.9808135040800126	0.7482001007177491	0.966057237505281	0.6	300	minian
88	202	0.428796169940106	0.9951251963410584	0.911247991974544	0.9840807798771235	0.6	300	minian
89	205	0.30603884214831234	0.9928258289823552	0.8566283647678903	0.9780341359615975	0.6	300	minian
90	164	0.19847924993929422	0.9963028384769749	0.8020818199045799	0.9826792569815166	0.6	300	minian
91	109	0.2051579789825589	0.9926299106333883	0.8503757478293525	0.979601128120918	0.6	300	minian
92	260	0.5511512629382541	0.9911403796095298	0.850175652707901	0.9771371667021654	0.6	300	minian
93	48	0.13287571516950392	0.9972515900794877	0.9236341538310912	0.9762759886517027	0.6	300	minian
94	266	0.6933146583566259	0.9862098474216909	0.8939201105181218	0.9885540728990824	0.6	300	minian
95	225	0.538261564387214	0.9913466302363618	0.9147374582420685	0.9736362868158306	0.6	300	minian
96	98	0.11073484232803248	0.9934292521249007	0.6949870590582721	0.9824661155887293	0.6	300	minian
97	103	1.8627539525456334	0.9330989742957706	0.6244415972454166	0.7341344977692966	0.6	300	minian
98	163	0.2670252615553779	0.9954553456627155	0.8727209384848271	0.9814763265133828	0.6	300	minian
99	89	0.11893913640525851	0.9969445632492734	0.7637887574441737	0.9761914788123155	0.6	300	minian
100	156	0.13880450970792868	0.9928216252372744	0.8907002747568156	0.9781637454945507	0.6	300	minian
101	15	0.7018724262693065	0.9783050221984471	0.8840705765903855	0.9749009022231724	0.6	300	minian
102	92	0.27298829891944965	0.9950388282773978	0.8411613503626965	0.9810576415520873	0.6	300	minian
103	175	0.33176555396720253	0.9961541631384749	0.9252076719985264	0.9821778358820316	0.6	300	minian
104	9	0.03878937380366984	0.9941241380028525	0.835589441377698	0.9817318418385791	0.6	300	minian
105	210	0.12778994222417744	0.9972461468394266	0.8538888004314814	0.9784977657325244	0.6	300	minian
106	55	0.19961059955844157	0.9980294938429642	0.7999967610578322	0.9690549160750762	0.6	300	minian
107	58	0.23313963386394143	0.9927084912930222	0.8622265772174421	0.9820195372091919	0.6	300	minian
108	236	0.3313031042499473	0.9927851824530026	0.8529971852413099	0.9836952526425273	0.6	300	minian
109	177	0.23163730733502	0.9905099690747622	0.8374939126730172	0.970508525118261	0.6	300	minian
110	70	0.4386099729016463	0.9725062220427754	0.8422362544859606	0.971033666525243	0.6	300	minian
113	90	0.39897826155217186	0.9892336458247847	0.8570962795062104	0.9807533803362595	0.6	300	minian
114	190	0.03385100211434796	0.9871178441134975	0.943584201587302	0.9741833198085214	0.6	300	minian
115	167	0.04817670817484216	0.9947870925905743	0.8643795904310021	0.9900727685115519	0.6	300	minian
116	254	0.5116621183895572	0.9897913130908637	0.8983310058714076	0.9810315456038146	0.6	300	minian
117	57	0.3216854074768838	0.9933847196368883	0.9275599271100617	0.9854012770666639	0.6	300	minian
118	131	0.15816911372057466	0.996769813187294	0.9473102965938509	0.985290772190615	0.6	300	minian
119	147	0.1542664721596883	0.9931618434244941	0.8918262547614636	0.9827477200268947	0.6	300	minian
120	224	0.19474774048022378	0.9957625594939565	0.8984028936414165	0.9850584710008562	0.6	300	minian
121	272	0.714357907772413	0.9804770814752742	0.8352770795148945	0.9777300585561757	0.6	300	minian
123	174	0.10697637414297942	0.9884299954465169	0.9196845365993399	0.9759896867721305	0.6	300	minian
124	78	0.1805473680271745	0.9973268774167258	0.8245404731145507	0.9861985642746569	0.6	300	minian
125	20	0.19377089295079636	0.9943196251289831	0.8733129901068862	0.9811425483081081	0.6	300	minian
126	61	0.2648556245235763	0.992134135666498	0.9146676016241791	0.9824028254226231	0.6	300	minian
127	208	2.005858782516826	0.9295961445333321	0.8107233400064947	0.8214631373479441	0.6	300	minian
128	194	0.32371599105666643	0.9886124742573167	0.837201679700313	0.9780820180710182	0.6	300	minian
129	110	0.4231286293314162	0.9897090734400447	0.8815479732301919	0.9854622173089825	0.6	300	minian
130	265	0.39818930339195663	0.995241059343916	0.8821803268818759	0.9827684995217092	0.6	300	minian
131	10	0.2731442071989542	0.9929327451117984	0.8423268615147151	0.966287670439448	0.6	300	minian
132	123	0.46789579588586805	0.9838183903250731	0.8070672072335615	0.9655091814945445	0.6	300	minian
133	212	0.6664248137570654	0.9878489376917774	0.8881590904821427	0.9753446725087503	0.6	300	minian
134	173	0.08811346989657627	0.9972098465934826	0.9304800845956144	0.991990971679189	0.6	300	minian
135	148	0.44407611310381384	0.9864226937466436	0.9212071924614014	0.9801752035721596	0.6	300	minian
136	49	0.6576590284587204	0.9783527593408027	0.951632016814629	0.9762248833120688	0.6	300	minian
137	258	0.3730977935162952	0.992198190865636	0.8285897150437386	0.974634508719974	0.6	300	minian
138	204	0.14859237648431337	0.9873168051606009	0.7721730497763246	0.9705386042109746	0.6	300	minian
139	102	0.13242662724223678	0.9976792567321471	0.8821889299691877	0.967029306141418	0.6	300	minian
140	184	0.21267265676818214	0.9978395990429659	0.8756585669484372	0.9708352639469594	0.6	300	minian
141	273	0.6505683526945281	0.9852377807599766	0.8636409053122994	0.9863678689151139	0.6	300	minian
142	12	0.39477456105016373	0.9901040409387873	0.8101031360940532	0.9651152892270833	0.6	300	minian
144	181	0.2044180250010725	0.9953753170380122	0.869123438668004	0.9799112216237912	0.6	300	minian
145	97	0.1705421515996739	0.9955236239850849	0.854568578477732	0.9782985942590919	0.6	300	minian
146	19	0.15486969061028996	0.9973743124906492	0.8891986244571339	0.968849982408274	0.6	300	minian
147	178	0.2950180457425837	0.991700110178953	0.7842639102459925	0.9634723474456538	0.6	300	minian
148	2	0.3113573501078198	0.9931832949211388	0.8423224445952433	0.9852642337801404	0.6	300	minian
149	191	0.1435797004646522	0.9966584544633601	0.8328226128677862	0.9829544557684037	0.6	300	minian
150	252	2.2655203179265593	0.9202765760989164	0.6354755225337748	0.6798756140867143	0.6	300	minian
151	241	0.3764058989929366	0.9943857097145428	0.8410489948864924	0.9845459084056158	0.6	300	minian
152	238	0.45880721654088885	0.9908305969626262	0.9153797942598179	0.9770559705043989	0.6	300	minian
153	138	0.1796713638750602	0.9924763324412086	0.8517304498453877	0.9795799268285604	0.6	300	minian
154	270	0.325777168061498	0.9969973469764137	0.8170893673830281	0.9879719804982909	0.6	300	minian
155	125	0.38531689482325665	0.9928360100604011	0.9147199512699479	0.9744304783171842	0.6	300	minian
156	157	0.2530029123000827	0.9848567126795175	0.8264606619045851	0.9766393404155796	0.6	300	minian
157	24	0.24275189339736472	0.9935457303067189	0.8139747064653363	0.9755532458946259	0.6	300	minian
159	142	0.3638804753213642	0.9911660730796971	0.8817164759407959	0.9932429900337815	0.6	300	minian
160	124	1.4002159539658467	0.9465111433964609	0.7275581904009811	0.7757661154338136	0.6	300	minian
161	219	0.5284814902663394	0.9796580167763554	0.8733847762673642	0.9691734034459174	0.6	300	minian
162	198	0.2194031438774885	0.9900795407029824	0.9470037592245943	0.9852591690333681	0.6	300	minian
163	30	0.1654466831031514	0.998238304700977	0.8277940527852761	0.9725771812958199	0.6	300	minian
164	29	0.6414937899695714	0.9773820680566686	0.8972161631178769	0.9707672106663993	0.6	300	minian
165	14	0.8261570874910766	0.9774048177619968	0.7775450854568583	0.8650187102210265	0.6	300	minian
168	7	0.38695002920266675	0.9923603095289824	0.8699378734579523	0.9815817277500669	0.6	300	minian
169	76	0.043379228597412625	0.9988546528910581	0.731826150309821	0.9814951236469711	0.6	300	minian
170	41	0.5637862324283371	0.9932194439904388	0.9355871285507836	0.9808067741785936	0.6	300	minian
171	146	0.22285030202334513	0.9929957419995263	0.854948312448467	0.9839092815228873	0.6	300	minian
172	159	0.41721808717709175	0.9930818542102948	0.8780300811877135	0.9860654924039017	0.6	300	minian
173	182	0.16420606207406943	0.9903813286034031	0.8975011517024226	0.9792764183456579	0.6	300	minian
174	126	0.08623203911452726	0.9932431453348959	0.8758689739810739	0.9750974489519304	0.6	300	minian
175	133	0.3977653221306609	0.992327085640428	0.8820469141491732	0.9700182445308941	0.6	300	minian
176	232	0.7743808321178942	0.9829226336315434	0.8688376101739506	0.9772956990385672	0.6	300	minian
177	95	0.4543880827551255	0.9935445712044892	0.9192645427558981	0.9841415877042828	0.6	300	minian
178	149	0.23483814384523044	0.996324753967701	0.8731597769537142	0.9898373921258675	0.6	300	minian
179	242	0.23109651597511882	0.9966533461141028	0.888967533481321	0.9893847940460667	0.6	300	minian
180	188	0.23739955103521007	0.9966557585590087	0.8227357752535374	0.9876038516005015	0.6	300	minian
181	172	0.11633198700316802	0.9880667773518494	0.8610582947725827	0.9851449348520253	0.6	300	minian
182	274	0.6325874623366393	0.9881147977395841	0.9111773081403869	0.9785028804302326	0.6	300	minian
183	51	0.32559622693787915	0.9972008040138929	0.8539220602735299	0.9778566393197339	0.6	300	minian
184	183	0.3000062461684685	0.9873749900973811	0.8544778906722132	0.983972989423697	0.6	300	minian
186	187	0.26550984079681444	0.9816471167045445	0.9358030139344953	0.9858308203166776	0.6	300	minian
187	154	0.5495075818389186	0.9819372499371576	0.8926348592983343	0.9717792583644971	0.6	300	minian
188	88	0.3257088558941082	0.9846395620310073	0.8724243705950977	0.9737022778733992	0.6	300	minian
189	237	0.5215750707722255	0.9861837448523029	0.7915354118615785	0.9716635729266857	0.6	300	minian
190	72	0.6421615734686432	0.9851237922862242	0.8615904116190334	0.974362257408535	0.6	300	minian
192	60	4.697851259067775	0.7928021079536189	0.5987027486601703	0.7060441143980156	0.6	300	minian
193	43	0.518925076653966	0.9916918794482334	0.9323138048299197	0.9748287250087269	0.6	300	minian
194	106	1.4470323064809583	0.9541350847979676	0.671425078310571	0.7535632588245865	0.6	300	minian
195	120	0.12932852911001189	0.997229569818023	0.8218658471542533	0.9755259762664961	0.6	300	minian
196	42	0.5994572417817002	0.9860151355263476	0.8704618630820249	0.9728514570676908	0.6	300	minian
198	86	0.21247984030197736	0.9927308870848361	0.8869107557416571	0.9785924558582056	0.6	300	minian
199	100	0.22836103062947882	0.9946552317597778	0.8428964791719311	0.9789183093081869	0.6	300	minian
200	259	0.45795335222544115	0.9915476737670696	0.8775361457753181	0.9808121480404919	0.6	300	minian
201	269	0.6680450464851764	0.9871666486396224	0.949233797730126	0.9792648165017502	0.6	300	minian
202	222	0.33479131579087107	0.9954784373348069	0.86227887123991	0.988069793328514	0.6	300	minian
203	45	0.35491818651367174	0.9942551902672543	0.8599857642219136	0.9788668444495744	0.6	300	minian
204	228	0.19844161790471856	0.9939340945953361	0.8893216150263364	0.9677843849407392	0.6	300	minian
205	112	0.28565488313334597	0.9964944748707407	0.8757056251449056	0.9628341286309839	0.6	300	minian
206	248	0.40198537027159564	0.9900148996139381	0.8988200364683838	0.9748092063265466	0.6	300	minian
207	221	0.37575101971017444	0.9897771504322483	0.8693956569848306	0.9741854936369245	0.6	300	minian
209	215	0.14123095847486827	0.994337016768725	0.8766777969703172	0.9675660607365737	0.6	300	minian
210	158	0.5351596690460081	0.9862932688337409	0.8944294457833497	0.9889710237899961	0.6	300	minian
212	201	0.06551616610423183	0.9921920795186774	0.9145357706905975	0.9824400026712935	0.6	300	minian
213	84	0.31887782248269136	0.9856345499146638	0.8331052841096201	0.9799725948174103	0.6	300	minian
214	153	0.2890748118633554	0.993502804070278	0.855118029529828	0.9854938154941212	0.6	300	minian
215	256	0.26687746169313004	0.9895715992700826	0.8565799046237327	0.9653748651548862	0.6	300	minian
216	263	0.5502852875607	0.9879801264494655	0.8799899001282576	0.9675157914403149	0.6	300	minian
217	47	0.14149621771730758	0.9937363735565217	0.8713770508547102	0.9790454010427688	0.6	300	minian
218	113	0.4157786881287356	0.9955740175185352	0.8231459545410382	0.9787185966029349	0.6	300	minian
219	68	0.15070825953676567	0.9919104951323524	0.8852414417546605	0.9761302521997299	0.6	300	minian
220	137	0.5471997614388979	0.9868781734949048	0.8398381922909824	0.9764583944944492	0.6	300	minian
221	192	0.3064907949383344	0.9841616424682528	0.934182980940722	0.9659120484660084	0.6	300	minian
222	144	0.18700528532985233	0.9977883444605786	0.8625516044787527	0.9871704139694876	0.6	300	minian
223	230	0.3697794955077449	0.9912068241322645	0.8595798909568183	0.9743773374067396	0.6	300	minian
224	74	0.2877007461595924	0.9878438240443425	0.8474156752436139	0.9783611227672713	0.6	300	minian
225	94	0.13881613069038867	0.9940581965369595	0.8747132936176155	0.9852276829257233	0.6	300	minian
226	261	0.5377863269581811	0.9893507232883252	0.8333241352182652	0.9633370709444564	0.6	300	minian
227	117	3.825860379447245	0.875446406359022	0.7610885099410816	0.8888301555415339	0.6	300	minian
228	37	0.17665083359621148	0.9957814023975866	0.9505668847953566	0.9764781043496576	0.6	300	minian
229	28	0.04911366445902898	0.9975723547623343	0.8732830171096785	0.9781451890651575	0.6	300	minian
230	27	0.182519446487869	0.9970197780540048	0.8041393998088746	0.9639897365361232	0.6	300	minian
232	268	0.6838157779723633	0.9862278322653966	0.8459930436650519	0.9829705065865721	0.6	300	minian
233	199	0.11942920255032774	0.993585066057512	0.8165697488141981	0.9827461559110029	0.6	300	minian
234	223	0.7436111488484097	0.9786084302238244	0.8189137020810695	0.9715384155314644	0.6	300	minian
235	118	0.6163991220230538	0.9893453063388604	0.7910597187331232	0.9743518813224362	0.6	300	minian
236	67	0.2611919551923544	0.9937527702510639	0.8906137376667891	0.9848912461719203	0.6	300	minian
237	136	0.17062826592275854	0.9953459819721853	0.9054345229284142	0.9833599014001618	0.6	300	minian
238	206	0.15923165619087945	0.9951949059139589	0.8870011619788589	0.9776074835766548	0.6	300	minian
239	170	0.244862389674488	0.9968099718275301	0.8134696685594115	0.9803435538106231	0.6	300	minian
240	243	1.2133472905339402	0.9722372915975627	0.8310826529995375	0.9563328430694591	0.6	300	minian
241	40	0.6050515915242684	0.9858822572244215	0.8899869901878953	0.9751179415056648	0.6	300	minian
243	262	0.2530480191930014	0.9873411263700645	0.9099509443054916	0.9834512022005817	0.6	300	minian
244	152	0.41105200002544123	0.988298839928115	0.862035712032829	0.9830664243419855	0.6	300	minian
245	250	0.350089039573714	0.9927748140443361	0.8931320692531558	0.9776736060736054	0.6	300	minian
246	96	0.6157580753918451	0.9807046691133074	0.8451505245721364	0.9748068639550441	0.6	300	minian
247	101	0.08699882470925237	0.9933221016697088	0.9300577501555596	0.9813069289939261	0.6	300	minian
248	13	0.30487865732888403	0.992545066386429	0.8846710535392026	0.9704590937785806	0.6	300	minian
249	80	0.26118377384410374	0.9941990150930752	0.845366809423517	0.985387065163084	0.6	300	minian
250	226	0.45842899192400727	0.990064196891156	0.9445813221284526	0.9826334067519257	0.6	300	minian
251	150	0.20616717562267525	0.9965302990456725	0.9021001008633528	0.9833302657890448	0.6	300	minian
252	267	0.2098417692634182	0.9967512321109262	0.8542669788144913	0.9791212772932072	0.6	300	minian
253	111	0.20808027607615345	0.9978424480703937	0.8540296935252906	0.9821533379019438	0.6	300	minian
254	71	0.3741867205293145	0.9897886344924031	0.8956769978324459	0.9766282706991911	0.6	300	minian
255	122	0.18670846844558583	0.9945432763339396	0.9286178049972031	0.9828141079762103	0.6	300	minian
256	65	2.4596757192403182	0.863806338882906	0.7859460765846649	0.9659380434590156	0.6	300	minian
257	176	0.07736197333484969	0.9898556511299073	0.8739635411393207	0.974116740950645	0.6	300	minian
258	4	0.591019752611119	0.9820338734079215	0.869054126528823	0.9738383014831689	0.6	300	minian
259	255	0.23157158356832078	0.9966074174370136	0.895396221845899	0.9830735833309936	0.6	300	minian
260	134	0.3511977529549949	0.9966700439971089	0.8258528592603045	0.9836723460018728	0.6	300	minian
261	93	0.24626003479802172	0.9955246113837616	0.845866929514778	0.9848108365163587	0.6	300	minian
262	34	0.39141128330339786	0.9935495192191002	0.9016816633919502	0.9815579981186933	0.6	300	minian
263	143	2.0315773513633	0.9314418494566066	0.7240620349164475	0.7964427700149249	0.6	300	minian
265	246	0.429019925423594	0.9914333908292378	0.8978450945286325	0.9823259217398732	0.6	300	minian
266	62	0.39458016431083137	0.9874718425370581	0.9601798743510236	0.9843668131306686	0.6	300	minian
267	85	0.2257375959149907	0.9949253645056261	0.8636310511483698	0.9830291196044297	0.6	300	minian
268	116	0.6063119160101849	0.9878801183012262	0.9066775786518142	0.970979787177208	0.6	300	minian
269	141	0.5944196078835317	0.9868325211802166	0.8268370726327717	0.9720003117363331	0.6	300	minian
270	165	0.6322930248492635	0.979059122370056	0.9209591486377855	0.976486511611359	0.6	300	minian
271	50	0.23066766225977325	0.9801115136866095	0.8912798235736834	0.9662120359323098	0.6	300	minian
272	38	0.2925994466737343	0.9961439771232449	0.8883897405623588	0.9713265780618712	0.6	300	minian
273	216	0.7450888601993391	0.980298759101589	0.9113183904295392	0.9756247395304197	0.6	300	minian
274	119	1.1333544063405947	0.961383824943108	0.8347886608797368	0.9080386750148518	0.6	300	minian
275	44	0.4929358852721105	0.9899996771367321	0.9436306429357654	0.981773980090332	0.6	300	minian
276	32	0.18683881641296354	0.9937591080477258	0.8397618034412972	0.9809321186180547	0.6	300	minian
277	155	0.45175266809205816	0.9928629724988306	0.8732896589077542	0.9842269572158825	0.6	300	minian
278	203	0.14183916496564647	0.9944448351024454	0.9212264666731749	0.9744080454259255	0.6	300	minian
279	3	0.4026367540326803	0.9903339598556941	0.843793058879632	0.984691862550376	0.6	300	minian
280	104	0.21635214394183502	0.9940988994982672	0.9651856233642688	0.986098582071359	0.6	300	minian
281	162	0.3775135808324962	0.992041137308325	0.9379619639755864	0.9924198395396209	0.6	300	minian
282	25	0.08639262612594385	0.9959599706981273	0.8859529370200638	0.9780503880494914	0.6	300	minian
283	17	0.08756973779191045	0.9953995071363062	0.9109115154082763	0.9700295138408437	0.6	300	minian
284	166	0.5410016549524266	0.9818721066129708	0.8699783551895617	0.9775675657903213	0.6	300	minian
285	213	0.7664892322613872	0.982828204898156	0.9104450477386427	0.9728150931510867	0.6	300	minian
286	66	0.34272611744169357	0.9757866756006134	0.6536971395036226	0.6660684465419022	0.6	300	minian
287	207	0.2191817178344681	0.9942017355889738	0.8868445584987186	0.9734005082636318	0.6	300	minian
288	69	0.3179864602603444	0.9830069285577248	0.8469423882916282	0.97741422035955	0.6	300	minian
289	218	0.18341377830243874	0.9949201824675367	0.7634782524428553	0.9775031470228968	0.6	300	minian
290	180	0.26201267517592874	0.9956998008236431	0.9025893303655869	0.981978106326888	0.6	300	minian
291	56	0.3945727130803839	0.9934661737911591	0.850357462778967	0.9838792229389467	0.6	300	minian
292	240	0.5320813250367693	0.981867930318181	0.6440929523502605	0.6260951144590526	0.6	300	minian
293	114	0.19017295023612785	0.994546647087677	0.8493072868351076	0.9777471102432214	0.6	300	minian
295	209	0.05675681212458483	0.9978905049170945	0.8878034498652582	0.9566687893316853	0.6	300	minian
296	73	0.19281943762927403	0.9965139262902509	0.9179103943047577	0.9823162907409188	0.6	300	minian
297	245	0.39386455135168624	0.9934369337583231	0.8675023620860091	0.9785610350932108	0.6	300	minian
298	26	0.030385431569871748	0.9961025909253985	0.838209276370973	0.9743176586634679	0.6	300	minian
299	234	0.34115922989552416	0.994410485304213	0.8600456190893223	0.9758962158921622	0.6	300	minian
0	335	0.4314064084987511	0.9931611407158912	0.8286420267784739	0.9844892540282285	0.6	500	minian
1	26	0.4591127265217346	0.9766905384927729	0.9214202455401196	0.982420699667791	0.6	500	minian
2	352	0.23653064428954731	0.9968065078622645	0.8715402534249101	0.9864720642087971	0.6	500	minian
3	153	0.5362371204693306	0.9850958187655193	0.846957931717911	0.973438940385055	0.6	500	minian
4	368	0.5489818032762444	0.9913339533576122	0.8166528303574412	0.9836257672539555	0.6	500	minian
5	67	0.39680199583402315	0.9917544879941873	0.9138024328496885	0.9848655396713288	0.6	500	minian
6	194	0.5183203444233708	0.9814162641933271	0.8661137034336518	0.9706364833690369	0.6	500	minian
7	172	0.40666863121442176	0.994556978023127	0.8494306185655803	0.9837712151187054	0.6	500	minian
9	87	0.3724704750868002	0.9852236410414604	0.8864054621952567	0.9819396315486032	0.6	500	minian
11	18	0.4110695217587026	0.9791183425470397	0.8719407126722609	0.9700966850178283	0.6	500	minian
12	434	0.4383526213036061	0.9921158928550214	0.9037422588717741	0.9800504105803097	0.6	500	minian
13	156	0.39903631621607977	0.9931552667488156	0.8384786224394579	0.9731636210376172	0.6	500	minian
14	376	0.36838356373830666	0.9916212874059049	0.8615213161985266	0.9763823401176926	0.6	500	minian
15	302	0.32877555567762096	0.9889519932735955	0.8534597701193234	0.9836680987778507	0.6	500	minian
17	401	0.4291187478572553	0.9941369045415871	0.9141427961086581	0.9849755153779056	0.6	500	minian
18	342	0.2598003888652217	0.9967259561349384	0.826410147718541	0.985877436794996	0.6	500	minian
19	200	0.34286049112028405	0.9905121493745856	0.9235560148737724	0.9771667866175425	0.6	500	minian
20	346	0.301176845792886	0.9957776528140316	0.8544087765311347	0.989228534752477	0.6	500	minian
21	56	0.17531173924894947	0.9941188350704515	0.8657758689460662	0.9757523993386141	0.6	500	minian
22	222	0.0847141060582405	0.9944452667876202	0.8864524000542706	0.9843082142746004	0.6	500	minian
23	272	0.17132015453208393	0.9931280377930922	0.8739302818446514	0.9809903154030221	0.6	500	minian
24	337	0.36458105458085954	0.9901251537757342	0.8444443776869371	0.9755200100977823	0.6	500	minian
25	391	0.33673488108282723	0.990524503624187	0.855840514936169	0.9877658610220482	0.6	500	minian
26	360	0.1414694031498206	0.979496002476963	0.8337803984436026	0.9756260921840124	0.6	500	minian
27	129	0.30781482304878843	0.9943587328666531	0.8664139952988649	0.972264329128205	0.6	500	minian
28	319	0.3590199986726004	0.9910072557144395	0.8853555253984087	0.9798010972990601	0.6	500	minian
29	305	0.3302102275788796	0.9929301001662981	0.866729278298007	0.9771790718748461	0.6	500	minian
30	229	0.37840628053132014	0.9943052366506828	0.8623198989922188	0.9870728737960469	0.6	500	minian
31	83	0.15835943444098063	0.9937012323334383	0.8770763976012319	0.9713470475939198	0.6	500	minian
32	433	0.7280554808128509	0.9819213194373886	0.8346429860282211	0.9762210833571052	0.6	500	minian
33	60	0.8803638538660414	0.9747047377333211	0.7683162671464853	0.9001784293027913	0.6	500	minian
34	253	0.2854298337951768	0.9937134530115903	0.8452441409312222	0.9787801620336246	0.6	500	minian
35	108	0.5373741580789959	0.9834277795885701	0.8386392527831221	0.9770936843085615	0.6	500	minian
36	244	0.17078937675074352	0.9959360519422127	0.8926276272391449	0.9828469285331308	0.6	500	minian
38	231	0.1281861408024892	0.996623040063642	0.7685457449372727	0.9737179011659709	0.6	500	minian
39	6	0.06605445856042734	0.9976907140854709	0.9154712870453033	0.9916958467052872	0.6	500	minian
40	190	0.36357888855578574	0.995057923578385	0.8711069823195972	0.9826481759646892	0.6	500	minian
41	261	0.7029382742827028	0.9754891304010327	0.8917286926529443	0.9626854136239131	0.6	500	minian
42	185	0.48947525880346693	0.9904715940826685	0.9104518316736848	0.9755730913466678	0.6	500	minian
43	234	0.2950640928750205	0.9852377376416991	0.8932079844497401	0.9776924475338226	0.6	500	minian
44	121	0.05662673058821799	0.995939278136316	0.824479915881535	0.9797841613736763	0.6	500	minian
45	72	0.1818812510725494	0.9905430813642367	0.8850328612193344	0.9772580084550831	0.6	500	minian
47	354	0.3359213260036729	0.9934538384376432	0.8651160250622675	0.9780676850197972	0.6	500	minian
48	164	0.3037407204359976	0.9919375803713522	0.9289361107751203	0.9610149082000966	0.6	500	minian
49	55	0.24880984244687365	0.9901950194656938	0.8590623564319039	0.9800745518071343	0.6	500	minian
51	34	0.5241769081650196	0.988009674953219	0.919919429337641	0.9741128593041463	0.6	500	minian
52	266	0.21741404616852528	0.98367921080453	0.8354932053369457	0.9617214282883798	0.6	500	minian
53	36	1.3269261856187606	0.9633832021240029	0.7078981240315431	0.7573918595031021	0.6	500	minian
54	334	0.21569720620310223	0.9950923225274757	0.8803370837795012	0.9734605549266192	0.6	500	minian
55	134	0.45541587437145864	0.9903274945866246	0.8527600891724879	0.9725653222858434	0.6	500	minian
57	130	0.554872369685902	0.9858271384939244	0.9352117761364768	0.9849196038530235	0.6	500	minian
58	332	2.2217459606676115	0.9337050480916469	0.7129287579785751	0.7929731707236596	0.6	500	minian
59	49	0.3014419078738534	0.9798627413670508	0.8863250871235491	0.9678621690408507	0.6	500	minian
60	186	0.6966293664782554	0.9745080717736956	0.8613609858082348	0.9811935442545087	0.6	500	minian
61	114	0.4268460538158526	0.9952505101030797	0.8527022186403159	0.9797793140214435	0.6	500	minian
62	54	0.31710173597278857	0.9935516927065153	0.8226852530881972	0.9756534228604216	0.6	500	minian
63	260	0.5718024367690738	0.9827633183762149	0.9396504729317715	0.9672144824660283	0.6	500	minian
64	396	0.43478114001121493	0.994308435228462	0.9018324421953487	0.9773796300087032	0.6	500	minian
65	39	0.4047282565930154	0.9881000264239526	0.9415264676796131	0.9805110573719771	0.6	500	minian
66	379	0.14219119253748363	0.9948756994508473	0.8993507015012865	0.9858074329623033	0.6	500	minian
67	313	0.32656126336501384	0.9897125782534146	0.8728214320719443	0.9795008699122738	0.6	500	minian
68	410	0.33553969834123737	0.9945884551219538	0.9156972176337976	0.9874190055770747	0.6	500	minian
69	178	0.5804815734153974	0.9889999304096295	0.9220008936637489	0.9634383957029103	0.6	500	minian
70	375	0.4974325854166309	0.9830638729606301	0.8639025524459876	0.9685827450355979	0.6	500	minian
71	50	0.2021193957084653	0.9917261282907488	0.9488672908744946	0.9730143215517906	0.6	500	minian
72	281	0.6469881864984734	0.9880430538793716	0.8758955023469833	0.9647073832967041	0.6	500	minian
74	219	0.2396735080494477	0.9936505438930543	0.8785493837406975	0.9822728197766583	0.6	500	minian
75	385	1.0916844058208681	0.953182897067468	0.739704094687639	0.7019661571409445	0.6	500	minian
76	432	0.3712264209260325	0.9938449258820921	0.835608431518433	0.9873240692931387	0.6	500	minian
77	412	0.09974805336720285	0.9893853632265359	0.8449017949550656	0.9765573796539195	0.6	500	minian
78	90	0.5454253878069292	0.9894507724443956	0.9306400383122932	0.9820364249028771	0.6	500	minian
79	94	0.15921599969888736	0.9931568977857421	0.8619827370372491	0.9760611162416051	0.6	500	minian
80	311	0.32461665846905036	0.9826561693749581	0.8518935768754513	0.987387677995256	0.6	500	minian
81	182	0.2543004352181705	0.9958795833069768	0.8591144617999035	0.9726975148741739	0.6	500	minian
82	207	1.5171400178761096	0.9687001062543553	0.7350074828007079	0.860321723650439	0.6	500	minian
83	92	0.17912115773064818	0.9977618707462242	0.8867979309730314	0.9853657086106496	0.6	500	minian
84	237	0.468201285348915	0.9879817538581848	0.9087901486062877	0.9698566545184335	0.6	500	minian
86	106	0.3946303435383409	0.9926325501449214	0.8318510842181029	0.978543993330327	0.6	500	minian
87	299	1.7332089889676634	0.9306573984648793	0.5209002974484296	0.5736078437638865	0.6	500	minian
89	1	0.5200957121140978	0.9739165341792396	0.9420419237573345	0.9813091937401359	0.6	500	minian
90	89	1.1280414261948413	0.969129043959318	0.8216815326440787	0.9033889177034843	0.6	500	minian
91	37	0.49871275364286555	0.9931022161711729	0.8480632377847309	0.9702450643987073	0.6	500	minian
92	193	0.6649134464552091	0.9779107307491633	0.8305590137604403	0.962609884701248	0.6	500	minian
93	212	0.5466537252727593	0.9787497782185706	0.8354056827569213	0.9851389763880386	0.6	500	minian
94	251	0.18539655839537542	0.9969790891086917	0.8674039443425073	0.9875585176814965	0.6	500	minian
95	343	0.4550148319651231	0.9899690497504691	0.882039831526492	0.9778840031047364	0.6	500	minian
96	411	0.23736976919099015	0.9902756177511387	0.9116302873730737	0.9858947581436869	0.6	500	minian
97	84	0.3559663439219496	0.9932353041990405	0.8609062353393674	0.981405721535678	0.6	500	minian
98	27	0.041096134834497866	0.9664019808729213	0.7896834236929737	0.8290478938064775	0.6	500	minian
99	170	0.3126801265363628	0.9818927023958128	0.8830329888968127	0.9789139166800688	0.6	500	minian
100	223	0.10941547377320182	0.9910133249641058	0.8927380739331866	0.9822031812732389	0.6	500	minian
101	75	0.059749667731801404	0.99457530317619	0.8279238409781333	0.9743978613907416	0.6	500	minian
102	278	0.33547322112605343	0.9945869578210906	0.9111032623854144	0.9796635880627916	0.6	500	minian
106	424	0.6834753322818002	0.9795934902054142	0.8907831402268908	0.9852219663352404	0.6	500	minian
107	372	0.14774752423501025	0.9844861533955469	0.8958840516489393	0.9745113545172605	0.6	500	minian
109	118	0.24811369873541556	0.9844407034084103	0.9036245555675062	0.9739246364423382	0.6	500	minian
110	64	0.5420353023717374	0.9887595312437473	0.8501257061136777	0.9627486668636597	0.6	500	minian
112	189	0.6259960173744679	0.9887022485945187	0.9001218902930443	0.9781047719184268	0.6	500	minian
113	250	0.3081944068033324	0.9858022444751522	0.8275735798788909	0.9720030806491093	0.6	500	minian
114	218	0.2815297340680174	0.9945076629254748	0.7726052889339192	0.9782603812186852	0.6	500	minian
115	28	0.8535854957130621	0.9782481651558593	0.7408557928061039	0.850715350433698	0.6	500	minian
116	330	0.45805049533824926	0.9889016602340427	0.8418434056524239	0.9754490535319263	0.6	500	minian
117	381	0.2744316381832696	0.9875317445174426	0.8950545793462528	0.9869099928340671	0.6	500	minian
118	148	0.1665460549036513	0.9909555036677146	0.8978568179668195	0.9821146304720181	0.6	500	minian
119	397	2.13867153238024	0.9195593967533869	0.6385857900183235	0.6210922843491595	0.6	500	minian
120	247	0.23203822791992756	0.9921092376609538	0.834427485630476	0.9388337902115512	0.6	500	minian
121	46	0.5804995994349903	0.9880930588141693	0.8606086118902216	0.9705521714608197	0.6	500	minian
122	140	0.5339364315830114	0.9821998088627083	0.8863457863146442	0.9703531970407834	0.6	500	minian
123	395	0.21733131359715105	0.9951715972168013	0.8358790051767925	0.9846811696241291	0.6	500	minian
124	144	0.27836329341793775	0.9899629020286317	0.8073239546773284	0.9570027977042033	0.6	500	minian
125	196	1.0355790517026624	0.9693289162834298	0.7981245046627059	0.9020025868673216	0.6	500	minian
126	419	0.46509020517789496	0.9958995100076761	0.8757534418114633	0.9802854665100058	0.6	500	minian
127	301	0.31558069179353543	0.9850488995558657	0.919891174108182	0.9858439564404331	0.6	500	minian
128	202	0.3051040792471534	0.9946802025110572	0.8781437219798015	0.9739894006957336	0.6	500	minian
129	258	0.2968166570219209	0.9817351635560453	0.7852029032850818	0.9543922588670222	0.6	500	minian
130	235	0.20226209568170517	0.9889810037253964	0.7849118128044111	0.9326090100175398	0.6	500	minian
131	216	3.580611377058076	0.8182967768859362	0.8394651177725054	0.9486925133910469	0.6	500	minian
132	133	2.7036877890123017	0.9058874899368319	0.6987228813943582	0.7958921526311737	0.6	500	minian
134	74	0.38945410939909053	0.9916769107518402	0.7931107278619736	0.9839091398841758	0.6	500	minian
136	86	0.2927077649455079	0.9931042498067256	0.8805410625677482	0.982288666359456	0.6	500	minian
139	107	0.35673920573174817	0.9952340224222602	0.8249691200766499	0.9836073455239055	0.6	500	minian
140	16	0.2744246778071431	0.9926036354581298	0.8637437170732598	0.9761333948775536	0.6	500	minian
141	224	0.8268620766732707	0.9739973374168887	0.6166441486682601	0.7115234877738441	0.6	500	minian
142	183	0.753641648026767	0.9815996448137971	0.7859211255086582	0.9600346069925018	0.6	500	minian
143	233	2.474869386176767	0.8800148634328475	0.47594957622147066	0.6448099093454989	0.6	500	minian
144	309	1.4068136693137474	0.9199093993023283	0.7603529171860276	0.9788001586006405	0.6	500	minian
145	358	0.12843726077375875	0.9898552200518898	0.8470686423003364	0.9736117774481843	0.6	500	minian
146	383	0.4534731676799359	0.9941812635651374	0.9120028507416615	0.9815999950924226	0.6	500	minian
147	269	0.32524213164662324	0.9931281427096809	0.9144448663760131	0.971238183430054	0.6	500	minian
148	428	0.5901981322137095	0.9745922598565532	0.8808599229138365	0.976179243411908	0.6	500	minian
149	280	0.4056003047651374	0.989150819746946	0.9090084940528697	0.9885111558618912	0.6	500	minian
151	371	0.15783994909936147	0.9954369939085724	0.779819480162435	0.9762755001422468	0.6	500	minian
152	125	0.3784292840130038	0.9930806207878913	0.81449297767754	0.9624149012915556	0.6	500	minian
153	165	1.2361514084049408	0.9749872854845633	0.6290248620807545	0.7281087040342078	0.6	500	minian
155	388	0.06102214689963656	0.9973159988335819	0.8280922999173983	0.9797321559013648	0.6	500	minian
157	324	0.1760940336065358	0.9870662066864976	0.8693503225437395	0.9769987883104873	0.6	500	minian
158	265	0.17915324847555605	0.9973080155786652	0.9489734827554428	0.9661693845361837	0.6	500	minian
159	2	0.6500398861908628	0.9861518623740865	0.8659594911981016	0.9800464300221805	0.6	500	minian
160	187	0.6018818660256974	0.9861149323665488	0.8223803640859924	0.9665573409317637	0.6	500	minian
163	113	0.40422220125589814	0.9933335579755053	0.9275784587038506	0.984252153818048	0.6	500	minian
164	158	0.21794512284291995	0.9953244909659584	0.8264226812039315	0.9795576026816121	0.6	500	minian
165	24	0.36478375870941043	0.9850589804708022	0.8627154135648114	0.9698110382091933	0.6	500	minian
166	304	0.37981920862222074	0.9881131822692246	0.8742278915724481	0.9724904718379411	0.6	500	minian
167	232	0.12968317350657296	0.9942655930641853	0.8698101006663838	0.9794248220852422	0.6	500	minian
168	417	0.6036352331024771	0.9901673966936756	0.8787307870022932	0.9809426308729172	0.6	500	minian
169	179	0.6447059643875077	0.9827712813336489	0.7869235519351706	0.9656603914220361	0.6	500	minian
170	347	0.17202951421764986	0.9965122765597932	0.914926569172012	0.9867775441286086	0.6	500	minian
171	288	1.7127522780309223	0.9436136219638424	0.7299813152406354	0.7909182555461518	0.6	500	minian
172	399	0.3576628620342418	0.9956927328889263	0.8354033350118244	0.9794512227708101	0.6	500	minian
174	314	0.17420158746213965	0.9958666109675672	0.7743646663705378	0.9783549652979859	0.6	500	minian
175	370	0.3156133174235127	0.9966642332886116	0.7636023699663382	0.9847630230648693	0.6	500	minian
176	12	1.9290816316998842	0.8959202472248996	0.5307975185470626	0.6889121919370723	0.6	500	minian
177	0	0.08439159799834807	0.9892441932105094	0.7659927434599235	0.976996767439185	0.6	500	minian
178	357	0.3095172558086245	0.9945471322348646	0.8423831665576318	0.9830610305280872	0.6	500	minian
180	38	0.39842519786643454	0.9878298190282554	0.8779865425660754	0.9713581261109526	0.6	500	minian
181	124	0.37882435745498766	0.994411381279679	0.7541332978524178	0.9792391808726456	0.6	500	minian
182	415	0.6457266915035741	0.987357980781779	0.8901599016369105	0.9763486251939442	0.6	500	minian
183	421	0.21439519540805213	0.9957571926256514	0.8478106777216977	0.9755746588838071	0.6	500	minian
184	300	0.39391354497839914	0.9899530158420934	0.8418017002048409	0.9253513074355809	0.6	500	minian
186	31	0.1326082210535475	0.9929639909528111	0.8876462955274788	0.9762838919796987	0.6	500	minian
187	77	0.43361773676311943	0.9842323304914093	0.8471894191716378	0.978023258079091	0.6	500	minian
188	366	0.37920463836822554	0.9948561838250217	0.8183782454568711	0.9835159325260521	0.6	500	minian
189	195	0.4207389028513032	0.9914652015427299	0.846286624397456	0.9760440345211224	0.6	500	minian
190	101	0.4796774350839893	0.9678528474860952	0.830984659088101	0.9689894595144604	0.6	500	minian
191	312	0.7004778305870826	0.9855172611889	0.8677984513974824	0.9607941871481059	0.6	500	minian
194	273	0.2595187945675117	0.9945813601914197	0.862941683659582	0.9821365448331653	0.6	500	minian
196	326	1.5146008795794808	0.9481582323516958	0.6663728232086787	0.7744033095773589	0.6	500	minian
198	230	0.08584777262730596	0.9931831067254935	0.8159668512681014	0.9811430153966921	0.6	500	minian
199	78	0.3951569211133529	0.9922271815559365	0.8266893080548218	0.9718997865250628	0.6	500	minian
200	181	1.72824867709427	0.9427008433194848	0.6671193126407874	0.8035068233171527	0.6	500	minian
201	30	0.5044982750571736	0.9889797420491931	0.7917788840952081	0.9621217684387858	0.6	500	minian
202	377	0.06781631620462084	0.9932455925081667	0.8706461356015999	0.9801394342114158	0.6	500	minian
203	33	0.42316534381106524	0.9876537286044798	0.8564057639084113	0.9798340681673711	0.6	500	minian
205	76	0.6221371466494406	0.9875499039600694	0.8239541815583099	0.9737157574146291	0.6	500	minian
206	333	0.20206221236641103	0.9965290826551739	0.907684987475661	0.9807758998153426	0.6	500	minian
207	394	0.46797285959669127	0.992314078927591	0.8233581909022526	0.981412763602225	0.6	500	minian
208	423	0.5703330031767427	0.9889506079201094	0.8560260970486581	0.9839423980186583	0.6	500	minian
209	3	0.521604221825914	0.9790393902079583	0.8681116298274683	0.9783446090364208	0.6	500	minian
210	274	0.45349532814038174	0.9895189330645922	0.8769161505427846	0.9754706752931437	0.6	500	minian
211	47	0.687126881808517	0.9838659327437879	0.9173563196595265	0.9774286418391565	0.6	500	minian
212	143	1.7893462763332082	0.9511714155415024	0.7039360413456314	0.8132404818758588	0.6	500	minian
213	120	0.47127986283381074	0.9888219690779192	0.8026125585576279	0.9741931531395932	0.6	500	minian
214	71	1.3346452286934791	0.9686938344348871	0.5754192101993136	0.6091714557031739	0.6	500	minian
215	171	1.1006785431797221	0.9678481390777258	0.8343849859959269	0.9015090605199823	0.6	500	minian
216	363	0.15638148267988333	0.987043007619752	0.9601030387207417	0.9817102679114036	0.6	500	minian
217	416	0.5167004337468689	0.9854713553357656	0.8886259940139964	0.978598413047401	0.6	500	minian
218	162	0.20726345925577097	0.9932411117392189	0.9343319261262931	0.9784919747825706	0.6	500	minian
219	123	0.24018307689210164	0.9934993960445531	0.8647421237491916	0.976235023684383	0.6	500	minian
220	151	0.2488186811016608	0.9958567570135356	0.8277177724189371	0.9867257203973622	0.6	500	minian
222	236	0.22193033195512504	0.9941062619864206	0.7911917767393432	0.9849195030985762	0.6	500	minian
223	279	1.8748994606668212	0.9279187196708056	0.7225978483030188	0.7515587599400673	0.6	500	minian
224	117	0.37432602014008026	0.9906840388084094	0.9097294772926469	0.9829743335869002	0.6	500	minian
225	362	0.1046828273481423	0.9917016190447361	0.8739571650347586	0.9806235325459826	0.6	500	minian
226	138	0.39107868652305156	0.9924333730443428	0.8285382530574775	0.9772513011028529	0.6	500	minian
227	110	0.254303976498271	0.9961908701238124	0.8610896152862453	0.9796153440770824	0.6	500	minian
228	405	0.26159943873600433	0.9935319158408079	0.8110804388826439	0.9850888530114934	0.6	500	minian
229	21	0.5274195834903387	0.9834174384948641	0.892458373712836	0.9866719513203001	0.6	500	minian
230	139	0.23883840967396364	0.9932925672267711	0.9007561553862313	0.9762175998234676	0.6	500	minian
231	7	0.17379094369855266	0.9820170506778569	0.8854024097974827	0.9868363431728939	0.6	500	minian
232	127	0.36917912920711277	0.9886323582030189	0.8455328380269698	0.9787454396689695	0.6	500	minian
233	42	0.20080058655505534	0.985208886234316	0.7359402907155569	0.804820454036329	0.6	500	minian
234	275	0.3952207554473297	0.9920173856596431	0.8670452591972226	0.990276587253543	0.6	500	minian
235	294	0.35575291426870587	0.993262708716025	0.9081713711718263	0.9841141922158463	0.6	500	minian
237	392	0.44040119845014825	0.9931644966254451	0.8108364898969033	0.9563422949782507	0.6	500	minian
238	408	0.038896757000140066	0.9949360344603267	0.8307773802412666	0.982002435049817	0.6	500	minian
239	45	0.8873308078146148	0.9806492897877919	0.7690610090252589	0.8782302031815638	0.6	500	minian
241	211	0.5770721052246418	0.9883828705964998	0.8270376891803807	0.9797126001770212	0.6	500	minian
242	40	0.5250270292833014	0.9916317959424863	0.8551213217979948	0.9869914356937985	0.6	500	minian
243	369	0.5071098324978205	0.9914622161438124	0.8943181637546944	0.9872496209461024	0.6	500	minian
244	122	0.2721411624232589	0.9937964820940891	0.9386862147941363	0.9840576191442699	0.6	500	minian
245	43	2.0340324893368833	0.9072736565478232	0.5513135018326896	0.5660192763827571	0.6	500	minian
247	344	0.251153535304076	0.996399109502296	0.8805518397332426	0.9821056494483524	0.6	500	minian
248	22	0.11476903319753333	0.9974850489133763	0.8922615392410842	0.9862888743520477	0.6	500	minian
249	5	2.14077588698207	0.9278759945210575	0.6355071783326991	0.746089467688052	0.6	500	minian
250	52	0.30497852105792667	0.996718515987201	0.7748601004175198	0.97919998693419	0.6	500	minian
251	65	0.36807434263970484	0.9947635124795984	0.8724006886087223	0.978412727540174	0.6	500	minian
252	298	0.5702614750708939	0.9882071791946919	0.8433223940297667	0.9801235842292774	0.6	500	minian
253	308	0.6152670352105462	0.9839339518135394	0.833177036088588	0.9848763107770155	0.6	500	minian
254	292	0.22718897979234393	0.9929519763187749	0.8568458615999428	0.9736144964537664	0.6	500	minian
255	338	0.47252368109159737	0.99275959504465	0.8422304767881446	0.9732985214373425	0.6	500	minian
256	263	0.41228150497487126	0.9954096974341773	0.769655845983181	0.9842111525638589	0.6	500	minian
257	426	4.611172905972462	0.7788805586522844	0.5347501734501432	0.6240572012099824	0.6	500	minian
258	149	0.30500160474914734	0.9695730965403113	0.9118806119905896	0.9726295483479767	0.6	500	minian
259	103	0.7939617832566428	0.9804573013839547	0.8129851970264256	0.96069082034056	0.6	500	minian
260	97	0.4898210521524132	0.992554083941355	0.807059180510835	0.9808308199698191	0.6	500	minian
261	282	0.42246222596281807	0.9904418159306592	0.8339989760352066	0.9759278889240464	0.6	500	minian
262	380	0.5705053801829951	0.9869602844826887	0.8861138318035716	0.97492892097246	0.6	500	minian
263	213	0.2486289962958839	0.9925290544025768	0.8835661658130635	0.9766175003107405	0.6	500	minian
264	152	0.16556712093338674	0.9927876174938381	0.8693603375478871	0.9789336149061567	0.6	500	minian
265	318	0.456235849090766	0.9847626963777789	0.829103426040364	0.9753241068358823	0.6	500	minian
266	88	0.34453798447419526	0.9933925393887242	0.8472969502388259	0.9780169495505345	0.6	500	minian
267	154	0.050372440433435535	0.992328256872731	0.8968468857183762	0.9807240535781452	0.6	500	minian
268	204	0.4995297188600631	0.9872996884738834	0.8679335877391491	0.984953519133414	0.6	500	minian
269	413	0.32488027239448536	0.993677120609875	0.8925917331740899	0.9809104373605011	0.6	500	minian
271	429	0.4210846756370135	0.987277918721523	0.7663364015037595	0.9885545265135651	0.6	500	minian
272	351	0.3625309254714855	0.9708706842691268	0.8616880525797646	0.9686278759719836	0.6	500	minian
273	136	0.19073602673256196	0.9913850912679989	0.9203750668652259	0.973684661496215	0.6	500	minian
274	209	0.09476251759331093	0.9980835947833453	0.9073005924103148	0.9879348199767032	0.6	500	minian
275	238	0.31290167726585794	0.992779334556293	0.8861633153127891	0.9784607694083485	0.6	500	minian
276	142	1.4426626199870138	0.9613387763436496	0.771084523575345	0.8135516328870188	0.6	500	minian
277	271	0.6730273581208182	0.976474517475222	0.8417562102124664	0.9738912378388218	0.6	500	minian
278	400	0.41165631824854015	0.9907418045088698	0.8281187181791861	0.9885795103842602	0.6	500	minian
279	339	1.4195169206631575	0.9620750730372962	0.6975888428413735	0.7301611902968018	0.6	500	minian
280	104	0.5514582832834813	0.988098414177256	0.9092533752166726	0.9737317047011536	0.6	500	minian
281	228	0.3290583063750184	0.9924420461049083	0.8553258857218677	0.9647716605841331	0.6	500	minian
283	306	1.9279976168331616	0.9286076010105544	0.6783013536672362	0.7193729968608283	0.6	500	minian
284	407	0.19966686955773918	0.9931494991796589	0.7757906502034405	0.9851594545417616	0.6	500	minian
285	23	0.23356216015002806	0.9952590285117501	0.8144018592001058	0.9693668984693771	0.6	500	minian
286	173	0.2650764845107715	0.9923061113248274	0.875712574816889	0.9706018768767158	0.6	500	minian
287	155	0.205963322374186	0.993818380691099	0.8470281389403852	0.97663260576332	0.6	500	minian
288	191	0.6427470280033132	0.9874170848291648	0.920708924054807	0.9737764147341795	0.6	500	minian
289	214	0.44404717800982413	0.9824764872979974	0.857405942780596	0.9778258953751534	0.6	500	minian
291	57	0.19541938256532387	0.9959373247628448	0.8769767005871656	0.9745894674919068	0.6	500	minian
293	430	0.3639048050678983	0.9846625692410264	0.8548005238092592	0.9817048600888283	0.6	500	minian
294	240	0.24707942633137905	0.9925717189050198	0.8953285883292498	0.9775496862303712	0.6	500	minian
295	126	1.676566012542721	0.9477656045254189	0.6690393588126333	0.7603989739023973	0.6	500	minian
296	323	0.4214063410691859	0.9922569349341565	0.8427781891824093	0.9816121410124701	0.6	500	minian
297	350	0.2980818054783257	0.9933822563542188	0.7688507744889305	0.9674570103738515	0.6	500	minian
298	327	0.3413051160517662	0.9908543797484791	0.9365671906902433	0.9835419266568951	0.6	500	minian
299	276	0.07037494923973632	0.9920698191923267	0.8157206761869195	0.9595401390336742	0.6	500	minian
300	225	0.31059727960546674	0.9895538626012439	0.7740398388906888	0.9701450964111308	0.6	500	minian
301	197	0.3926289796920454	0.9953192948442984	0.8852078555178696	0.9886657832092983	0.6	500	minian
302	248	0.4746274569118483	0.9704093192800584	0.8808061934843909	0.9708258827985592	0.6	500	minian
303	277	0.4386812134795125	0.9922244994426214	0.8633379423500598	0.9814764820462468	0.6	500	minian
305	364	0.6442518051069143	0.9786296448649039	0.8204416335499354	0.9722209820946133	0.6	500	minian
306	348	0.2874770950718259	0.9961604920867099	0.8722162491367581	0.9836149209277335	0.6	500	minian
307	20	0.6834567258038968	0.9715307611456404	0.8903803883884838	0.9788121195877947	0.6	500	minian
308	141	0.502043662427486	0.9888730719174578	0.8661071274405281	0.9779260316108183	0.6	500	minian
310	420	0.4534410593640388	0.9914079841481623	0.8898224166410872	0.9833483768786808	0.6	500	minian
312	422	0.5843770920682168	0.9910085095833217	0.8570006520382237	0.9724449094465599	0.6	500	minian
313	268	2.3866549549592198	0.9133994423345602	0.671771543575186	0.731580128745451	0.6	500	minian
314	254	0.21702728690562026	0.9929428089893407	0.8635697810526735	0.9743114525925443	0.6	500	minian
315	256	0.2465110156340884	0.9786606702446969	0.9090804962321479	0.9497040401741124	0.6	500	minian
316	373	1.1028200891682176	0.9397860433145154	0.8532721484697235	0.9807100251159231	0.6	500	minian
317	169	0.6280935164370242	0.9847293963628297	0.9206234103985173	0.9835061500794651	0.6	500	minian
318	98	0.23603828088210918	0.9856190338038551	0.8477995496869013	0.9775558931151378	0.6	500	minian
319	418	2.059954751147003	0.9384120807303783	0.7930196363467542	0.831991413298691	0.6	500	minian
321	262	0.437340440151436	0.9838380587842551	0.8297746585095335	0.9527175761001749	0.6	500	minian
322	167	0.23700683351294513	0.9944338056306161	0.9026513431992067	0.9683967445332058	0.6	500	minian
323	175	0.18487967054896867	0.9971528648464569	0.9574369750675135	0.984786555952951	0.6	500	minian
325	378	0.2220963734809128	0.9967132197480362	0.8711978315890873	0.9825218543869533	0.6	500	minian
326	285	0.33214400036442315	0.992663705769946	0.8516266112761809	0.9723188761309379	0.6	500	minian
327	53	0.9885435509029152	0.9762584565234306	0.6108006348954971	0.5943586845844098	0.6	500	minian
328	255	0.5043763938325246	0.9888193124463109	0.8961947482012477	0.9735629778910903	0.6	500	minian
329	315	0.9883553404619411	0.9794298251474226	0.8847426317215392	0.9743674443214606	0.6	500	minian
330	188	2.214787382604703	0.8862900988121805	0.6782084022931022	0.7106099936782845	0.6	500	minian
331	4	0.45465835798990994	0.9754759354764334	0.8713196837299845	0.9779442790696296	0.6	500	minian
333	259	0.7188876589410551	0.9707302167975066	0.7958812411761104	0.9753672499633955	0.6	500	minian
334	174	0.28078356889666506	0.9805459989279867	0.7144421621535084	0.7437799782646604	0.6	500	minian
335	168	1.839935584260765	0.9432414598676447	0.6978916073375153	0.7552910791413424	0.6	500	minian
336	161	0.3362139318403759	0.9958208230146532	0.9093269769014682	0.9818071033926926	0.6	500	minian
337	252	0.27756424870736945	0.993195707145327	0.8639317251157503	0.9708126839484853	0.6	500	minian
339	361	0.39551965406274436	0.9932320230663298	0.8776055697362085	0.9747057969747579	0.6	500	minian
340	291	0.5928220320527058	0.9856328339250878	0.9323392492233677	0.9798860069179262	0.6	500	minian
341	128	0.40756044759080007	0.9940353924031422	0.8240254324079483	0.9782144440328455	0.6	500	minian
342	249	0.23736797813586558	0.9966820616957219	0.7251366415762381	0.972056999887288	0.6	500	minian
343	205	0.4868267115956734	0.9859116926592966	0.8122457988433693	0.9738424012485467	0.6	500	minian
344	95	0.5092213509341948	0.9913564041952397	0.9515378498081177	0.9818021979617342	0.6	500	minian
346	393	0.34832987382905134	0.9904312658791908	0.8066401470209544	0.977468773856534	0.6	500	minian
347	290	1.3404202160971053	0.9678428327529991	0.6593406994303024	0.7312597764039223	0.6	500	minian
348	180	0.02114818640363338	0.9939025099350949	0.8127469403854691	0.8867522852307135	0.6	500	minian
350	414	0.7763019295818085	0.9769427130898932	0.82578883375205	0.8982293898630788	0.6	500	minian
351	226	0.5126859279250143	0.97603606737265	0.891077081213977	0.9752742229569624	0.6	500	minian
352	221	2.5013227601529526	0.900692899809744	0.7026825160296484	0.7742529041776174	0.6	500	minian
353	81	0.3727251520720187	0.9868418319575267	0.8957738532357908	0.9837169770687443	0.6	500	minian
354	287	0.3724519434759202	0.9944048083309697	0.8894755045387679	0.9844311600250001	0.6	500	minian
355	147	0.3680851703626193	0.9876287038657534	0.8097011823287934	0.973363196833985	0.6	500	minian
356	284	0.7162479375834468	0.9837925422135829	0.866722173248265	0.9754438677160163	0.6	500	minian
357	109	0.5040486435792363	0.9792203834265438	0.8103562014615899	0.9749448888742814	0.6	500	minian
358	242	0.42426949167867517	0.9915910962933614	0.9312424264203457	0.9765176952236072	0.6	500	minian
359	68	1.8336801970620094	0.9356541052943643	0.7352063096930832	0.7839576544722825	0.6	500	minian
360	270	0.14866087373891446	0.9926293666005981	0.8752801052558687	0.9680212170869756	0.6	500	minian
361	184	0.6044346088088455	0.9862229048621148	0.8361755385586617	0.978834913890603	0.6	500	minian
362	150	0.04233745776343609	0.9926927983155279	0.8380979780389193	0.9766747214667716	0.6	500	minian
363	82	0.3623226752657516	0.990792261414809	0.8805489264543173	0.9753003622312567	0.6	500	minian
364	246	0.7185133211521495	0.9562347698306877	0.8390315480301559	0.9752581417857307	0.6	500	minian
365	201	0.30040856427188445	0.9975524354185494	0.8217620792894234	0.9655791067556264	0.6	500	minian
366	390	0.03911486814276141	0.9956267527813925	0.8134229434971172	0.9845864806383477	0.6	500	minian
367	295	0.42531796206709765	0.9948547643081892	0.9138213064494592	0.976898047280033	0.6	500	minian
368	69	0.1212082648866873	0.9877632728137334	0.8761614977413856	0.9691708056375047	0.6	500	minian
369	135	0.14670699851544908	0.9959751202557038	0.7946521958833814	0.983893631724763	0.6	500	minian
370	25	0.20604796749343474	0.9939475763859885	0.8687556486799565	0.966204736156897	0.6	500	minian
372	283	0.32965166695567455	0.9932094637629076	0.9322753383153769	0.989094653152912	0.6	500	minian
373	9	0.15134162778398477	0.9895073630427089	0.8646610916032069	0.9683208688659148	0.6	500	minian
374	11	0.25182874407753747	0.9953252325936152	0.874812790767473	0.9855478420833685	0.6	500	minian
375	8	0.32076719689988986	0.9883617852842108	0.8584066996968558	0.9816686515468668	0.6	500	minian
376	220	0.2752336032398459	0.992947475219153	0.7862425926806805	0.9643962859711092	0.6	500	minian
377	409	0.7385152047721839	0.9856573766113733	0.9412135789671526	0.9826882031095172	0.6	500	minian
378	329	0.4479310507059888	0.9933029602170188	0.8721863089029723	0.9871119067146207	0.6	500	minian
379	387	0.2239325091496199	0.9877954697128593	0.8998774151155443	0.9823547191202724	0.6	500	minian
380	116	0.43985928263706986	0.9928332237192671	0.8711129331617639	0.9839079288123067	0.6	500	minian
381	243	0.3202101706224235	0.987082705052931	0.8258732678074739	0.9727158433563187	0.6	500	minian
383	328	0.5273832252085326	0.9869780042397135	0.8921523190655574	0.9857166002768918	0.6	500	minian
384	353	0.22206419228879917	0.9951671349543345	0.8277370962384668	0.984392356105564	0.6	500	minian
385	340	0.3243007607642428	0.9894735224673403	0.9135945139667376	0.9684342299359879	0.6	500	minian
386	59	0.4767610558712559	0.9877107404190972	0.8944016358201013	0.981866349145725	0.6	500	minian
387	303	0.4154226720137495	0.9931355086431713	0.9066969020389057	0.9831634839457558	0.6	500	minian
388	13	0.13036416194969255	0.9951147496600004	0.8870743140001053	0.9833357214968805	0.6	500	minian
389	310	0.39568454680107973	0.9929162615215386	0.8620642865616438	0.9792706915439475	0.6	500	minian
390	85	0.3723283554029897	0.9944441203331693	0.8009238292414359	0.9769202299789244	0.6	500	minian
391	93	0.21986780862236727	0.9925255115043384	0.8602333740369064	0.9734177196931998	0.6	500	minian
392	286	0.381938514703894	0.992788406961205	0.8800442786026492	0.9746306023457114	0.6	500	minian
393	257	0.1783258065331673	0.9661931843946052	0.7922123487962803	0.9555842384696235	0.6	500	minian
394	210	0.5167614634436346	0.9873501449007552	0.8899237802313031	0.9724520339337652	0.6	500	minian
395	48	0.2350224453710986	0.9950024990958951	0.85271785480391	0.9702318874157536	0.6	500	minian
396	336	0.258637456962841	0.990204259052713	0.8350009116339147	0.9770534063695728	0.6	500	minian
397	406	0.129957098704516	0.9955775828430751	0.8670529458589176	0.98291472661887	0.6	500	minian
398	384	0.33545014552594515	0.9970763301253351	0.8347515559862182	0.9815377730009706	0.6	500	minian
399	331	2.205725412265331	0.8704238642270544	0.5547894781105358	0.9124482489537667	0.6	500	minian
400	73	0.5318311555603114	0.9891161701140886	0.8652938506548106	0.9786796861792773	0.6	500	minian
401	159	0.39274425465745744	0.9915130785211176	0.8894339453375384	0.9699959511221534	0.6	500	minian
402	427	0.4452745090606766	0.9901155724432892	0.8877399570567055	0.9834493770010405	0.6	500	minian
403	198	4.2370372323655054	0.8312992110843357	0.612076006040332	0.7626110140312814	0.6	500	minian
404	132	0.239623004521269	0.9951162571743313	0.7697687977439679	0.9713436533034107	0.6	500	minian
405	267	0.17464738600098173	0.9925224997268746	0.769451726334624	0.9743691527949988	0.6	500	minian
406	431	0.5228666138143531	0.9940383659413305	0.9224331553480608	0.9790992333803503	0.6	500	minian
407	131	0.5014286011715076	0.9832832564841089	0.8967863265060586	0.9808517956695914	0.6	500	minian
408	356	0.05914438587859009	0.9930227350055421	0.8262552017751377	0.9856880940255721	0.6	500	minian
409	15	0.09849072595397376	0.9941374507781485	0.7567922335769147	0.9766881624940676	0.6	500	minian
410	112	0.3307587742802961	0.9837474351114964	0.9073741690464183	0.9703853196613469	0.6	500	minian
411	91	0.2801077435179805	0.9930561364226843	0.8735402331842438	0.9796827557654983	0.6	500	minian
412	215	0.33821648937930476	0.9939787695354306	0.9106788197735848	0.9838021462621463	0.6	500	minian
414	239	0.44346598895231254	0.9918066978654131	0.8980803554065715	0.9784148086804663	0.6	500	minian
415	99	0.4598820556569021	0.9927119964297973	0.8433255831174892	0.9756589000456056	0.6	500	minian
416	111	0.5358298212836077	0.99249756314702	0.855560295751852	0.980770444933479	0.6	500	minian
417	245	0.1617652578733974	0.9958359102252797	0.8558105609840926	0.9774570639849699	0.6	500	minian
418	157	0.4199201669832391	0.9936652183377457	0.8263739013032119	0.9783533569797004	0.6	500	minian
419	79	0.20653652821841634	0.9749337368368187	0.8431250126700389	0.9652189480517885	0.6	500	minian
421	374	0.34489670691777397	0.9921229599942637	0.8816936238019965	0.9529352862277669	0.6	500	minian
422	145	0.10478840931412886	0.9950595198260762	0.83977420259631	0.9573665797396311	0.6	500	minian
423	402	0.5580078904761462	0.986985742379049	0.8780120305826219	0.9796747056499227	0.6	500	minian
424	10	0.5099396690676562	0.981863227146495	0.8425219804655912	0.9798617970769028	0.6	500	minian
425	29	0.6051315908411877	0.9826355071075175	0.8558070452729274	0.9732227615112441	0.6	500	minian
426	44	0.5596424616111686	0.9870612275839078	0.9228480615633659	0.9771836084255933	0.6	500	minian
428	359	0.23172959271157076	0.9849953727441237	0.7887409433318394	0.9690199173688115	0.6	500	minian
429	61	0.28626103999672153	0.9922975624260955	0.8145394699846089	0.988167800453493	0.6	500	minian
430	425	0.5761631595136955	0.9942150459651065	0.8561455426995438	0.9629543642367803	0.6	500	minian
431	320	1.6610318312926942	0.924732124020585	0.7056774390533356	0.77057362524364	0.6	500	minian
432	160	0.21797957885561234	0.9969783065374873	0.8574264865659859	0.9843055586100117	0.6	500	minian
433	102	0.5860326900470986	0.9859784651535565	0.7642953596598916	0.9558625483709241	0.6	500	minian
434	146	0.9760578094381296	0.9825622917739623	0.5132428128644192	0.5132058598145871	0.6	500	minian
435	203	0.3070574948029803	0.9918060153052358	0.9219666735941109	0.9820273913418563	0.6	500	minian
436	217	1.089450628146073	0.9581466083750612	0.8010170851869898	0.9329430857231255	0.6	500	minian
437	386	0.5022425016758488	0.9900556423305497	0.8401935114712158	0.9824410054915148	0.6	500	minian
440	398	1.7609107107289932	0.9363236589356428	0.7018015448962298	0.7468463329450539	0.6	500	minian
441	17	2.1523487693313266	0.924848552261698	0.6826092604264176	0.7363842201142436	0.6	500	minian
442	208	0.4156493986209019	0.9944473503223565	0.8203651996461737	0.9766652323446435	0.6	500	minian
443	80	1.3867355192961561	0.9583507411563285	0.6433350933512451	0.777918912450984	0.6	500	minian
444	382	0.5144803495223769	0.9897060514727156	0.8787957491110232	0.976802431776503	0.6	500	minian
445	119	0.20875576236629492	0.9891668671707913	0.9237463886440216	0.977844390804479	0.6	500	minian
446	404	0.26318507716302086	0.9927385482837794	0.8233790489069464	0.9699411049868653	0.6	500	minian
447	96	0.14093060141776773	0.9880584437768073	0.9016685797344511	0.9773011895100323	0.6	500	minian
448	325	0.3475534039678675	0.9897007074042454	0.9387812397321809	0.9832464681097418	0.6	500	minian
449	66	0.22797651765794438	0.9944732254444799	0.7933113587599143	0.9814036121217443	0.6	500	minian
450	32	0.6014952758364588	0.9894142440040743	0.8778453167995861	0.9718314447378595	0.6	500	minian
451	389	0.03852376755112653	0.9987694470979412	0.7304604700160806	0.9891908027356751	0.6	500	minian
452	105	0.49900952397159437	0.9805620368388633	0.928594237873275	0.9722569887946783	0.6	500	minian
453	297	0.615240843088806	0.9815018178604819	0.8779023138293593	0.9550719661042247	0.6	500	minian
454	115	0.438884820508225	0.9943913630040692	0.8402930871846851	0.9868882340933486	0.6	500	minian
455	70	0.21005481078500665	0.9980385125166082	0.8269836332816245	0.9794921180093392	0.6	500	minian
456	192	0.34186287427971596	0.9937208050694897	0.8007541892568032	0.9788487681836512	0.6	500	minian
459	51	0.22306002841007702	0.9926713933891692	0.8676531921801985	0.9670627834695728	0.6	500	minian
460	355	1.4804465637402862	0.9566655182867495	0.7311771971486393	0.7890533317178625	0.6	500	minian
461	166	0.773273741775542	0.9596713324854047	0.8091035781215641	0.9595903711350215	0.6	500	minian
462	349	0.31679762056837674	0.9958101328407926	0.845778550316316	0.9851336321920272	0.6	500	minian
463	137	0.19639897415525887	0.9861960853475915	0.8724374396659812	0.9774220964040345	0.6	500	minian
464	100	0.5652609765855402	0.9872409126887189	0.8797526832714181	0.9734336222642974	0.6	500	minian
465	62	0.5267373593851785	0.9877257916272136	0.8513774688820148	0.966229581116985	0.6	500	minian
466	227	0.2781115318510504	0.9887872471329778	0.810091101506517	0.9755325756185984	0.6	500	minian
467	307	0.2530229505587254	0.9890822810182786	0.8079114225758673	0.8799017100028265	0.6	500	minian
468	19	0.3717208380065892	0.9887522799827845	0.8730260517378391	0.9667035243113186	0.6	500	minian
469	296	0.11417383801963599	0.9966966549271874	0.8487936870271683	0.9787827261529403	0.6	500	minian
471	317	0.5159485271307603	0.9892480341294484	0.9066250562178169	0.9770346227457486	0.6	500	minian
472	35	0.1553309227431707	0.9960420676898362	0.8755022684274152	0.9746237548156345	0.6	500	minian
473	365	0.2516426292535826	0.9925492679034159	0.7838726238132013	0.9839257729739156	0.6	500	minian
474	322	0.48194120937394486	0.9876602088840567	0.8964361428263088	0.9775726253548871	0.6	500	minian
475	163	0.40782742673349703	0.9937700525087911	0.8768410146358582	0.9739406915606291	0.6	500	minian
476	345	0.25775350634461575	0.9944410621416788	0.8382435449132207	0.9817005423828739	0.6	500	minian
477	58	0.5884578014434347	0.9878687301072394	0.9068239877768803	0.9818806004138683	0.6	500	minian
479	341	0.29089295168416224	0.9966080909569689	0.9196547773149543	0.9904496078304724	0.6	500	minian
480	289	0.27588422686539815	0.9954411599046584	0.8060618957733849	0.9774935511721221	0.6	500	minian
481	199	0.3442496592879399	0.9936748755241065	0.8491852779010818	0.9820136009349812	0.6	500	minian
482	316	0.1329455185828514	0.991189894015571	0.8447531545537461	0.9872384320567456	0.6	500	minian
483	367	2.065091477353141	0.8900826925204368	0.46388241161366217	0.49819517124075313	0.6	500	minian
485	403	0.3473212276005293	0.9833475935918877	0.8852279939456873	0.9745095666641593	0.6	500	minian
486	321	0.8226434079035976	0.9788139204014312	0.9458308466314173	0.984628120873052	0.6	500	minian
488	41	0.3231539840842243	0.9845264838319526	0.8668244106471102	0.9819674972486468	0.6	500	minian
489	293	2.4023276145783496	0.9307763276065876	0.7561506791086622	0.8167591857183709	0.6	500	minian
490	176	1.3140697700935782	0.9600332138712262	0.7153476476136653	0.7721823907778477	0.6	500	minian
492	177	0.32647512313278243	0.9885322676091594	0.928365125540668	0.9812783518574693	0.6	500	minian
493	14	0.6061543877281428	0.9801367199552107	0.8715667628796984	0.9691844080353719	0.6	500	minian
494	264	0.10881967882914145	0.9921883385013587	0.8532736688423062	0.9513765480434261	0.6	500	minian
497	63	0.265363275583885	0.9896837533060461	0.9416939003542047	0.983996354911983	0.6	500	minian
498	241	0.22623130835764726	0.9947865723139114	0.8706204287226618	0.9792202278724585	0.6	500	minian
499	206	2.2391781108170963	0.9253911789104794	0.6991883336641936	0.7214195814976401	0.6	500	minian
0	82	0.2549557811749289	0.9976866550146631	0.9758410160749559	0.9908338007689994	1.0	100	minian
1	31	0.19929832502631886	0.9950897551997699	0.9537780415468756	0.9918590899020889	1.0	100	minian
2	10	0.4171275123773251	0.9917128908139067	0.9505809186314121	0.9772662047571343	1.0	100	minian
3	56	0.14017516689765624	0.9970643269638901	0.963888697484468	0.9917524838974384	1.0	100	minian
4	43	0.15669101341532257	0.99323475271111	0.9239566674935262	0.9882939532335792	1.0	100	minian
5	93	0.19939526519326312	0.9958539688317983	0.9887736151249343	0.9895419384197565	1.0	100	minian
6	11	0.10470569820114325	0.9985215924377937	0.960872993844446	0.9956061203664998	1.0	100	minian
7	89	0.04235513704879342	0.9943549595751413	0.9416837197050816	0.9911825110855492	1.0	100	minian
8	52	0.623724718684644	0.9820335414599962	0.9708581814280447	0.9962605343926321	1.0	100	minian
9	7	0.33376097038055713	0.9961682178924327	0.9672501878067777	0.9902922478528772	1.0	100	minian
10	44	0.282542506945935	0.9900372081340383	0.9738853186610255	0.9926905128547096	1.0	100	minian
11	18	0.09744119565635279	0.9974039397923251	0.9673974007504899	0.9876575661796884	1.0	100	minian
12	53	0.23471628667989125	0.9932047468869007	0.9593868583162898	0.9854339784759646	1.0	100	minian
13	25	0.2603257244643455	0.9977532945529772	0.9637945769126981	0.9939998869931723	1.0	100	minian
14	76	0.31402514071419296	0.9950489400009492	0.9620431001453538	0.9929926733976988	1.0	100	minian
15	73	0.10852283199927669	0.9969084788777525	0.9762882363699183	0.9893019570048197	1.0	100	minian
16	2	0.4970409582992768	0.9941678038182616	0.9604335187090471	0.9930570352117207	1.0	100	minian
17	26	0.2656853440564561	0.9977365917472637	0.9804379481489622	0.9905265751231936	1.0	100	minian
18	0	0.15664830231085955	0.9893011244647542	0.9211035936711536	0.9909863519685709	1.0	100	minian
19	51	0.3489423429691673	0.9876742650471863	0.9802685499281393	0.9905776081710738	1.0	100	minian
20	3	0.4868940436316719	0.9927546952729048	0.9502455413062758	0.9868479175346221	1.0	100	minian
21	71	0.17889637274523468	0.9895043807879784	0.9818418638079007	0.9887326178856084	1.0	100	minian
22	59	0.08247687133168222	0.9940408116504064	0.9615902214940618	0.9934185655030162	1.0	100	minian
23	80	0.3244034248746828	0.9943020504903806	0.9491313530774602	0.9893660006401099	1.0	100	minian
24	91	0.07198620657628531	0.9986490655772856	0.9744133275857555	0.9920782372683794	1.0	100	minian
25	40	0.27818787280363333	0.988008620624086	0.977449439946674	0.9884317177516301	1.0	100	minian
26	29	0.3228434537435445	0.9958894182342328	0.9836975361199282	0.9927247833287494	1.0	100	minian
27	84	0.0826079536937747	0.9972641611934596	0.9746652950633149	0.9934223451569464	1.0	100	minian
28	28	0.2209922151268091	0.9848399114364336	0.9586077394983379	0.9941072697131255	1.0	100	minian
29	15	0.3513407028003084	0.9914213545875274	0.9587116408920834	0.9884898937521365	1.0	100	minian
30	24	0.3650378401071038	0.9937639220424389	0.9153290743498946	0.9874651594033419	1.0	100	minian
31	42	0.4187702380863385	0.9935983633333797	0.9118235987140759	0.9899616620947598	1.0	100	minian
32	88	0.21369401468522425	0.991349203327672	0.9712664850331171	0.9953280983165169	1.0	100	minian
33	16	0.2712670131947037	0.9947870462403114	0.9550556192521064	0.9898110566698031	1.0	100	minian
34	61	0.16410232206391495	0.9912340154090543	0.9713704343533164	0.9957045000777063	1.0	100	minian
35	36	0.1714376173584949	0.9912499095251435	0.9316797903112874	0.99351760333648	1.0	100	minian
36	39	0.3450398708408597	0.9889190183752952	0.8933680525300234	0.9901816682885872	1.0	100	minian
37	64	0.04812236399461428	0.9988792938949174	0.9114560391581927	0.9927374091038812	1.0	100	minian
38	38	0.22914842212437647	0.9972178890000468	0.9872256457869281	0.9927315848085942	1.0	100	minian
39	72	0.13283765682680462	0.9963288145534837	0.9675833398808752	0.9911221503180082	1.0	100	minian
40	83	0.2087701597412119	0.9980713751162404	0.9750074518060845	0.993257873088735	1.0	100	minian
41	94	0.631370016418045	0.982231355688474	0.9630171988500883	0.9863358050282816	1.0	100	minian
42	32	0.19862021375053301	0.998995955680045	0.9602953683310911	0.9941410144796241	1.0	100	minian
43	17	0.12216689103946239	0.9974516280361572	0.9734871433049221	0.9936834085056495	1.0	100	minian
44	92	0.16708709119701626	0.9983993037939832	0.9833603121723901	0.991537218766487	1.0	100	minian
45	96	0.2061757400607136	0.996442111592752	0.9737046007014377	0.9894500796892477	1.0	100	minian
46	8	0.2980865002315422	0.9944263858268393	0.9634073639773136	0.9876698888122236	1.0	100	minian
47	70	0.5638728564591697	0.9879993709611435	0.9695289704398524	0.991803660537085	1.0	100	minian
48	41	0.25168849892472045	0.9972606550201263	0.9601647974796303	0.991888026249366	1.0	100	minian
49	81	0.24504906214446184	0.9953671335011649	0.9751446173002983	0.9922103791756832	1.0	100	minian
50	13	0.5994246747002101	0.9817957728347755	0.9662355611046513	0.9776433993075666	1.0	100	minian
51	20	0.1372107350637035	0.9912884803778896	0.9828218865833687	0.9943201019533356	1.0	100	minian
52	6	0.6817517965065296	0.9832838842552546	0.969901470331177	0.9846519165864512	1.0	100	minian
53	86	0.37285532432584817	0.9962785621313383	0.9476469683797782	0.990286430611854	1.0	100	minian
54	21	0.1923950672548768	0.9958044000555882	0.9428325940089283	0.9848179498035605	1.0	100	minian
55	77	0.24268739446162346	0.9941874828081054	0.9657579123254323	0.993537765563139	1.0	100	minian
56	74	0.07455386859143995	0.9991696724393392	0.9681619512580665	0.9959210762435049	1.0	100	minian
57	62	0.17065086849761246	0.9931845100028052	0.9378702511032868	0.9897397361393594	1.0	100	minian
58	68	0.12687965557783643	0.9976072928736572	0.9927081463133777	0.9969928638304024	1.0	100	minian
59	5	0.4294595170669009	0.9918468838809994	0.9759651232710299	0.9893599655212834	1.0	100	minian
60	30	0.3697475755846343	0.9877645924442805	0.8219868390778912	0.9864968447225293	1.0	100	minian
61	45	0.10105478111602206	0.9926151927992016	0.9768818581991102	0.9850412385629336	1.0	100	minian
62	78	0.22099576177900487	0.9951120936679158	0.9742857355333953	0.9946357661661622	1.0	100	minian
63	47	0.3917077012686034	0.9939327046163795	0.9797196305346153	0.9952169784582344	1.0	100	minian
64	57	0.2135654122253818	0.9972200444910599	0.9646226017761754	0.9934444278831599	1.0	100	minian
65	22	0.3158436742776585	0.9884992907089053	0.9547931883181429	0.9884147053428972	1.0	100	minian
66	48	0.4785941746191022	0.97781926639662	0.7471699924788214	0.8186681488822602	1.0	100	minian
67	37	0.0835778509952061	0.998065725792496	0.9673298844216622	0.9897847379825463	1.0	100	minian
68	97	0.3429436283037823	0.9892394877614024	0.9686476829213998	0.9875992384199868	1.0	100	minian
69	34	0.24890125985925712	0.9963125472855564	0.7577408345477523	0.9877128480538518	1.0	100	minian
70	1	0.265329343191113	0.9934862009932143	0.9690201148660565	0.9931601460180287	1.0	100	minian
71	46	0.4784406990316782	0.9886290130864016	0.9598750582985609	0.9897808308391542	1.0	100	minian
72	35	0.07621919573378544	0.9967357372416277	0.9779054403370379	0.9942922968073421	1.0	100	minian
73	98	0.23501220797162514	0.9925480478771369	0.9873657725447565	0.9909946955515739	1.0	100	minian
74	23	0.34675938742871565	0.9935638148950762	0.908554909170937	0.9881463182691577	1.0	100	minian
76	58	0.19939294517188014	0.995540540299923	0.9623215785493999	0.9914487476545168	1.0	100	minian
77	87	0.20354719826903964	0.9930422500780529	0.9564545603031793	0.9936133839705105	1.0	100	minian
78	60	0.3569005583262507	0.9922516106527232	0.9613949949268921	0.9900738261171116	1.0	100	minian
79	14	0.0927318941493434	0.9991587125540041	0.9827675463042044	0.9950296507800372	1.0	100	minian
80	67	0.17824952079496795	0.9986584900208617	0.9574963290374101	0.9869894533440541	1.0	100	minian
81	65	0.06867768957824977	0.9979856606260382	0.9488765284767515	0.9917502076402949	1.0	100	minian
82	85	0.23759062334009845	0.9941623593985591	0.9760436729109536	0.992033264122745	1.0	100	minian
83	33	0.21473522177213156	0.9940746473170026	0.8558705727454995	0.9932194190727539	1.0	100	minian
84	90	0.321891831704095	0.9910654251972275	0.9770756043492468	0.9945993084326238	1.0	100	minian
85	55	0.07940346136697027	0.9939109805310282	0.9777648720608672	0.9915740285549955	1.0	100	minian
86	19	0.1987800143354992	0.9916572835624046	0.9718137266500328	0.9916363608893062	1.0	100	minian
87	75	0.25320196219622976	0.9876642682035708	0.9305568148952665	0.9915859198897908	1.0	100	minian
88	27	0.28716372383021793	0.9953189727527703	0.9692529008823391	0.9926338666275876	1.0	100	minian
89	63	0.4221072447082108	0.9892086089476114	0.946907537363695	0.9911045229467891	1.0	100	minian
90	79	0.2738510549282784	0.9959502640821627	0.9801483881073285	0.9907475200634183	1.0	100	minian
91	95	0.2888095764146066	0.9963255720806656	0.9857479357253734	0.9935659663251533	1.0	100	minian
92	54	0.23427676374924655	0.9939884245893824	0.982174855788983	0.9948479401583066	1.0	100	minian
93	49	0.4869347810056015	0.9878554271576456	0.9609104203369773	0.9819641708797461	1.0	100	minian
94	4	0.10968209984557321	0.995473201438179	0.9749845005122778	0.9908998007746261	1.0	100	minian
95	66	0.09326443014309234	0.9965494610371703	0.9666509911552242	0.9918879746164302	1.0	100	minian
96	69	0.20749739450258395	0.9955033443712735	0.9798915197255618	0.9937358110160112	1.0	100	minian
97	12	0.344858225953914	0.9943128624254242	0.9487091967633702	0.9802218620995643	1.0	100	minian
98	50	0.42036851641422085	0.9945387852611196	0.9754380576169596	0.9905935159365556	1.0	100	minian
99	9	0.057583464589974126	0.996144893706334	0.9808518243900265	0.9937725256523728	1.0	100	minian
0	49	1.110361897526451	0.9634727528659427	0.7922884999294016	0.814493177226653	1.0	300	minian
1	61	0.12860080624687853	0.9990411894838388	0.9042819918103321	0.9927811772679479	1.0	300	minian
2	63	0.15349440825925004	0.9963892679232055	0.9742259981500503	0.9911703134629356	1.0	300	minian
3	132	0.5132493498739693	0.9960370733506219	0.9701965276725683	0.990344556122493	1.0	300	minian
4	27	0.5006936808701442	0.9868184208307496	0.9777646410496645	0.9888885346511342	1.0	300	minian
5	107	0.5027799216649347	0.9909177318448558	0.9571206235743929	0.9884764369802728	1.0	300	minian
6	175	0.3440441312798722	0.9911108196906656	0.9556076138778193	0.9881929188984169	1.0	300	minian
7	13	0.3817769875721552	0.9901763800126125	0.973330182033701	0.990002370212694	1.0	300	minian
8	67	0.12587019379005956	0.9982732158627726	0.9833770153945763	0.9909129640528233	1.0	300	minian
9	54	0.32141674481506577	0.9938833540032771	0.9576473654987675	0.9923794475355708	1.0	300	minian
10	168	0.29752533622211647	0.9942876533628021	0.9686935732503705	0.9931239277796546	1.0	300	minian
11	85	0.29057153164208116	0.9934521002206715	0.9444986666126468	0.9906699834081943	1.0	300	minian
12	79	0.32030352375350823	0.993086379866331	0.9687359130194501	0.9835795248575792	1.0	300	minian
14	26	0.32015734987342637	0.9907103941091954	0.9610752820463649	0.9902409858605209	1.0	300	minian
15	153	0.2615620621797935	0.9912154489245764	0.9404614257813498	0.971129064410124	1.0	300	minian
16	260	0.18751467542064412	0.998450239822293	0.9770260379095984	0.9954946749560433	1.0	300	minian
17	259	0.38782527289796376	0.9886553682931091	0.9597954733040378	0.9903818103810653	1.0	300	minian
18	154	0.6166480038851223	0.9680358363836752	0.9802029326958503	0.9884327775963707	1.0	300	minian
19	23	0.3259823436251759	0.994593388070194	0.9777062882838773	0.9936006297484188	1.0	300	minian
20	217	0.3565454644441859	0.9949003049343204	0.9770464497436003	0.9928595816790164	1.0	300	minian
21	68	0.46844598137302484	0.992308721006065	0.9594803848830339	0.984742685760702	1.0	300	minian
22	160	0.04950754623979797	0.9949591167451308	0.9861668386761888	0.9935506886319956	1.0	300	minian
23	92	1.3818422409543978	0.9510854434804352	0.7417931439277052	0.7496410480626416	1.0	300	minian
24	180	0.7432058460430091	0.9541331565101048	0.8180965173552383	0.8404356181248248	1.0	300	minian
25	126	0.4767964503514022	0.9908112826320448	0.9147538289880847	0.9836940580823705	1.0	300	minian
26	179	0.34162312075891293	0.991871722529372	0.9471885772586076	0.9875896287076932	1.0	300	minian
27	152	0.20277425789927447	0.998326654073861	0.9418280382710872	0.9937791035893394	1.0	300	minian
28	1	0.3317057441600775	0.9870608708609477	0.9719077643010656	0.9942080982002597	1.0	300	minian
29	269	0.20563010403862514	0.9985356214722519	0.9032047131457484	0.9943507763506513	1.0	300	minian
30	239	0.12394346768533293	0.996327223530268	0.9660500666022476	0.993175899255268	1.0	300	minian
32	156	0.2598429641058667	0.9900152322216766	0.9584624802916498	0.9871770923426056	1.0	300	minian
33	215	0.2324824855138666	0.9891548201831716	0.9506786444743792	0.9886920879580097	1.0	300	minian
34	209	0.326259007781697	0.9916353482451046	0.9383448520546963	0.9696178849779105	1.0	300	minian
35	216	0.485856546370857	0.9901038467759169	0.9762952225721139	0.9885836666107018	1.0	300	minian
36	136	0.18478215030447662	0.9956269125637072	0.952553183324253	0.9888505949756063	1.0	300	minian
37	253	0.08273633609185292	0.9988848270309154	0.9828106744352854	0.9958667764198014	1.0	300	minian
38	201	0.38630902922521154	0.9920807230080999	0.9886428931400849	0.9928621843771045	1.0	300	minian
40	218	0.3016069103699021	0.9967116478784261	0.9728333175440301	0.9900633795403772	1.0	300	minian
41	146	0.22164743822194544	0.9938788068378296	0.9689272940188095	0.9918395536012117	1.0	300	minian
42	133	0.26819450715776005	0.996992555294372	0.9390701040014022	0.9927513232143322	1.0	300	minian
43	18	0.15967612403322254	0.9951909822393423	0.959250514383682	0.9934734853791076	1.0	300	minian
44	6	0.15383707045247896	0.9965485392841448	0.9743030749694147	0.9920943099934423	1.0	300	minian
45	11	0.0690022143284493	0.9959891202089353	0.9653883276239349	0.9920239419986638	1.0	300	minian
46	29	0.24939753401127318	0.9949166348455141	0.979932429363215	0.9948709486039748	1.0	300	minian
47	72	0.2311303785194551	0.9977151574388606	0.9563995518349041	0.991390184621094	1.0	300	minian
49	94	0.35863094084847963	0.98618631050187	0.9153862917239768	0.9888255217794001	1.0	300	minian
50	86	0.09155073274539713	0.9981227580708493	0.9525513539091071	0.99136014258518	1.0	300	minian
51	73	0.11734457531130903	0.9981038585063197	0.9647305549916547	0.9946014744672336	1.0	300	minian
52	278	0.33371152463403037	0.9942253099485497	0.9623817895889564	0.9899330606796369	1.0	300	minian
53	102	0.3082518349649567	0.9938443435701576	0.9588077361373928	0.9911611321552343	1.0	300	minian
54	143	0.09049338924510772	0.9979123441016345	0.9555413860590913	0.9925450655447411	1.0	300	minian
55	164	0.3957318353979531	0.9903321172949159	0.9580594142878845	0.9874728086871266	1.0	300	minian
56	210	0.4115932222079455	0.9815099823137443	0.973284412890304	0.9941695461065294	1.0	300	minian
57	84	0.08626422972988233	0.9976703595612829	0.9685847325639343	0.9883933222958049	1.0	300	minian
58	17	0.3949369034729168	0.9927045781080618	0.974895662700425	0.9918461723933831	1.0	300	minian
59	100	0.20682168939022672	0.9960932066037729	0.8884960929792507	0.9820571398079249	1.0	300	minian
60	186	0.3158801192435014	0.9897744051955919	0.9437556340870311	0.9895962481129477	1.0	300	minian
61	276	0.2590481334502622	0.9977119230076474	0.9853932466065398	0.9916012114703292	1.0	300	minian
62	45	0.2911138022520647	0.9882514657846383	0.9633415464591701	0.9865543746467024	1.0	300	minian
63	82	0.10255193248423713	0.9982449980133765	0.959779232198818	0.9820164973148354	1.0	300	minian
64	47	0.23385120251831143	0.9954825733293332	0.9726212768857286	0.991504212392772	1.0	300	minian
65	195	0.15477925497721998	0.9975507060490939	0.9714895568640756	0.9918816059532735	1.0	300	minian
66	162	0.2768964953512218	0.989142296909627	0.9408881439134735	0.9888554632397806	1.0	300	minian
67	25	0.19169863714057098	0.9976596726914312	0.9735626008446873	0.9901632734887147	1.0	300	minian
68	81	0.2096639702287809	0.997201983546008	0.9787794314039273	0.9923895537015722	1.0	300	minian
69	275	0.40301673139364885	0.9921773054624939	0.9537016094352839	0.9903679522165384	1.0	300	minian
70	189	0.12588703336673357	0.9989669772628442	0.9444217711415869	0.9926147275865631	1.0	300	minian
71	277	1.5317425071247186	0.9564777116624819	0.7820306535879966	0.8008377368302201	1.0	300	minian
73	117	2.4258177952951465	0.8100125349105715	0.8102250154824286	0.9588976762205493	1.0	300	minian
74	252	0.11024144625249598	0.9983108100663519	0.9547092605040678	0.9944687133644093	1.0	300	minian
75	111	0.9073831465253592	0.9742856455077712	0.6029247067124351	0.7142515046827574	1.0	300	minian
76	103	0.09944015212930309	0.9985773901648821	0.9841040484330523	0.9927079696370981	1.0	300	minian
77	183	0.5110531100167943	0.9916116004915049	0.9868811040397706	0.9851901973448349	1.0	300	minian
78	163	0.34538422024239146	0.995154033483909	0.9331813676651639	0.986371638658025	1.0	300	minian
79	14	0.2514309176627508	0.9909815953145175	0.9626989305879711	0.9918142805038695	1.0	300	minian
80	172	0.25343281796561523	0.996163013100696	0.9612820273031892	0.9856720460865429	1.0	300	minian
81	19	0.3461644625280397	0.9936784617323934	0.9834609042721105	0.9902945045934476	1.0	300	minian
82	125	0.3416194904139358	0.9946323511229022	0.963324204505498	0.986007777734428	1.0	300	minian
83	241	0.14353465501892892	0.9964568859470341	0.9872904512894948	0.9952078378548564	1.0	300	minian
84	24	1.5629594940755704	0.9519797558337347	0.7795459513822866	0.8369569671776149	1.0	300	minian
85	265	0.22563432657147792	0.9965542635580816	0.9813204936604185	0.9934926308086033	1.0	300	minian
86	83	0.14335175629445587	0.9971917609254953	0.9741934310773994	0.989924145328447	1.0	300	minian
87	16	1.184600044722621	0.9780662513968782	0.727076953148251	0.7621151339084703	1.0	300	minian
88	135	0.07286529701788187	0.9956281660896482	0.962847963298781	0.9926148416577172	1.0	300	minian
89	141	0.10135375363858543	0.9847156151780194	0.9831590107380082	0.9929196458165803	1.0	300	minian
90	138	1.8439073659655607	0.9457254256404349	0.8041585411053485	0.8214976566975805	1.0	300	minian
92	70	0.3041631753426581	0.9950517452617863	0.9329684616000712	0.979420411530671	1.0	300	minian
93	205	0.5660757219228003	0.985142010393572	0.9789877988377019	0.9854713339879898	1.0	300	minian
94	99	1.8090098270127364	0.9347013909933964	0.7068562790261714	0.7510684890786726	1.0	300	minian
95	53	0.28103511986061563	0.9924593058507906	0.8909975457203813	0.9911330275732924	1.0	300	minian
96	199	0.14009548636288047	0.9977726996049285	0.8812970321253174	0.9905991580924722	1.0	300	minian
97	197	0.07902053252607877	0.99401022110944	0.9632102608245002	0.9928435214527419	1.0	300	minian
98	88	0.3310157956464732	0.9933500577034527	0.9792479020454624	0.991847918775543	1.0	300	minian
99	266	0.32615759841849734	0.9875871813709561	0.9653707835782991	0.991508271473246	1.0	300	minian
100	93	0.36807298493320056	0.9907401486624047	0.973515514025452	0.9883895910524438	1.0	300	minian
101	108	0.29254319526733313	0.9933015153725584	0.9625414891512977	0.9869328237237179	1.0	300	minian
102	192	0.04567992739018571	0.998157927708186	0.9714334706460579	0.9921644823179347	1.0	300	minian
103	140	0.3018552153041889	0.9939149663522644	0.9645309754531158	0.9931376419435292	1.0	300	minian
104	50	0.14380502972300327	0.9936707250055732	0.9566327046571971	0.9854121963025348	1.0	300	minian
105	193	0.27861491846797504	0.9945957108616093	0.8935534555257237	0.9868518895231372	1.0	300	minian
106	245	0.1956423467349635	0.996242667571505	0.9701800353053576	0.9950256198135007	1.0	300	minian
107	59	0.14547020496343083	0.9975874701009904	0.9316193546519668	0.9867840902235443	1.0	300	minian
108	177	0.3674696405499264	0.9927010036418468	0.9544815208567963	0.9833477556311164	1.0	300	minian
109	227	0.2526399693610716	0.9983751139828763	0.9786505383535478	0.9928595196998679	1.0	300	minian
110	110	0.542335560495492	0.9840285576019305	0.9617079899420454	0.9917980659649469	1.0	300	minian
111	271	0.2415758127129333	0.9972957400703203	0.9752598641295812	0.9901484800870672	1.0	300	minian
112	196	0.3128476220779951	0.9878295203751792	0.9641234597013321	0.9895933926483798	1.0	300	minian
113	250	0.0703600551482144	0.9983229252751521	0.9859161719004647	0.9926227324645094	1.0	300	minian
114	272	5.910952480870199	0.7780763240358102	0.7190476866752232	0.747181240480901	1.0	300	minian
115	20	0.09953890045479319	0.9939804032684361	0.96843808709411	0.9918700239564479	1.0	300	minian
116	8	0.0938742700435634	0.9976784501934286	0.9866651631292231	0.9952030314877197	1.0	300	minian
117	242	0.1924683778810764	0.9982776061382425	0.943380632814796	0.9915513254103357	1.0	300	minian
118	134	0.20729078491840733	0.9956652658937876	0.9810666990455877	0.9857884808029818	1.0	300	minian
119	48	0.3450494802121147	0.9949196628525862	0.9648570146027169	0.991359937594369	1.0	300	minian
120	77	0.2846365510809797	0.9925304462986391	0.9318674658508456	0.9873572462152506	1.0	300	minian
121	238	0.3061920725713151	0.9943576183454618	0.9556470723339878	0.9940364596220319	1.0	300	minian
122	274	0.2891821718897149	0.9966532098232739	0.9955695423842658	0.9958558350749032	1.0	300	minian
123	2	0.28425907463065214	0.9958122822778435	0.9749370951199371	0.9949963622637896	1.0	300	minian
124	112	0.39393484392414113	0.9938903475553106	0.9586472465486464	0.9869980660147126	1.0	300	minian
125	12	0.29969568243497685	0.9938417503618258	0.972429947238853	0.9928956329114205	1.0	300	minian
126	129	0.43370058852567933	0.9899797057996036	0.9815726716973494	0.9865470820532515	1.0	300	minian
127	114	0.3145835850223388	0.9924460352390273	0.954668768094157	0.9841162108847977	1.0	300	minian
128	89	0.31705933718665363	0.9960360155412731	0.9803757810556648	0.9924904894138297	1.0	300	minian
129	230	0.39740421191985115	0.9913507785611823	0.9781741832386094	0.994347176244814	1.0	300	minian
130	176	0.45892992556982837	0.9872427610559715	0.923737752007249	0.9861903475497791	1.0	300	minian
131	240	0.1220313163428686	0.9985470629645097	0.9494895339253941	0.9875262214017766	1.0	300	minian
132	228	0.11353678780232504	0.9989091858565843	0.9787620844756514	0.9918058256817825	1.0	300	minian
133	7	0.15814020651216718	0.9976784647891334	0.97642608020599	0.9948706241992156	1.0	300	minian
134	224	0.42452577658777657	0.9798536056933141	0.9718817022137306	0.9906631728438992	1.0	300	minian
135	22	0.4204849255897542	0.9931438431094266	0.9670043319592778	0.9898067721281676	1.0	300	minian
136	90	0.2693540656541786	0.9976001550507198	0.9690692876769834	0.9895330188708694	1.0	300	minian
137	122	0.27182019333010765	0.993394690157572	0.955780653006534	0.9916595602650004	1.0	300	minian
138	10	0.23561236626333695	0.9975436047288685	0.9667197694786855	0.9889169730649232	1.0	300	minian
139	255	0.22496922567871094	0.9977492405096834	0.9830547863084108	0.9923901268668915	1.0	300	minian
141	185	0.411441329328354	0.9934919514930731	0.9417201050942279	0.9860069270875416	1.0	300	minian
142	69	0.18003569961579854	0.9980482267588577	0.9727774551190984	0.9948576413877824	1.0	300	minian
143	91	0.338412055509346	0.9953951652580488	0.9478762313629071	0.9877569756430912	1.0	300	minian
144	43	0.4175569469115536	0.9923141350832483	0.9836879430345787	0.9846998171785813	1.0	300	minian
145	3	0.46289838396683597	0.9891418030925672	0.9660150448925763	0.9921370285199931	1.0	300	minian
146	149	0.06836448835674407	0.9987977136254012	0.969277963735811	0.9927098204318215	1.0	300	minian
147	200	0.9439758475575968	0.9704484673923615	0.7821990598606681	0.7815251552708515	1.0	300	minian
148	194	0.14061825212117487	0.9938372369918325	0.9384335527381029	0.9913697727197482	1.0	300	minian
149	104	0.21260427236156013	0.9961985693487709	0.9592106964634118	0.9935876679536041	1.0	300	minian
150	78	0.42374111252873653	0.9938250077716938	0.968744389394925	0.9860119938677703	1.0	300	minian
151	128	0.9314290565927014	0.9758983567385673	0.8555326996773515	0.9064832883957834	1.0	300	minian
152	36	0.07143446639537943	0.9947598658779339	0.9847104679907828	0.9904061760409553	1.0	300	minian
153	219	0.12622529225251822	0.9932224052288974	0.9453470898836702	0.9873132855140762	1.0	300	minian
155	187	0.03399325688068065	0.9936386540275791	0.967159185610087	0.9935053365817069	1.0	300	minian
156	262	0.24831336960915476	0.9973732703512986	0.9686534309830318	0.9961994843724175	1.0	300	minian
157	38	0.4530413748859302	0.9908648286722703	0.922026992383519	0.9897663312058513	1.0	300	minian
158	267	0.32189612332030587	0.995315285765122	0.9434519860888155	0.9935947431403759	1.0	300	minian
159	157	0.2313194308556179	0.9930470021791444	0.9711666566380034	0.9911195935608335	1.0	300	minian
160	207	0.20743643980699336	0.9957804171830588	0.9571092529140528	0.9907517653910297	1.0	300	minian
162	31	0.18665681927637232	0.9973514962019021	0.9307955212713405	0.9911846017373551	1.0	300	minian
163	181	0.39630858000966984	0.9915132594762598	0.9727939614042534	0.9825917804242729	1.0	300	minian
165	214	0.43383316364096897	0.989553767927888	0.979454665589726	0.9935202363024903	1.0	300	minian
166	208	0.06480490877038915	0.9849532642349921	0.963423001050507	0.9931486099052158	1.0	300	minian
167	151	0.03295290939069821	0.9971146208124454	0.9646992778806968	0.9913024684253144	1.0	300	minian
168	80	0.01470374154708951	0.9976026063928533	0.9854008788181858	0.9939785996191675	1.0	300	minian
169	137	0.3200376073488979	0.9910921261727632	0.9684007787014719	0.9889821957185093	1.0	300	minian
170	191	0.1266635405204146	0.9982153717882377	0.9437168309385223	0.9931178251312763	1.0	300	minian
171	251	0.1652545693830186	0.9979110940180963	0.9222295476561926	0.995244740484319	1.0	300	minian
172	202	0.12133383360564495	0.9960967642107552	0.9682085516334255	0.9949386608286723	1.0	300	minian
173	235	0.06582207706073137	0.9943533869356525	0.9695391950672906	0.9899550586072012	1.0	300	minian
174	225	0.40083950292957904	0.9921422161108427	0.901896901773854	0.9897222305903288	1.0	300	minian
175	42	0.021452855513064407	0.9987928972830904	0.9764966523438853	0.9943206744960941	1.0	300	minian
176	234	0.30389592561934026	0.9975185239909774	0.9811367528370466	0.9930965083054745	1.0	300	minian
177	203	0.07779546621956679	0.9969437095817615	0.9769580874942242	0.9948851613800325	1.0	300	minian
178	273	0.25158840832348295	0.995491414132681	0.9755594285025645	0.9966100008546631	1.0	300	minian
179	124	0.08342128460323874	0.9970826004014345	0.9775124316415398	0.9878289323402336	1.0	300	minian
180	258	1.1780719618565305	0.9657957354496068	0.7206077657697568	0.7586824995486264	1.0	300	minian
181	190	0.2526609743210657	0.9957028696071545	0.9793384616451347	0.9918719453077726	1.0	300	minian
182	65	0.12406476426741717	0.9972844079792385	0.9748464593973152	0.9933565491483569	1.0	300	minian
183	263	0.09804297063628431	0.9946710780607948	0.9811050310121775	0.9887780521581069	1.0	300	minian
184	33	0.058176269974838116	0.9992631730478279	0.9787797959524976	0.9863604471301562	1.0	300	minian
185	35	0.22662272741265962	0.9976795254182489	0.9651808751801895	0.9918215748427632	1.0	300	minian
186	87	0.140415459589449	0.9737915655430764	0.9733835764193576	0.9917157637915585	1.0	300	minian
187	247	0.3089333520849039	0.9883163329275807	0.9609661965415844	0.9901967709663974	1.0	300	minian
188	270	0.8131578014902034	0.9857456068253287	0.9604065773749576	0.9886857023817903	1.0	300	minian
189	159	0.08554115050274647	0.9976628017400072	0.9615352693471777	0.9901368899066535	1.0	300	minian
190	9	0.3924374175898946	0.9905207332564825	0.9840137649653895	0.9809877049122576	1.0	300	minian
191	220	0.3622149181897003	0.9953096654841223	0.9685466633158686	0.9939356721695777	1.0	300	minian
192	130	0.35946538287855284	0.9763455274688241	0.9562632564062566	0.9892431477701563	1.0	300	minian
193	109	0.09906605661452263	0.9974713336271139	0.9669494193072408	0.9885606718690693	1.0	300	minian
194	98	0.23110419219995615	0.9938402952353897	0.9778836778296957	0.9858346038381316	1.0	300	minian
195	139	0.24057981147350044	0.9953453253098289	0.9755390157194246	0.9932450020385392	1.0	300	minian
196	142	0.3015739673063795	0.9908014181880036	0.9723872176330816	0.9905512628460907	1.0	300	minian
197	174	0.259180734371755	0.9922917257011273	0.9798983199811061	0.9921216028325989	1.0	300	minian
198	222	0.1566680203281983	0.9983586298812579	0.9777383200106798	0.9905515465647321	1.0	300	minian
199	204	0.09077002639797065	0.9981399442283132	0.9887733571710887	0.992899389707541	1.0	300	minian
200	249	0.2245114185657986	0.9970018872438915	0.9440051099090679	0.9891004925283724	1.0	300	minian
201	115	0.45285308642853356	0.9930150621111787	0.9810932837200742	0.99395547799712	1.0	300	minian
203	184	0.09994722367333507	0.9975209832865967	0.9706538561791668	0.9909470811731677	1.0	300	minian
204	212	0.13415340447629484	0.9978260771432633	0.9728827256931628	0.9918792737250645	1.0	300	minian
205	170	0.08548957230305937	0.9955384008889003	0.9845203149374094	0.9888787426525504	1.0	300	minian
206	106	0.16074618758408823	0.9839704551767049	0.9816146084435007	0.9915736738539	1.0	300	minian
207	123	0.433476156029939	0.9945910820997934	0.957385572242905	0.9885841259310673	1.0	300	minian
208	248	0.12454228240546518	0.9967904591374942	0.9844106432338632	0.993223546389266	1.0	300	minian
209	173	1.4334976620262665	0.9647528272813459	0.8823716297984061	0.8986028780466235	1.0	300	minian
210	4	0.28318442321998893	0.9948784448643935	0.9545590756729722	0.9942709272828842	1.0	300	minian
211	169	0.2579575143291328	0.9968320234044674	0.9276213762698106	0.9758977051593567	1.0	300	minian
212	52	0.0672171349037997	0.99398065632885	0.9584339006775768	0.9877330608687092	1.0	300	minian
213	232	0.15277553007727898	0.9878273952557445	0.9783594901570234	0.98833280583723	1.0	300	minian
214	39	0.21242790657193134	0.9972353328904877	0.9197613050340774	0.985760739024272	1.0	300	minian
215	30	0.027866269079068706	0.9954774660795535	0.9589674719143569	0.9918138669409468	1.0	300	minian
216	96	0.7848296959535959	0.9758622333523898	0.6988311839149172	0.6986185842982995	1.0	300	minian
218	188	0.2850872244714907	0.9893824297712417	0.9754269682711725	0.9866720214711271	1.0	300	minian
219	58	0.13669074501991668	0.9978832726273921	0.9594413614818424	0.992772965846094	1.0	300	minian
220	118	0.4353957829650158	0.987735610042061	0.9559714498692	0.9900114566961661	1.0	300	minian
221	236	0.173598004078362	0.9975341493951371	0.9885897135671726	0.9940169670787392	1.0	300	minian
222	131	0.2140031550916297	0.9963571455848739	0.9530049636441537	0.9807330440919851	1.0	300	minian
224	0	0.37214096760250637	0.9957142091975776	0.9472444356154789	0.989906799458245	1.0	300	minian
225	105	0.21299397377420548	0.9977693552362106	0.9616875721702883	0.9921481134543788	1.0	300	minian
226	144	0.31374652253802765	0.9962987977670386	0.9530187048378725	0.9908620022775423	1.0	300	minian
227	261	0.13903644255982417	0.9973791723392835	0.9759499933588821	0.9918407462769802	1.0	300	minian
229	21	0.20572721419537743	0.9966559523621963	0.9801234198096582	0.9911228599697897	1.0	300	minian
231	41	0.2855742124278601	0.9952775538556846	0.9618154159180812	0.9862569587115891	1.0	300	minian
232	64	0.20781328856013784	0.9952102557831537	0.9699930717167635	0.9854868802951853	1.0	300	minian
233	256	0.3131333250236489	0.9946299167388991	0.9811034199615466	0.9922923587676862	1.0	300	minian
234	34	0.25502600024162947	0.9951786950461998	0.9781200645236517	0.9900613007452339	1.0	300	minian
235	121	0.4422734621984939	0.9923554047825992	0.9271546350629649	0.9884036803148383	1.0	300	minian
236	66	1.6700351779131777	0.9386391295826372	0.762318442403447	0.7944510941531646	1.0	300	minian
237	95	0.3340805084341346	0.9872866112461421	0.914934302962929	0.9815631475064415	1.0	300	minian
238	46	0.10762610584728337	0.9968052543490513	0.9435388919522595	0.9837453830265307	1.0	300	minian
239	127	0.1869144833855186	0.9947713037789544	0.9798570106023057	0.991832660192744	1.0	300	minian
240	28	0.46935470995498274	0.9885984382776231	0.9629183487557791	0.9844139785824196	1.0	300	minian
241	198	0.15143581784855698	0.9978097796741118	0.958689913104388	0.9897733585889393	1.0	300	minian
242	40	0.1353597916675473	0.9983245348128336	0.9585340283001591	0.9916218169624965	1.0	300	minian
243	221	0.20096700209638405	0.994062935436031	0.920033269830257	0.9904588795660574	1.0	300	minian
244	147	0.37353287173943317	0.9922923421379111	0.937948215340591	0.9878283209643934	1.0	300	minian
245	44	0.39705337002658947	0.9874115876442537	0.963073871826517	0.9883569779897043	1.0	300	minian
246	264	0.34184180644474144	0.9949990407559347	0.9820812320128114	0.9933786334253377	1.0	300	minian
247	161	0.12955652849400337	0.9968547987926154	0.9561398094358214	0.991299302756131	1.0	300	minian
248	243	0.3483314216292255	0.9969070048504682	0.9918715200465119	0.9927321586581758	1.0	300	minian
249	167	0.19357231093799798	0.9973593996927586	0.9657193397484665	0.9891964729799233	1.0	300	minian
250	55	0.42002561959448803	0.9929264565764934	0.962326193805993	0.988012652738051	1.0	300	minian
251	257	0.3989558561440224	0.9927147756967257	0.9750196361341923	0.9879043608462286	1.0	300	minian
252	145	0.9259085928498206	0.9808909352211098	0.8432068495046955	0.8484394765756013	1.0	300	minian
253	254	0.07192078640470403	0.9951218852151018	0.8757477556514572	0.9935792727471038	1.0	300	minian
254	120	0.3983874596023071	0.9939544648640185	0.9711646164744062	0.9916422822463116	1.0	300	minian
255	211	0.10327661408798251	0.9968125371273692	0.9259669028102876	0.9836617718251205	1.0	300	minian
256	237	0.1995023819531759	0.9973769622208304	0.9924491166940655	0.9968725784831963	1.0	300	minian
257	171	0.29266686516318235	0.9969185373392563	0.9581379363525628	0.988488144607285	1.0	300	minian
259	229	0.12764450548584058	0.9966082455064044	0.9638249036018531	0.9860595163657476	1.0	300	minian
260	213	0.1533824275386572	0.9924610889374558	0.9652867386023377	0.9943369860520185	1.0	300	minian
261	182	0.280931197159572	0.9949093007653075	0.9689281844822845	0.984539257873323	1.0	300	minian
262	150	0.579026288255012	0.9875222234653138	0.9777909147421336	0.9882100675831125	1.0	300	minian
263	15	0.46090237542406315	0.9907811515578773	0.9753480870031975	0.9875814809996922	1.0	300	minian
264	223	0.1766892483445436	0.9958523088858982	0.9191668207803125	0.9757424847755622	1.0	300	minian
265	268	0.23337176450452835	0.9968746045869539	0.9396596163872484	0.9940466726575563	1.0	300	minian
266	206	0.23541980823836448	0.996500260201593	0.9536981900070353	0.9915613490893405	1.0	300	minian
267	148	0.2302669711274184	0.9947125121336993	0.9605746921717603	0.9929472822626035	1.0	300	minian
268	155	0.32539835223981695	0.989462273072468	0.9593782127441979	0.987449964677561	1.0	300	minian
269	76	0.13722302864282385	0.9969909656529962	0.9874230931975889	0.9944253950278114	1.0	300	minian
270	71	0.27424468571681315	0.9938324172431808	0.96448217375729	0.9939049155581402	1.0	300	minian
272	62	0.1956821039690993	0.9981224074870435	0.9423599747755458	0.9919022444949347	1.0	300	minian
274	56	0.36270150621842223	0.995216588488998	0.8385880930296907	0.9772568884606379	1.0	300	minian
276	178	0.29176225991237015	0.9914510229796979	0.9516833232445363	0.9877205230473821	1.0	300	minian
277	246	1.640252760514356	0.9536593486217281	0.8057798805850613	0.8504832401556494	1.0	300	minian
278	101	0.43020503052070025	0.9930086855652893	0.974841274568803	0.9898599155782647	1.0	300	minian
279	119	0.22288246864294636	0.9980023053262284	0.9784519838639629	0.994081708993097	1.0	300	minian
280	158	0.27359798721006306	0.9940841414657665	0.9867246797468598	0.9917826771754671	1.0	300	minian
281	60	0.08957056314661704	0.9934779877623909	0.9544670400622987	0.9897294659889414	1.0	300	minian
282	74	0.3913176479289451	0.9932723122855365	0.9653860992901372	0.993750524757786	1.0	300	minian
283	97	0.11417724336050782	0.9988270195276138	0.9470255750751189	0.9870048698896593	1.0	300	minian
284	75	0.4127792924065688	0.9923295929805038	0.9505482681148254	0.9811258708278348	1.0	300	minian
285	231	0.22145274721053168	0.9918704962059655	0.9760471800122813	0.9955109475843862	1.0	300	minian
286	233	0.24346178787479725	0.9930918193761387	0.9738335257072337	0.9916263525806401	1.0	300	minian
287	226	0.26958370484927713	0.9921041742507943	0.9868704840361094	0.9917312439715198	1.0	300	minian
288	113	0.405262534210591	0.9896930746940755	0.9671319431077281	0.9886565478173605	1.0	300	minian
289	51	0.2993244339170748	0.9868625910919291	0.9430070401625195	0.9850328405911919	1.0	300	minian
290	32	0.24062592632013344	0.9933276277283072	0.9666393553829135	0.9940894886289895	1.0	300	minian
292	116	0.13698363535260852	0.9939476546548973	0.9536659110211974	0.9762761105099718	1.0	300	minian
293	37	0.32554276857973397	0.9916980871271868	0.9625112001310744	0.9875375465991756	1.0	300	minian
295	5	0.1338371714288058	0.9933933632331599	0.9456905951440912	0.9933142796106417	1.0	300	minian
296	57	1.9626241986305368	0.9381097737658667	0.6926024264825925	0.711067327100503	1.0	300	minian
297	165	0.14966015175615524	0.9975310300418587	0.964617755125429	0.9923503759519658	1.0	300	minian
298	244	2.1439903052146327	0.9335796905415564	0.7313761940969927	0.7850752317065084	1.0	300	minian
299	166	0.14756313296902449	0.9982913197599861	0.898876029277972	0.9945747641889746	1.0	300	minian
0	139	0.3351386369437331	0.9933014178540026	0.9773811193591311	0.9928094217531651	1.0	500	minian
1	244	0.25743244065114446	0.9920248517669211	0.9646579185445091	0.98803053069814	1.0	500	minian
3	176	0.04069465151875005	0.9964238700957436	0.9300786861114714	0.9899510838018672	1.0	500	minian
4	91	0.3375493622910234	0.9901589142265348	0.7421606518086284	0.7481231335448401	1.0	500	minian
5	141	0.06975409627373048	0.9963082863424062	0.8853139263935792	0.9948999221190753	1.0	500	minian
6	415	2.519077702268488	0.8398825125343593	0.6486376553080178	0.827090099247317	1.0	500	minian
7	92	0.4611071656668806	0.9941292860552289	0.9749630671576246	0.9940771177644331	1.0	500	minian
8	3	0.5809879852908899	0.9879153810438865	0.8630100985324223	0.8915726414113404	1.0	500	minian
9	287	0.3819821668706239	0.9937654483206833	0.918083821447125	0.9780174869233027	1.0	500	minian
10	259	0.5332446276638703	0.9882404467856446	0.9626011019821811	0.9887202316460529	1.0	500	minian
11	149	0.20679619828789206	0.9913206419850324	0.9627629061610443	0.9911880411125572	1.0	500	minian
12	365	2.345549832213262	0.8776325003937813	0.9009422610326894	0.9101588579665632	1.0	500	minian
15	59	0.32582895523574734	0.9939009261354969	0.9446785197659856	0.9907247080173194	1.0	500	minian
16	65	0.25421358215824896	0.9958012598403192	0.9605941905120525	0.9913511966045044	1.0	500	minian
17	320	0.39255849524272457	0.9920452574918166	0.9636846439803581	0.9835267106124638	1.0	500	minian
18	376	0.20317805315659204	0.9934370815403167	0.9771671398135972	0.9871501959955307	1.0	500	minian
19	257	0.32915830075228814	0.9863808336693616	0.7502064727258343	0.784084194819385	1.0	500	minian
21	323	0.36711647816742404	0.9899860291960298	0.9408228614761317	0.9867923346432365	1.0	500	minian
23	307	0.2074738856292923	0.9888036534811682	0.9677109152716041	0.9888689630449508	1.0	500	minian
24	22	0.11382937896180292	0.9981287248127815	0.9686140763629988	0.9926824679903762	1.0	500	minian
25	265	0.6000127165116431	0.9881309116879304	0.9546934664764081	0.9844648226517823	1.0	500	minian
26	227	0.3414917152571414	0.995434120923872	0.9526869315463271	0.9928852967713966	1.0	500	minian
27	155	0.13060298247200713	0.9926843551559505	0.9694188453181993	0.9917125740953633	1.0	500	minian
28	330	1.9214660372175316	0.9257676569736514	0.7236012695949237	0.7269303594072023	1.0	500	minian
29	193	0.062771213645482	0.9975696710860874	0.962368697947263	0.992113595498576	1.0	500	minian
31	7	0.1441372269158888	0.9973137557176011	0.974145441344355	0.9898007865244627	1.0	500	minian
32	395	0.183873398221861	0.9938096021916537	0.9833640846410113	0.9949432791260211	1.0	500	minian
33	298	0.017430558407722306	0.9946572633064822	0.9533248236230432	0.9853339060761065	1.0	500	minian
34	289	0.1309251596540041	0.9971451288482888	0.9533572778819076	0.9936967125454594	1.0	500	minian
35	252	0.5574526023269483	0.987734833464507	0.925673414686616	0.9817792331585848	1.0	500	minian
36	304	0.32327436948885563	0.9764723651205842	0.9584514006684481	0.9850482703211125	1.0	500	minian
37	154	0.09780447317528192	0.9976164991653407	0.9618742401860836	0.9925254231138487	1.0	500	minian
38	119	0.1438730351230038	0.9964489660991951	0.9738118078863203	0.9939459520246705	1.0	500	minian
39	100	0.1461637209054886	0.9946116225010404	0.9628491105278463	0.9925037837646484	1.0	500	minian
41	355	0.19656294681392905	0.9965841231287378	0.9589027479446903	0.9938241215625778	1.0	500	minian
42	35	0.15213804245018855	0.995656513467152	0.9655036588342409	0.9917034644600983	1.0	500	minian
43	143	0.14022083269239374	0.9923190820182566	0.9379901997177359	0.9879320048615629	1.0	500	minian
44	321	0.19467900571982047	0.9942925623270046	0.986925371264146	0.99110665325549	1.0	500	minian
45	161	0.08579330448444368	0.9976665217046985	0.9699481101397633	0.9917590854177089	1.0	500	minian
46	325	0.42042121905373225	0.9885652569076427	0.950911119628646	0.9856949720317464	1.0	500	minian
47	123	0.09604912955207655	0.9979292371372389	0.9801259695365134	0.99299758474521	1.0	500	minian
49	301	0.5633656079881841	0.9878480151972062	0.9544369812591271	0.9619724605550772	1.0	500	minian
50	281	0.11235880225988838	0.9978706738668215	0.9718077412653494	0.9878691617219407	1.0	500	minian
51	205	0.27225029063079004	0.990495058281627	0.9573847341764065	0.9875331160907279	1.0	500	minian
52	130	0.19872052801452714	0.9976681752119955	0.9841778624209367	0.9909069791214405	1.0	500	minian
53	173	1.2014162682716125	0.9520368569811153	0.8379871946963239	0.8898660754581607	1.0	500	minian
54	12	0.4333301339893529	0.9905778013315495	0.9687280127065423	0.991010976102515	1.0	500	minian
56	225	0.2551723277866787	0.9933936545896812	0.9553858656250803	0.9899264179453137	1.0	500	minian
57	172	0.38756457967777846	0.9908222551537723	0.9714778372686059	0.9916111762866152	1.0	500	minian
58	131	2.264890295098448	0.894523486010263	0.6503508272312518	0.6558099926844805	1.0	500	minian
59	198	0.09492806682394823	0.9968129651505484	0.959241116786303	0.9901766528997394	1.0	500	minian
60	150	0.11982766004424066	0.9981020856017587	0.9612568979621203	0.9941753538039562	1.0	500	minian
61	408	0.3569797480135409	0.995308079759104	0.9756928027212053	0.9851149903237075	1.0	500	minian
62	180	0.2494141438323192	0.9868645954723849	0.9602577779105486	0.9864447692416518	1.0	500	minian
63	38	0.2667912303315828	0.988710152539028	0.8698526957008466	0.9719923403209761	1.0	500	minian
64	297	0.2327997145092207	0.9973838007806073	0.9876471510318037	0.9925408215392514	1.0	500	minian
65	243	0.2805155261455492	0.994128446339238	0.9445790957444563	0.9885512110304587	1.0	500	minian
66	430	0.540133536950323	0.9908388745946095	0.941071362795161	0.9842175006784105	1.0	500	minian
67	145	1.310083358822695	0.9594335185461832	0.7698090445868128	0.8340394108752728	1.0	500	minian
68	109	0.48282005152283275	0.973069818402231	0.9372788221751522	0.9894878054389511	1.0	500	minian
69	418	0.4018892132253353	0.9916191293566446	0.9423553212167404	0.9848967426282815	1.0	500	minian
70	427	0.5317795991110049	0.9892498542775191	0.9583067448791437	0.9904991397680281	1.0	500	minian
71	283	0.5169993108551862	0.992312180575597	0.9516293047894729	0.9811309159040951	1.0	500	minian
72	411	0.16106783404286654	0.9937295393342499	0.9595044574569361	0.9920754020553696	1.0	500	minian
73	207	0.16183091010096265	0.9924561702782034	0.9716477916442241	0.9921150026360338	1.0	500	minian
74	28	0.33820049006044417	0.9926493589597195	0.9683135012455634	0.9899989657000277	1.0	500	minian
75	200	0.20042092274859763	0.9826146225093224	0.9658817836095535	0.9905346870785278	1.0	500	minian
76	269	0.08034577880530747	0.9974437365378012	0.9307592814188239	0.9953212298502072	1.0	500	minian
78	134	0.27318603082054566	0.996232997810764	0.9819642278001333	0.9931646531360017	1.0	500	minian
79	37	0.15183433755406714	0.9925718651009071	0.974515026592159	0.9897419251835615	1.0	500	minian
80	267	0.05194627936790414	0.9938862600449293	0.9770525845387603	0.9922794901941063	1.0	500	minian
81	15	0.24893200243711847	0.9953576513240271	0.9678395864017316	0.9819178546809308	1.0	500	minian
83	344	0.5110504272073075	0.9903330470439979	0.9336241841402966	0.9871077066382928	1.0	500	minian
84	21	0.45902259803110423	0.9938716595482587	0.9778196905388232	0.9935276138196418	1.0	500	minian
86	132	0.1936910600189316	0.9930267083845643	0.9585690348650491	0.9931424705653731	1.0	500	minian
87	431	0.33513896385038533	0.9942676801659517	0.9779752091797607	0.9911773598846624	1.0	500	minian
88	223	2.600688265403649	0.9087299291576361	0.8733851258249608	0.8959960795484557	1.0	500	minian
89	423	0.270140224830492	0.9970749152031778	0.9603198281713903	0.9881303689411296	1.0	500	minian
90	226	0.3288488292866577	0.9925310278987183	0.9587921776286019	0.9842864236610628	1.0	500	minian
91	341	0.10450025622071057	0.997989882492398	0.9699351801841156	0.9857645514786982	1.0	500	minian
92	275	0.1473584504920448	0.9887324349455627	0.9591725006407558	0.9926227232334248	1.0	500	minian
93	392	0.4908660310139992	0.9927457234729659	0.9674625984638634	0.9852806956997513	1.0	500	minian
94	333	0.25093968639322345	0.9925460171566959	0.9129920605780458	0.9919379760336595	1.0	500	minian
96	349	0.3240154624151366	0.9937731488234867	0.9758118366457686	0.9888204887642347	1.0	500	minian
97	106	0.4935262587747997	0.9850852008200266	0.9666421156536446	0.9892167480277266	1.0	500	minian
98	410	0.09974976298426384	0.9972004273637278	0.9153785604108963	0.9890376155564339	1.0	500	minian
100	0	0.13299219645521465	0.9941914201674134	0.9571271696873537	0.9958221761421152	1.0	500	minian
101	212	0.5054253422534231	0.969781390851634	0.9729941916177587	0.9917916684095456	1.0	500	minian
102	406	0.47291373257614	0.992612800543895	0.967211065422384	0.9873974155024697	1.0	500	minian
104	377	1.1526182134127432	0.9706808317954257	0.676965973432195	0.7009867277606217	1.0	500	minian
105	63	0.1737064587245402	0.997351294355756	0.9889838066410942	0.9940630121472491	1.0	500	minian
106	385	0.08997267356420789	0.9953856385490786	0.9687457940869624	0.9866229624936662	1.0	500	minian
107	170	0.26937849054083546	0.9951237317815945	0.9647660473400964	0.9930368091163145	1.0	500	minian
108	240	0.043394820231857104	0.9938896444131623	0.9282120077160843	0.9848260339750718	1.0	500	minian
109	308	0.22814854411236246	0.9962617617352327	0.9616928041220557	0.993512623115245	1.0	500	minian
110	23	0.22509322731909162	0.9966634362184015	0.9610977297538065	0.9895189449675753	1.0	500	minian
111	292	0.07362523249215185	0.9977261953268521	0.9419613517694592	0.9891431248906167	1.0	500	minian
112	363	0.24727557264084798	0.9974750535659195	0.9727234207054934	0.9865385013870319	1.0	500	minian
113	8	0.151574614224074	0.9969922891844903	0.9393793690926389	0.9862246051914535	1.0	500	minian
114	214	0.37737628548109226	0.9912769531474058	0.9856240328377517	0.9918000178678295	1.0	500	minian
115	249	1.2579086011441054	0.9685789135279873	0.811119288890615	0.8434049635759884	1.0	500	minian
116	429	0.270158103444357	0.9932482972260882	0.9597505035475882	0.9960810856387482	1.0	500	minian
117	169	0.2808789683805956	0.9895200931714321	0.9398340200686965	0.9923097609535251	1.0	500	minian
118	401	0.702089567330322	0.987129735097178	0.9627018566305481	0.9816968525618545	1.0	500	minian
119	388	0.46389145313531066	0.9848484817660131	0.9624266003466314	0.9853709194946481	1.0	500	minian
120	296	0.36602359926630873	0.9893679014941766	0.8936278464386505	0.9777651856688618	1.0	500	minian
121	16	0.2964284160830456	0.9971461885349477	0.962167525084242	0.9882230094097263	1.0	500	minian
122	421	0.2935281073738551	0.992257958463425	0.9330552367239869	0.9889143280438294	1.0	500	minian
123	40	0.2506515625035853	0.9877956753172604	0.9779067187935121	0.9847189551578048	1.0	500	minian
124	128	0.6588171975048461	0.9902016930100084	0.9276473046502006	0.9620780789583013	1.0	500	minian
125	99	0.9267833261352886	0.9743743515116109	0.7566871525431474	0.780936832299965	1.0	500	minian
126	36	0.23468773184255307	0.9965735544116252	0.9632295840261937	0.9928346967062259	1.0	500	minian
127	203	0.3911296169862494	0.9923886769823685	0.975242769196742	0.9923622359920261	1.0	500	minian
128	309	1.334739734191717	0.9680296798249713	0.906858250589126	0.9037087010550231	1.0	500	minian
129	234	0.5620954490037323	0.9793861317033229	0.9295077090941402	0.9856887940980593	1.0	500	minian
130	45	0.4152714757996284	0.9875181689137752	0.9635460555311017	0.9863935749646188	1.0	500	minian
131	256	0.07072217373173703	0.9709627533054486	0.7373253923248593	0.7252444099172433	1.0	500	minian
132	348	1.009569634682952	0.9821320644764492	0.685344806921074	0.7373756539702275	1.0	500	minian
133	347	0.1498753637016248	0.9882728721721675	0.9655574690364135	0.9909059016003483	1.0	500	minian
134	220	0.3087081530987824	0.9883701063296613	0.9696047074188994	0.9934351228333624	1.0	500	minian
135	416	0.6288201779655287	0.979075526373909	0.8369726830097627	0.874090087786239	1.0	500	minian
136	372	1.8950737495348433	0.9298198075470001	0.6704506100570171	0.7246874974398161	1.0	500	minian
137	389	0.059187520096962015	0.9987185422571366	0.9440847570110465	0.984520901914399	1.0	500	minian
138	95	0.43192664125479857	0.9781454709333213	0.9482743403612242	0.9828332792174442	1.0	500	minian
139	229	0.4272467513714317	0.9933586172942217	0.983489660607145	0.9886000411593101	1.0	500	minian
140	94	3.3158917119614078	0.8672904419279167	0.7768773098904898	0.8252365578968347	1.0	500	minian
142	88	0.18152211095152093	0.9967048514945177	0.9847732895265469	0.9915233911248564	1.0	500	minian
143	274	0.22886066815989675	0.9930024625212652	0.9586706381782023	0.9929857637241757	1.0	500	minian
144	165	0.5665920155947619	0.9739106180562596	0.9658783475702526	0.9916323974685111	1.0	500	minian
145	303	0.5267749081772595	0.9913723759325627	0.9592217062780246	0.9810124092313627	1.0	500	minian
146	294	1.0348529957597006	0.9821565865890546	0.822798920509944	0.8567524912951879	1.0	500	minian
147	351	0.23119001594732952	0.9965287720601668	0.9621908391565162	0.9848221362875494	1.0	500	minian
148	110	0.866829865162525	0.9746126202324792	0.9382849467540963	0.9683297076707259	1.0	500	minian
150	53	0.11099946714350818	0.9971293589206116	0.963256739748468	0.9929936317436299	1.0	500	minian
151	58	0.5128724474607136	0.9894311411856952	0.9422253829436487	0.983436696128662	1.0	500	minian
152	328	2.1628986887760844	0.9327081139644263	0.8048102614885911	0.8312487319531202	1.0	500	minian
153	327	0.5551188868126363	0.9808182844990674	0.9776388936793632	0.986772663330671	1.0	500	minian
154	277	1.2253035823048275	0.9462283112139965	0.652530106259829	0.6730168571195403	1.0	500	minian
155	317	2.437070232273109	0.8893914221316038	0.6528906193816769	0.7005203079380784	1.0	500	minian
157	230	0.5928205682532599	0.9847097278051294	0.9783998215462202	0.9890399179611258	1.0	500	minian
158	83	0.11173399288170018	0.9939884794890702	0.976589523853057	0.9897963165679045	1.0	500	minian
159	39	0.14716260847752444	0.9942393687837909	0.9780628433237876	0.9898658590284062	1.0	500	minian
160	339	0.34027746763383826	0.9947636509940562	0.970359600371633	0.9900161726482138	1.0	500	minian
161	219	0.03577266683240175	0.9980503165746651	0.9905149572049855	0.992501923407886	1.0	500	minian
162	197	0.12449838834971338	0.9973421983346349	0.9740776037148986	0.9934764965303154	1.0	500	minian
163	390	0.4171912781934942	0.9923080502929047	0.9795883965410577	0.9892595055717367	1.0	500	minian
165	135	1.3061226725233817	0.9628950700763712	0.8565450421944543	0.898678561800599	1.0	500	minian
166	291	0.2578403526663489	0.996085052677097	0.9460692863426674	0.9933276167980917	1.0	500	minian
167	209	0.1393084571049293	0.9983599679457809	0.9744418178846341	0.9943599931600816	1.0	500	minian
168	202	0.10848618437824065	0.9964317579748463	0.9711849984010666	0.9959337413112537	1.0	500	minian
169	18	0.39135393144003355	0.9893909296951752	0.9767543117707206	0.9879785060112837	1.0	500	minian
171	310	3.568100061073625	0.8624221285954989	0.7479148036796084	0.7919109276909045	1.0	500	minian
172	305	0.005138987358233049	0.9937915418307006	0.9563648541408677	0.9895811608043221	1.0	500	minian
173	270	0.14695968846921412	0.9974377496261077	0.9891536808264552	0.9911006592692705	1.0	500	minian
176	1	0.3022661811686915	0.9962971513128646	0.9875885793543325	0.9935400626648713	1.0	500	minian
178	300	0.030661022391461182	0.9906900711952308	0.9602162080597377	0.9837562925249956	1.0	500	minian
179	166	0.27406496078682135	0.9962391631598913	0.9792978225382906	0.9911518518522147	1.0	500	minian
181	371	0.2582576252876418	0.9921446553261857	0.9799364260208122	0.98764507603616	1.0	500	minian
182	153	0.18209094188343083	0.9959600334143244	0.9858975665254528	0.983347696696204	1.0	500	minian
183	276	0.40870389182123534	0.9944024840540692	0.9069380909053918	0.9792369546075588	1.0	500	minian
184	90	0.23907182021086912	0.9958679773957453	0.9633829037953093	0.9914023269964175	1.0	500	minian
186	102	0.2765079078750454	0.9965978862114285	0.9894550003350662	0.9923843860825441	1.0	500	minian
187	107	0.05303599556282698	0.9976756674079074	0.9531705036129526	0.9808152297730849	1.0	500	minian
188	192	0.27170900951009225	0.9933057802915328	0.9807205225540686	0.9966594650265632	1.0	500	minian
189	13	0.3677752122426606	0.9939622091438698	0.9583657093906943	0.9904576028846166	1.0	500	minian
190	336	0.600978672273658	0.9871781729599601	0.9413906654548232	0.9913017077428105	1.0	500	minian
191	97	0.42938762277572806	0.9898080635311729	0.9758158009385666	0.9850357342396264	1.0	500	minian
192	27	0.43660197965767417	0.9903309566689275	0.9708477237525812	0.983342644880846	1.0	500	minian
193	311	0.2548502954891087	0.98745307089577	0.915068752518619	0.9668506680255954	1.0	500	minian
195	396	0.6803097737315733	0.9885329074632309	0.9420279316097169	0.9937193038756206	1.0	500	minian
196	215	0.9785219643774723	0.9649736706724621	0.7443812335146954	0.7521650724030107	1.0	500	minian
197	6	0.14844075120820188	0.9984800437322278	0.9716164228318042	0.9910326304888859	1.0	500	minian
198	93	0.06265195400860823	0.9867202031377198	0.9754919009982564	0.9914536310482487	1.0	500	minian
200	19	0.06494245379226274	0.9954843264169785	0.9824578745337336	0.9933281748975865	1.0	500	minian
201	250	0.1838184886486634	0.9942729835365015	0.9731150681959252	0.9859225540769598	1.0	500	minian
203	75	0.25011906327383543	0.9953162200323469	0.9769602437418388	0.990169949223558	1.0	500	minian
204	425	0.40859296078145163	0.9947402717364554	0.9415626451284949	0.9866275289956521	1.0	500	minian
205	241	0.35042396379948626	0.9894459221035998	0.9499839100706045	0.9878202396248259	1.0	500	minian
206	369	0.3233587341247326	0.9953170445504577	0.9779644929294323	0.9818923284727117	1.0	500	minian
207	44	0.2271929397987117	0.9942310893283532	0.9713135818796934	0.9893886420537941	1.0	500	minian
208	221	1.5104837867205148	0.9570944733283671	0.7147849387886583	0.8178612900829513	1.0	500	minian
209	329	0.4466476403679933	0.9910914137349175	0.9849795373018704	0.9921733553603883	1.0	500	minian
210	129	0.2964008859733254	0.9952736343287147	0.9649998001015718	0.9919061795211328	1.0	500	minian
211	54	0.4569652919047541	0.9901222890360973	0.9491764053590469	0.9869283757790482	1.0	500	minian
212	271	0.15281011574617218	0.9954533785201276	0.9654990436758255	0.9921703531392959	1.0	500	minian
213	409	0.34851926825871954	0.9967281996124729	0.9635358182988594	0.9913955644397227	1.0	500	minian
214	138	1.2819183567732255	0.965619938710397	0.7147602750933876	0.7538373003554841	1.0	500	minian
215	337	0.551093099794752	0.9914057472955811	0.9582867026067108	0.9862664926638732	1.0	500	minian
216	114	2.5372500465172534	0.9044835778785522	0.6685742144848963	0.682216615519201	1.0	500	minian
217	29	0.057242967750168176	0.9992935814839062	0.9476784425246566	0.9942421400455381	1.0	500	minian
218	136	0.3662915881982101	0.9907626024251073	0.9555112865882706	0.9931643738676244	1.0	500	minian
219	419	1.1275878816621154	0.9760215833265619	0.5952693451130132	0.6918293168176731	1.0	500	minian
220	42	1.8703123808868252	0.9383030165210903	0.7407265351064668	0.803141491427089	1.0	500	minian
221	127	0.319617002133666	0.994438763278331	0.9541113089040965	0.9911739854342679	1.0	500	minian
222	67	1.336852014768909	0.9607824732612983	0.7305285471606159	0.7647017419876136	1.0	500	minian
224	367	1.4974937700147346	0.9443038478658218	0.8122781750605407	0.8215828136603199	1.0	500	minian
225	279	0.1762541269532911	0.9959352856491623	0.9886270545341734	0.9871408585947667	1.0	500	minian
226	331	0.46398209372581284	0.9910567106112599	0.9647324487120814	0.9932723798310724	1.0	500	minian
227	144	1.0284099867342895	0.9784499167833342	0.928004202252016	0.9711526205737486	1.0	500	minian
228	332	0.5401609897751517	0.9864908695309557	0.9548550516160973	0.9764861455790721	1.0	500	minian
229	343	0.16368432008453504	0.9978266569538965	0.9653026000342853	0.9809782163271477	1.0	500	minian
230	391	0.11555950838398625	0.996573484112177	0.9820137558994765	0.9901493225788519	1.0	500	minian
231	48	0.28724728053080834	0.9937164669138232	0.9846297189508925	0.9936864942784579	1.0	500	minian
232	74	0.12016870666033352	0.9984985175508465	0.9311302435113572	0.9904018157837393	1.0	500	minian
233	62	0.43021806643981975	0.9925636007732576	0.9780163119356697	0.9889914568294694	1.0	500	minian
234	237	0.289240075303435	0.9915794375874734	0.9525790999945434	0.9863006318316032	1.0	500	minian
235	295	1.5741783715566067	0.9508979084083065	0.7840998708574458	0.8213071943499451	1.0	500	minian
236	224	0.8969600301910845	0.9537779103899349	0.7219077266173999	0.7373355903486541	1.0	500	minian
238	158	0.25685665459002993	0.9942677261144113	0.9490106498294822	0.9931042201485168	1.0	500	minian
239	239	0.14432312875668346	0.9968280769273097	0.9772569930898923	0.9893046740042197	1.0	500	minian
240	213	0.2967730550069169	0.9791859852414929	0.9427476071979595	0.985198996427971	1.0	500	minian
241	116	0.40576297261586824	0.988010599210306	0.9560945183954591	0.9922073389253542	1.0	500	minian
242	397	0.5317172576451699	0.9885712132594916	0.9576985871415514	0.9895214497769637	1.0	500	minian
243	120	0.3098716218361777	0.9942625377969064	0.9659180443177232	0.9924128743679692	1.0	500	minian
244	147	0.22609406095224555	0.9957573301158695	0.9697648163318298	0.9887476186703594	1.0	500	minian
245	24	0.4452123563533288	0.9859394199697418	0.9464275847174883	0.9922893033209815	1.0	500	minian
246	407	0.6816641647194661	0.9915897594455448	0.9291310082474142	0.989524962432781	1.0	500	minian
247	103	0.15719931644822682	0.9949267494629133	0.9596729652938173	0.989836972603274	1.0	500	minian
248	405	0.626524256581416	0.9912320489413848	0.951313875649174	0.9916090639851359	1.0	500	minian
249	56	0.07728756717941551	0.9972910244188768	0.9595092470731538	0.9857958642860118	1.0	500	minian
250	195	0.07155120258167705	0.9955597287047202	0.9534250207987421	0.9895388281477524	1.0	500	minian
251	334	0.1103428633638864	0.9859387701009683	0.9596931195448978	0.9890051376957472	1.0	500	minian
252	188	0.2802918282347254	0.9977084734694621	0.945833056394095	0.9907946553349779	1.0	500	minian
253	152	0.44439650194006475	0.9953992041888884	0.9709870719154251	0.9933798352457686	1.0	500	minian
254	201	1.8707212306947893	0.9352606298628046	0.6588671152814385	0.6533300213659644	1.0	500	minian
255	89	1.2299175945676615	0.9670407881018878	0.5792974112556974	0.5618763104681672	1.0	500	minian
256	340	0.41140808313277677	0.9965874126436302	0.9425510676681604	0.9855449940656873	1.0	500	minian
257	354	0.26767242723991613	0.9945055669673218	0.955384547668972	0.9912327516401609	1.0	500	minian
258	126	0.08814492417998032	0.9983614859223255	0.9300792007915961	0.9950634301956867	1.0	500	minian
259	216	0.226944274483444	0.9967976879536283	0.974724492909232	0.9885457128992517	1.0	500	minian
260	346	0.13381471543615728	0.997444028346625	0.956969966970569	0.9924864087553761	1.0	500	minian
261	342	0.5817052972493035	0.9918572821426391	0.9754227753786363	0.9865109179894094	1.0	500	minian
262	319	0.5192218493472267	0.990375812213599	0.9839840928319971	0.990530836253391	1.0	500	minian
263	32	0.04834468453774952	0.9962378100283779	0.9660333010348116	0.9911422462760944	1.0	500	minian
264	10	0.2705739022500526	0.9968705317653299	0.9628136904773176	0.9916099615208828	1.0	500	minian
265	73	0.11924852567401635	0.9948616739632011	0.9737614068048577	0.9828457979024607	1.0	500	minian
266	70	1.3846220731632997	0.9674439019369031	0.7419819559769479	0.7802962636270657	1.0	500	minian
267	85	0.3484820172955824	0.9933835041568613	0.9675763670113644	0.9933993208672558	1.0	500	minian
268	335	0.21287720021295675	0.995121938654681	0.9723303728272921	0.9907269577814155	1.0	500	minian
269	142	0.4442199930410977	0.9911132208528846	0.9428069624382478	0.9820620054816304	1.0	500	minian
271	164	2.2051795466890782	0.8915019436251955	0.8934193478075034	0.9506531064869823	1.0	500	minian
272	204	1.907736039597084	0.9370494903898532	0.6799428704379631	0.7471451547214365	1.0	500	minian
274	181	0.04300802666414453	0.9978488272724078	0.9597266119609018	0.9824456178434464	1.0	500	minian
275	112	0.4892982872732921	0.9913021662903002	0.9725725046014877	0.9905419156013953	1.0	500	minian
276	68	0.12230554972486499	0.9939544299103081	0.9648607208111019	0.9910771779255095	1.0	500	minian
277	424	0.5825436417836515	0.98896416404317	0.9628074340198948	0.9869892034113347	1.0	500	minian
278	11	0.3067987204258262	0.9942487078431064	0.9291105909690843	0.9834893285930721	1.0	500	minian
279	57	0.16745839596382706	0.9984825921934208	0.9774818123603193	0.9923883430327387	1.0	500	minian
280	356	0.14190015101251993	0.9903075439415998	0.9721934289777301	0.9895206663776138	1.0	500	minian
281	4	0.39368182139897184	0.9821557227968978	0.9830926317498891	0.9909568297617184	1.0	500	minian
282	98	0.27775209527111283	0.9849614895333412	0.9598718639574043	0.9878825010081306	1.0	500	minian
283	236	0.12395517733579495	0.9969372052053044	0.9168666657132442	0.9904619250222806	1.0	500	minian
284	187	0.03277521121265195	0.9877081707641566	0.9703001568208989	0.9931041949493218	1.0	500	minian
285	96	0.5101146359880045	0.9926773379241828	0.9254307960242646	0.987920508256914	1.0	500	minian
286	182	0.7144449053056866	0.9887684156898927	0.9174962015557954	0.9692337694607682	1.0	500	minian
287	108	0.6200305172901296	0.9910509073453571	0.9651732492480795	0.9908344861638949	1.0	500	minian
288	384	1.0070350248963384	0.9769459959067275	0.5527031786223056	0.5413357351258435	1.0	500	minian
289	151	0.27422817220146367	0.9889121711733402	0.9798900330926663	0.990234456490451	1.0	500	minian
290	285	0.5427623581040245	0.9821715886749939	0.8688382255993062	0.9685416821114426	1.0	500	minian
291	190	0.30597249553217964	0.9975101194355913	0.9782121246250627	0.9909817595088802	1.0	500	minian
292	350	1.314156629815366	0.9659447610614401	0.7693934937234216	0.8789621361699878	1.0	500	minian
293	387	0.0875228653902553	0.994566876854486	0.9679851540858413	0.989522948887138	1.0	500	minian
294	326	0.12337409841154427	0.9916302089052474	0.9533724294267129	0.9930491735913582	1.0	500	minian
295	288	0.37613230086175625	0.9930588637526777	0.9464466991287414	0.9890949932782493	1.0	500	minian
296	41	0.1793359719766143	0.9979936343022763	0.9721730464023238	0.9918915021166352	1.0	500	minian
297	280	3.3994768722715745	0.8800290796724186	0.773702735945027	0.7962871743065061	1.0	500	minian
299	386	0.10871203489778433	0.9890916953289878	0.8969054551620012	0.9869458185329626	1.0	500	minian
300	272	0.17551871971816146	0.9958941769364998	0.9774080497583995	0.9926345209688155	1.0	500	minian
302	400	0.03310690972047338	0.9957073452977863	0.9577742813377584	0.9882697553982468	1.0	500	minian
303	315	0.09283797595882838	0.9939133209083664	0.9464483756678226	0.9877687543827692	1.0	500	minian
304	79	0.4192315650867041	0.9898411814216239	0.9619569506309757	0.9896740217206862	1.0	500	minian
305	61	0.3652633219590665	0.9946067028739074	0.9650430444082937	0.9926997631917812	1.0	500	minian
306	199	0.3059282315671359	0.9908897264770644	0.9627309248900092	0.9892102167521509	1.0	500	minian
307	84	0.9106529148199191	0.9917244608197459	0.9473565527295269	0.9885526047213787	1.0	500	minian
308	51	0.10648334630703715	0.9977479200251549	0.9656246943254688	0.993230899596115	1.0	500	minian
309	422	0.31545958424749254	0.9965354602854131	0.9865924116479854	0.994541269460978	1.0	500	minian
310	185	0.37682771192620595	0.9935238094114032	0.9033915506007725	0.9816120130203098	1.0	500	minian
312	247	0.4600425827316812	0.9920194699708232	0.9670733221694605	0.983415557305992	1.0	500	minian
313	299	0.00209211764225454	0.9950650597160153	0.9058581897281333	0.9592570257317548	1.0	500	minian
314	362	0.10873735141512145	0.9958483987593978	0.9732218346354534	0.9857409896208297	1.0	500	minian
315	20	0.21842826044134203	0.984150923487138	0.9653969401871033	0.9920249921019648	1.0	500	minian
316	69	1.6234609841180254	0.9368544568412025	0.7838872403949498	0.7849960739228008	1.0	500	minian
317	5	0.3702553643262567	0.9930053308875245	0.9728160096513798	0.9880173503887543	1.0	500	minian
318	218	0.20131377179950172	0.9951288954639913	0.9638998942436766	0.9932795833950134	1.0	500	minian
319	34	0.5372720028878509	0.9869291060926351	0.948453400567958	0.993999038949784	1.0	500	minian
320	398	0.3423938668219162	0.99723298054314	0.9432577408211911	0.9907082579625265	1.0	500	minian
321	361	0.1741726671337343	0.996728075716669	0.9807867330486253	0.9886674176283633	1.0	500	minian
322	50	0.24368693021468094	0.9969293261150988	0.9264356728737644	0.9899626167627895	1.0	500	minian
323	191	0.19951735780975302	0.9978213940155145	0.9624506290733605	0.9899009301093975	1.0	500	minian
324	49	0.41757116922343607	0.9857866919472957	0.9680171907906103	0.985349563563795	1.0	500	minian
326	253	1.562231679180252	0.9582736193344066	0.7165417029223226	0.7550351646703557	1.0	500	minian
327	26	0.31326410059440574	0.9921067654008316	0.9627004288858259	0.979895850456882	1.0	500	minian
329	111	0.8965780770742774	0.9687815518295445	0.9342325974824941	0.9684398788126468	1.0	500	minian
330	254	0.5167947474369562	0.9866900002578441	0.9572317892842247	0.9874097793687869	1.0	500	minian
331	184	2.3299995657869808	0.8749904514717061	0.6061745658467654	0.6401379512445292	1.0	500	minian
332	378	0.5302132307919695	0.9908531410354718	0.9606519286291398	0.9729975390238449	1.0	500	minian
333	78	0.18089729622392173	0.9950618810822944	0.9778540522583563	0.9888000419980147	1.0	500	minian
334	206	0.33685839061775735	0.9887033330091634	0.9334668359434921	0.9840625012382587	1.0	500	minian
336	359	0.47410804034547904	0.9907531464549042	0.975379537281927	0.987588120627682	1.0	500	minian
337	403	0.6067753260938785	0.9822237499644477	0.9493302221530003	0.9893960167561014	1.0	500	minian
339	174	0.5589558265328488	0.9749219264893068	0.8897664235249955	0.9298097958575301	1.0	500	minian
340	33	0.2354001529657412	0.9965132882181458	0.9747742886529336	0.9873269804891344	1.0	500	minian
342	264	0.30186322649740477	0.9960296772806821	0.9605885414778887	0.9892847427635468	1.0	500	minian
343	46	1.1952086412254337	0.9535614308472354	0.8897045097682393	0.9555186857812754	1.0	500	minian
344	72	0.3122980920589935	0.9969561800366452	0.9738541398221557	0.9927838460554075	1.0	500	minian
346	194	0.1023446546616803	0.9984346645286557	0.9681811503520859	0.9937558105250281	1.0	500	minian
347	196	0.30531170160362076	0.9929176978923377	0.9785837483690296	0.9890776221661164	1.0	500	minian
349	168	0.14418874376855784	0.9988271339169795	0.9763175749635344	0.9916398449701139	1.0	500	minian
350	358	0.1964745572515645	0.9946781941515527	0.9477443869456011	0.9904879189753889	1.0	500	minian
351	322	0.2154582525178157	0.9940155907094229	0.956283288223645	0.9851202025293762	1.0	500	minian
352	293	0.4437332732872592	0.9888172509053055	0.9498906352376502	0.984910262384843	1.0	500	minian
353	324	0.9967827215354346	0.964650396991287	0.7024416243358961	0.7672445192802763	1.0	500	minian
354	210	0.2232952779919702	0.9909487096811902	0.9436762038511158	0.9894584184469886	1.0	500	minian
355	175	0.1899968471354579	0.9861312290201921	0.9141115581699393	0.984033217689023	1.0	500	minian
357	117	1.5407099688126888	0.9534959285235355	0.6024639452686835	0.7470349625219295	1.0	500	minian
358	345	0.6450142785031392	0.9804047259770529	0.7657161448588268	0.7786097478841856	1.0	500	minian
359	428	0.790585524018619	0.9722773360544386	0.9698377502605676	0.9812145092388972	1.0	500	minian
360	211	0.12771729998757742	0.9885435979472206	0.9534516788556532	0.9701884932768138	1.0	500	minian
361	284	1.5719585091910928	0.9587252269424222	0.7424407167798031	0.8218627480219096	1.0	500	minian
362	246	0.09200598034268381	0.9963698632545069	0.9864574307316297	0.9924208991347999	1.0	500	minian
364	381	0.14686758122167692	0.997962898778527	0.9715037263405912	0.9918238396442676	1.0	500	minian
367	426	0.4802008848532551	0.9919287987794546	0.8854603225732083	0.97268278206189	1.0	500	minian
370	302	0.3338173805588129	0.9948231535643715	0.9292176097503655	0.9768396999632586	1.0	500	minian
371	402	0.2511517348757384	0.9856457877531006	0.9630402537374764	0.990119039216884	1.0	500	minian
372	417	2.5757685267625514	0.8931989155999667	0.6360367463745994	0.7271586727982179	1.0	500	minian
373	60	0.24987391383948582	0.9975713207323142	0.9631146131368913	0.990524138271812	1.0	500	minian
374	368	0.28112212206363096	0.98906405962174	0.96922345473784	0.9939893120192081	1.0	500	minian
375	160	0.3990508373472429	0.9944881269269354	0.9729052391931167	0.9863685804235478	1.0	500	minian
376	171	0.11821971919052048	0.9979546639668779	0.9581920001547718	0.9920663712847572	1.0	500	minian
377	167	0.16625331630695356	0.9960231416798868	0.9786591259923786	0.992292791376962	1.0	500	minian
378	373	0.9706122259068097	0.9823503451287235	0.8869659472919457	0.9678024693698335	1.0	500	minian
379	76	0.23367354972050805	0.9926967363197006	0.9042490199250947	0.9074807783295537	1.0	500	minian
381	159	0.5886491496872941	0.9871605234955091	0.9085396619065688	0.922067356077061	1.0	500	minian
382	370	0.07166106816341884	0.9991093081748001	0.9436304443390807	0.9894953466263149	1.0	500	minian
383	266	0.28734271502594627	0.9860553514259174	0.9336292239627805	0.9542641849529622	1.0	500	minian
385	17	0.13672007164563288	0.9963514037336716	0.9727830591543019	0.9908076446853677	1.0	500	minian
386	125	0.3770889027315792	0.9877140387622357	0.9704678312542746	0.9911518035040711	1.0	500	minian
387	258	0.7601460092122716	0.9790891916541098	0.9661281025855828	0.9849819530246904	1.0	500	minian
388	313	0.19404117373541527	0.9916947349474097	0.9136257116945457	0.9882224992208889	1.0	500	minian
389	290	1.5052270215262515	0.9533200683314496	0.7469986952423443	0.7727252520580024	1.0	500	minian
390	273	0.10338943986915852	0.9947281462456984	0.9799939787485696	0.9906546615929746	1.0	500	minian
391	306	0.08228608392483994	0.9852527978670256	0.9531932386770288	0.9862259607533035	1.0	500	minian
392	383	0.3638246148994294	0.9937819340424925	0.8884622282754305	0.980458201975809	1.0	500	minian
393	105	0.1532722922431658	0.9955419523653259	0.9705484106048915	0.992939769831133	1.0	500	minian
394	222	0.21956805016977357	0.9917585824992786	0.9536029427285336	0.9876129153417313	1.0	500	minian
395	163	0.37989404866406484	0.9860907123523427	0.9736470535647477	0.9919248580080349	1.0	500	minian
397	238	1.3120196873716985	0.9697246874026143	0.8470282727596143	0.9003372480550718	1.0	500	minian
398	318	0.8338418280663901	0.9786814678463789	0.9364050798736818	0.9787060835754606	1.0	500	minian
399	399	0.30028389029201386	0.9909025329983857	0.9745468613579765	0.9914973936860894	1.0	500	minian
400	64	0.09988482451098092	0.9966881317859031	0.9780784037332027	0.9949534257900856	1.0	500	minian
401	9	0.05552152130899549	0.9911703273823638	0.973533255505326	0.9932213011520393	1.0	500	minian
402	248	2.444757700300244	0.9005828361537702	0.659824295252776	0.6378374926923802	1.0	500	minian
403	118	0.4663270642012287	0.9895258031868319	0.9584589595991851	0.9904808968832762	1.0	500	minian
405	30	0.3502441837692208	0.9921538926679595	0.9509182695240982	0.9871839752248786	1.0	500	minian
406	374	2.0738154405049003	0.9084097150981054	0.6673171706458949	0.7826936201646791	1.0	500	minian
407	146	0.5560681662915715	0.9858191134590337	0.9441108655732501	0.9876304181687692	1.0	500	minian
408	360	0.088241966951665	0.9983571201149483	0.9274331888509009	0.9954222238299189	1.0	500	minian
409	55	0.13127414941364096	0.9949728302401587	0.9745168884534126	0.9921886960695283	1.0	500	minian
411	380	0.09180276231309378	0.9974748610745714	0.9791011181328816	0.9954133631786785	1.0	500	minian
412	282	0.5575761123342353	0.9838228129232122	0.9585206837426492	0.9908587062943128	1.0	500	minian
414	262	1.8512591751944831	0.9571071891653072	0.6819110112639197	0.6581015687184695	1.0	500	minian
415	121	5.0252597821945475	0.8452954738231693	0.7830046175222787	0.8827049314632196	1.0	500	minian
416	101	0.48346053397958105	0.9914152983742384	0.9763249281525997	0.9928249379752973	1.0	500	minian
417	413	0.6651936544602596	0.984147859355018	0.95812128870321	0.9800442485592034	1.0	500	minian
418	77	0.24739811803843995	0.991891088141314	0.9851249547551447	0.9910459765680167	1.0	500	minian
420	43	0.16263195447883427	0.9967326854684891	0.9335803468071886	0.9915508601686127	1.0	500	minian
421	338	0.18140774390148892	0.9978547225510571	0.9810650675432095	0.9912097906430788	1.0	500	minian
423	286	0.12256973753085487	0.9891201194771134	0.9566155432705553	0.9895198278123513	1.0	500	minian
424	260	0.12451781667823966	0.9971441400997363	0.9892905109332538	0.9914071356295684	1.0	500	minian
426	156	0.48759616016511026	0.9851214831209143	0.948517408937963	0.9870193288550576	1.0	500	minian
427	157	0.4327617771388937	0.9846964421968184	0.8738214900637553	0.8894115620785746	1.0	500	minian
429	245	0.08056540107392711	0.9986316988067305	0.9529305104038289	0.9901995031527184	1.0	500	minian
430	124	0.23828785471782168	0.9968257957105832	0.9530106725740716	0.9873427339761678	1.0	500	minian
431	393	0.3779579880753178	0.9944674778434349	0.9499957787242324	0.9882009279104755	1.0	500	minian
432	2	0.3192140716793477	0.983961473785524	0.9265426558073991	0.9944169682585604	1.0	500	minian
433	314	0.33410970879764	0.994634369610566	0.9575206064409357	0.9906587984757815	1.0	500	minian
434	352	0.14635182799698992	0.997910934969643	0.9668314425798513	0.9938805706882206	1.0	500	minian
435	177	0.05743800532427106	0.993243285346385	0.9589151054079342	0.9945558941219083	1.0	500	minian
437	47	0.915619147045007	0.9711208997476306	0.9771042276554093	0.9925182492717453	1.0	500	minian
438	81	0.15639189739444154	0.9985974100229901	0.9679182287833633	0.9927762369393471	1.0	500	minian
439	87	0.16194902178142234	0.9949019946467462	0.9800429971410114	0.9938441237663564	1.0	500	minian
440	375	0.33048946031555515	0.9899973746401387	0.9249195574815036	0.9891332888247654	1.0	500	minian
441	71	0.3363656609629809	0.9940608721001751	0.9767338034061063	0.9919191629521982	1.0	500	minian
442	14	0.23983839839393492	0.9955476858232974	0.9766565352818223	0.9923545291355564	1.0	500	minian
443	31	0.30045015805787756	0.9879478525888504	0.9633146694951411	0.9854770317434751	1.0	500	minian
444	162	0.2597405815047015	0.9943614650828361	0.9747821155534555	0.9901539800019966	1.0	500	minian
446	140	0.08267758410072613	0.994940016607296	0.9646179945792805	0.9860395255273618	1.0	500	minian
447	208	0.20700723970453197	0.9961301252256033	0.9014978172543269	0.9889254238760379	1.0	500	minian
448	353	0.3202395022074708	0.9923826281774236	0.9723907537201913	0.988330846396867	1.0	500	minian
449	66	0.2120627146470033	0.9982483202401704	0.9741043417683918	0.9926116802421321	1.0	500	minian
450	278	0.20929211009042786	0.9977912669226755	0.9577063433401317	0.9925316293239036	1.0	500	minian
451	133	0.1306575907133152	0.9967652134829382	0.9630896647417454	0.9837290338495595	1.0	500	minian
452	263	2.2168223534426077	0.9311736008569172	0.6413626341831073	0.7421932804815443	1.0	500	minian
453	394	0.5197051158224961	0.9925951858104431	0.982437296497707	0.986259144086601	1.0	500	minian
454	228	0.02229139444881663	0.9985331395789993	0.9708429713776535	0.9922613450858664	1.0	500	minian
455	189	1.8165647617455398	0.8805928661541003	0.4242391323300479	0.4531276495139406	1.0	500	minian
456	366	1.085259257182772	0.9805020954632112	0.5943509868024721	0.5905199101095222	1.0	500	minian
459	404	0.29059516136872093	0.9946802257179117	0.9659632352644764	0.995671882062551	1.0	500	minian
460	122	0.22529652518173313	0.9979806681620924	0.9783878490893857	0.9961922939740083	1.0	500	minian
461	364	0.09686631918629346	0.9974998574756125	0.9666217341800813	0.9904938922155004	1.0	500	minian
463	233	0.17650323701741877	0.9872164936579094	0.9646037934334702	0.986133225511389	1.0	500	minian
465	357	1.9910463885903509	0.9332000708472322	0.726294496379498	0.7332603937093441	1.0	500	minian
466	113	0.26414269157844034	0.991632914740906	0.974272917406073	0.9940990590353868	1.0	500	minian
467	25	0.09333345236890603	0.99664489955518	0.9593702286686985	0.9880917984510366	1.0	500	minian
468	379	0.01656871335954596	0.998109460832878	0.9695306122775478	0.9909047464360292	1.0	500	minian
469	137	1.9872984751639668	0.924818630026211	0.7251691938178269	0.7693340644248707	1.0	500	minian
470	235	0.39257047292536457	0.9943147873862319	0.9676033553843586	0.9855446949994857	1.0	500	minian
471	251	0.9190525904391322	0.9628645233310327	0.9645692254611348	0.9744980647197059	1.0	500	minian
472	86	0.5058442649838473	0.986896412345686	0.9808056930959134	0.9865914121872268	1.0	500	minian
473	242	0.04473437762023196	0.9909253758467718	0.9552681817825227	0.9933308837176399	1.0	500	minian
475	148	0.249966523668655	0.9915633139177497	0.9493140418986771	0.9891849504224317	1.0	500	minian
476	316	1.0403277397882458	0.9715473051092594	0.9324900875857169	0.977511316926657	1.0	500	minian
477	217	0.37688350844415763	0.9928254530812382	0.9008853684652395	0.9873480162556552	1.0	500	minian
478	178	1.6204290412846263	0.945729815978542	0.7004728820442302	0.7248014396775341	1.0	500	minian
480	412	0.43884439057110586	0.9918421218657048	0.9422225357023273	0.9907567421432433	1.0	500	minian
481	183	0.20680411184527148	0.9921634233201573	0.9762447223951916	0.9893535014291786	1.0	500	minian
482	186	0.29613519779567876	0.996981565231315	0.96625889223838	0.9846476901440043	1.0	500	minian
483	268	0.47644035493244935	0.994071591484732	0.9704918421956589	0.9866577509934888	1.0	500	minian
486	52	0.0966484346185943	0.9962119493851735	0.9591664147490256	0.9822137391834486	1.0	500	minian
487	261	0.35311785773962445	0.9934119252070116	0.9151303275886216	0.9817430441171168	1.0	500	minian
488	179	0.13038373991036054	0.9883536819637158	0.9818485658987256	0.9903042759302818	1.0	500	minian
489	231	0.21980051074337834	0.9975819150742972	0.9851765085833636	0.9894728439742978	1.0	500	minian
490	80	0.3491017320034829	0.9922917719728223	0.9766243569573314	0.9904628851495215	1.0	500	minian
491	420	0.1682798309021172	0.9963362053037209	0.947476005252905	0.9846482937429335	1.0	500	minian
492	82	0.2596027533072344	0.9954069643034392	0.9554278422895747	0.9912376454471946	1.0	500	minian
493	312	0.7797771493719314	0.9847666677987938	0.9151118624482518	0.9606938280390493	1.0	500	minian
494	104	0.25284694327529433	0.99643871434279	0.9590143284988131	0.9923085990785997	1.0	500	minian
495	414	0.6078180777450334	0.9692989068427246	0.9585774689112856	0.9864195754447536	1.0	500	minian
496	255	1.3646041580439137	0.9264149010025563	0.7591501154438405	0.8194215446270419	1.0	500	minian
498	382	0.3747580860926447	0.9916520176830561	0.9544828421597327	0.9837554085983149	1.0	500	minian
499	232	0.11699047196596093	0.998199025034704	0.9370416194330374	0.993511299427325	1.0	500	minian
0	20	2.770840145382829	0.7919961697880744	0.5404285252877575	0.5438657371676351	1.4	100	minian
1	93	0.19536935841240116	0.9981997331457357	0.9819016016335501	0.9946787553526276	1.4	100	minian
2	19	0.7333306983380745	0.9839760230577201	0.9404774661307305	0.9551170344339325	1.4	100	minian
3	53	0.2027011914755711	0.997323140579057	0.9691071946151238	0.9962476832932698	1.4	100	minian
4	56	0.12347842528864603	0.9988210704284844	0.981155112464927	0.9963880934439133	1.4	100	minian
5	21	0.10237646229017504	0.9992455523220314	0.9880781451425686	0.9953600166849317	1.4	100	minian
6	51	0.24793037783800753	0.9891480919897735	0.9891712958460466	0.9969487213986354	1.4	100	minian
7	31	0.1308344457048053	0.9941177160361071	0.9859064550787756	0.99342097094582	1.4	100	minian
8	39	0.08421419992528198	0.9972675693204303	0.9853349514931521	0.9965700181190441	1.4	100	minian
9	78	3.048049395193882	0.8764246239658802	0.6656309151263764	0.676270535146918	1.4	100	minian
10	75	0.18327659309715705	0.9952069941337396	0.9750783809254313	0.9928859561765029	1.4	100	minian
11	1	0.15468683384100163	0.9992762843447883	0.9862266896304859	0.9948881774525494	1.4	100	minian
12	11	0.3504728357873681	0.9946998881606779	0.9897350486004415	0.9939076660714314	1.4	100	minian
13	49	0.26654587478335995	0.9942024171114698	0.9924330957071026	0.9965779243670608	1.4	100	minian
14	72	0.3922937757796229	0.990362961176671	0.9872862690050723	0.9918145325538488	1.4	100	minian
15	94	0.33741429643612825	0.9956104797560279	0.9805148395409004	0.994159228221636	1.4	100	minian
16	12	0.24417938515644294	0.9964603653557761	0.9859779898525021	0.9965864001948109	1.4	100	minian
17	40	0.17422900115119025	0.9946157920795854	0.9847101643354249	0.9971891068745813	1.4	100	minian
18	46	0.17960884344610795	0.9933866389149959	0.9867775446323317	0.9956527133484542	1.4	100	minian
19	76	0.40144078555663243	0.9967211664594465	0.9742966873120116	0.9949975617395957	1.4	100	minian
20	44	0.22166270428486312	0.9970004938403264	0.9747233906441412	0.9941321393202942	1.4	100	minian
21	29	0.037251434900531046	0.9889569959912782	0.9887834658267941	0.9974920905239931	1.4	100	minian
22	80	0.16231704141168207	0.9961787343728284	0.9799187431384931	0.9934305142041258	1.4	100	minian
23	48	0.15579354567661352	0.9939788469565483	0.9845786032759491	0.9966246901620065	1.4	100	minian
24	27	0.1922478906347967	0.9972322277853432	0.9776429670147121	0.9942219257950096	1.4	100	minian
25	35	0.17382488160935614	0.9949221402909851	0.9806656563350815	0.9957518632749962	1.4	100	minian
26	23	0.14568163116179703	0.9983169682789921	0.9928966359277706	0.9946098238016705	1.4	100	minian
27	67	0.09826166777001241	0.9976038802218681	0.9894779419876124	0.9944036702682779	1.4	100	minian
28	5	0.3376458337977513	0.99681471839187	0.9920349580312585	0.9940762513612426	1.4	100	minian
29	0	0.3610698743699323	0.9951287248279787	0.9744852017697143	0.9951035629337196	1.4	100	minian
30	86	0.146741019268394	0.9983911607786592	0.9422026551292553	0.9945157405028453	1.4	100	minian
31	52	0.945790230954097	0.9752260809251451	0.7340273547321237	0.6894321521643222	1.4	100	minian
32	15	3.2520915305430114	0.8719655976892733	0.7839279535655383	0.8102064345475898	1.4	100	minian
33	16	0.18022469358717277	0.997423226893468	0.9898283646986376	0.9968570010910456	1.4	100	minian
34	38	0.031742435722102454	0.9971203371552491	0.9869492845735581	0.9941055685223981	1.4	100	minian
35	7	0.10667093875562902	0.9934904297156466	0.986048515417793	0.9962487578649366	1.4	100	minian
36	83	0.39189624667224093	0.9946029403428726	0.9733035548449285	0.9896883640888973	1.4	100	minian
37	73	0.19585801969290104	0.9962437908767079	0.9814516785611693	0.9923138043218369	1.4	100	minian
38	95	0.09373705695611152	0.9823928028582763	0.977819145441129	0.9964375524751001	1.4	100	minian
39	34	0.20302215370231866	0.9878760379276728	0.9732890218537592	0.9954343035340196	1.4	100	minian
40	33	0.04660441452855971	0.9909984034482263	0.9862596162290667	0.9962650509971893	1.4	100	minian
41	37	0.0587469151648119	0.9871443846331879	0.9916804478379304	0.9972120665170126	1.4	100	minian
42	41	0.16070104435470636	0.9968194302835446	0.9915741144782565	0.9965772858578419	1.4	100	minian
43	81	0.4059522915994404	0.9948801875670834	0.9748869408072758	0.9923898377258923	1.4	100	minian
44	25	0.19776204207882975	0.9933621745573931	0.9921051210321862	0.9974432344914523	1.4	100	minian
45	64	0.2730310958039825	0.9946839772844754	0.9834207381116351	0.9954434245647202	1.4	100	minian
46	47	0.13808119602857405	0.9971256266019384	0.9845405544648064	0.9966065302344755	1.4	100	minian
47	79	0.1960089693554908	0.9978702546827334	0.832741711472548	0.9944070189741596	1.4	100	minian
48	57	0.21980416803389732	0.9979967816582963	0.9839300229463254	0.9959973432378373	1.4	100	minian
49	26	0.10325278448865113	0.9949715756829769	0.9818562753233381	0.9948855316586057	1.4	100	minian
50	14	0.2880624955680523	0.9967839609202261	0.9820153330531918	0.996451055609823	1.4	100	minian
52	30	0.14854861045343848	0.9972242538575109	0.9843303855837489	0.9932118276050991	1.4	100	minian
53	74	0.3079578181418652	0.9943101414448117	0.9645229066366676	0.9904073205512496	1.4	100	minian
54	28	0.20093678300364257	0.9887208929036833	0.9931435581436611	0.9975879168800594	1.4	100	minian
55	9	0.16262697807506943	0.9964463444487223	0.988197616700642	0.9908167233702696	1.4	100	minian
56	13	0.5641778743854954	0.9902300304616906	0.9806747502746196	0.9940000242257061	1.4	100	minian
57	68	0.4103145665370593	0.9941173881207424	0.9797518879620035	0.9889588919434329	1.4	100	minian
59	32	0.08073614881363275	0.9969780960880198	0.9917828919591734	0.9943946333294835	1.4	100	minian
60	6	0.10438197437307345	0.995888186204735	0.9868425817211582	0.9971850270133013	1.4	100	minian
61	50	0.31444064221211104	0.9949915524125287	0.9883063031259718	0.9901168552184642	1.4	100	minian
62	77	0.27509383856046643	0.9923906660177056	0.976692810392927	0.9940365091513169	1.4	100	minian
63	89	0.04104611085067526	0.9939267159529479	0.9902185221530372	0.9904055700809794	1.4	100	minian
64	17	0.2298513313868267	0.9948886425889739	0.966530571215532	0.9930109502857278	1.4	100	minian
65	36	0.16452521479551213	0.9941541945792907	0.9863807550478813	0.9939985114004944	1.4	100	minian
66	22	0.17757095653873373	0.9937121658313663	0.9894533098384484	0.9965712858550134	1.4	100	minian
67	84	0.19205471555858733	0.9914182933581135	0.9753944370162133	0.9965673329093188	1.4	100	minian
68	18	0.2882335445834194	0.9960437450048337	0.9865814992149363	0.994329585066137	1.4	100	minian
69	55	0.09696241595571567	0.9980200795874488	0.9607800262114806	0.995028529962163	1.4	100	minian
70	85	0.3296954202565228	0.9951575046361217	0.9431990749520136	0.9942204691457402	1.4	100	minian
72	62	0.12988184288126178	0.9972690388163115	0.9715837658213669	0.9952064981311864	1.4	100	minian
73	90	0.45241715168339464	0.9897997446115897	0.9852039441327813	0.9949828301370115	1.4	100	minian
74	91	0.1956297527056567	0.9972055656003987	0.9601801000201982	0.9933970670664648	1.4	100	minian
75	82	0.1604128453332841	0.9975091229617906	0.9776161870090629	0.9937746812857019	1.4	100	minian
76	60	0.1539210122117185	0.9962332314245922	0.9772772456999576	0.9942953945824126	1.4	100	minian
77	61	0.3390654642724675	0.9928876076238466	0.9818375955433816	0.9943937478752318	1.4	100	minian
78	8	0.338253641578738	0.9951574463386356	0.9896235369598316	0.9940802647952001	1.4	100	minian
79	24	0.08475234038359435	0.9979764110917794	0.9777371995196535	0.9959397086441858	1.4	100	minian
80	63	0.523672531793476	0.9868320939227107	0.9710873025594744	0.9935739190368559	1.4	100	minian
81	42	0.2860004410227486	0.993678300457268	0.9772241528545959	0.9962037292737952	1.4	100	minian
82	87	0.4030921532105278	0.9928336274534487	0.8892908539445613	0.9916936028069412	1.4	100	minian
83	59	0.16363294065874986	0.9972758435866804	0.9815589326314924	0.9956164443291556	1.4	100	minian
84	54	0.2819064618628403	0.9958767105784146	0.9882432348532564	0.9965002036855392	1.4	100	minian
85	66	0.3380863312700181	0.9972322389063701	0.9794070904074687	0.9941077651963888	1.4	100	minian
86	58	0.2502532699649327	0.9967616387467116	0.9882580380297709	0.9941293616481516	1.4	100	minian
87	65	0.10962145633606867	0.9933497036695909	0.969273094000914	0.9952233927397343	1.4	100	minian
88	45	0.08304418279257189	0.9983076689076178	0.9898458281498291	0.9970470962829382	1.4	100	minian
89	70	0.21730135927945668	0.9951257969152462	0.9589295032228725	0.9938368729052574	1.4	100	minian
90	88	0.17948461092486112	0.9965750040488834	0.9871529053814203	0.9910518227883658	1.4	100	minian
91	92	0.1094795678265166	0.9977698390737394	0.8565467385165823	0.9965400352504358	1.4	100	minian
92	3	0.33019728505121576	0.994107750154146	0.9860302422855545	0.9927333401658451	1.4	100	minian
93	43	0.1330539378176688	0.996294821070837	0.9795465955286538	0.996438941013977	1.4	100	minian
94	4	0.2960867325260528	0.9902596441711203	0.7978843275841981	0.9900248853254736	1.4	100	minian
95	71	0.16759594317503176	0.9969573883692778	0.9894897246284309	0.9955487384081395	1.4	100	minian
97	69	0.4554228770292362	0.9931333373848659	0.9871271726153832	0.9943090662503514	1.4	100	minian
98	10	0.26357398634877055	0.9928632290542987	0.9866214763561703	0.9902333383051144	1.4	100	minian
99	2	0.3629055796518527	0.9920413928830513	0.9737669871091664	0.9930809754289672	1.4	100	minian
0	173	0.16511814133894973	0.9950368601268047	0.9763245972401324	0.9941917111071419	1.4	300	minian
1	230	0.04591096246815604	0.9956086481064351	0.9917860377866413	0.9938869828190718	1.4	300	minian
2	189	0.036645382071411	0.9969017304065052	0.9812425264839864	0.9924189711776603	1.4	300	minian
3	255	0.395496529101609	0.9941505642528937	0.97970840296592	0.9931442190573808	1.4	300	minian
4	105	0.2567466338188945	0.9850809417418851	0.9917012069741887	0.9937430636199567	1.4	300	minian
5	110	0.09240284402808478	0.998112138472238	0.9887544961325614	0.9947414016232067	1.4	300	minian
6	201	1.726634061757141	0.9341412551837796	0.7045201294130342	0.6731950925753294	1.4	300	minian
7	77	0.36195642967177344	0.9921783332571106	0.9744170425253106	0.9901964488085658	1.4	300	minian
8	165	1.3940923008185202	0.9637500739788476	0.704969886105584	0.7341797884573299	1.4	300	minian
9	148	0.11756761274368056	0.9963677806290184	0.9857969760420975	0.9940704105530404	1.4	300	minian
10	119	0.040930924813139626	0.9974887228623572	0.9756388861888071	0.9940757448443696	1.4	300	minian
11	2	0.5587604964539129	0.9862597780403406	0.8569963837437006	0.9889702671752288	1.4	300	minian
12	91	0.26766282014776793	0.9961619119876851	0.9877727119893691	0.9973448859798347	1.4	300	minian
13	166	0.43270133084043805	0.9889110390005911	0.9838589639702047	0.9959540052240129	1.4	300	minian
14	200	0.12893515717578713	0.990512948282307	0.9867812070091107	0.9960735299870583	1.4	300	minian
15	140	0.144626373843537	0.9987686585967721	0.9903563467732852	0.9964649979581575	1.4	300	minian
16	5	0.13806623621586012	0.9962602822818343	0.9787799680585693	0.9952624248903699	1.4	300	minian
17	241	0.12445967506453576	0.998792839469227	0.9940470785504932	0.994274194023348	1.4	300	minian
19	151	0.15127061326551575	0.9977580785473348	0.9848590810604961	0.9947511250509782	1.4	300	minian
20	72	0.3999735524377422	0.9921400530051159	0.9774518385091742	0.9891483060694496	1.4	300	minian
21	214	0.23699699391790524	0.9940747348305573	0.9672300680397063	0.9905808732907069	1.4	300	minian
22	196	1.2124792556219859	0.9508922755681102	0.805360273134745	0.7785557996644983	1.4	300	minian
23	45	0.3104520609757713	0.9944352181199583	0.977078331917302	0.9875076174677576	1.4	300	minian
24	109	0.17918685621262537	0.9958499665073887	0.9879137680889908	0.9955664465472223	1.4	300	minian
26	240	0.16494549871196262	0.9984757104323195	0.9738954995467612	0.9951685553192496	1.4	300	minian
27	114	0.18536127595371674	0.9940202190239192	0.9855390798425615	0.9952102190465535	1.4	300	minian
29	81	0.3866624318988719	0.9950359028304335	0.9837939144653359	0.995168649114404	1.4	300	minian
30	122	0.11815295086380541	0.9914443545866405	0.9787812724586321	0.997359339496527	1.4	300	minian
31	224	0.13591313315978104	0.9948310922128379	0.9880966602171968	0.9957697725570696	1.4	300	minian
32	149	0.13642438637408427	0.9975737576848085	0.9834623729111347	0.9941925369016681	1.4	300	minian
33	52	0.5221518865623853	0.9875929156061705	0.9607740160606605	0.9897403394390625	1.4	300	minian
34	209	0.5228527414971104	0.989310598161618	0.9517628807798616	0.9814571692237715	1.4	300	minian
35	65	0.9512212016883094	0.9827566407779375	0.9845232423352076	0.9960098914469004	1.4	300	minian
36	161	0.058762577311884584	0.9977757250793636	0.9835687682554821	0.994316577493376	1.4	300	minian
37	265	0.350380792742168	0.9845964459379009	0.9829965438332279	0.9954114345514706	1.4	300	minian
38	74	0.9984709580093076	0.9717611801811109	0.8072243036571143	0.8167874320346561	1.4	300	minian
39	197	0.15443385018967667	0.9967816741071783	0.8967042663287157	0.9937797184990131	1.4	300	minian
40	92	0.09370012461849621	0.9976879942910035	0.9884634420476178	0.9950872999098543	1.4	300	minian
41	250	0.31350733289722527	0.9960916838009108	0.9903642133716203	0.9965671033338347	1.4	300	minian
42	267	0.14900144059755432	0.9983581077258217	0.9765358554680079	0.9959949220105204	1.4	300	minian
44	222	0.39538258107297364	0.990342055618056	0.9343886849980809	0.9888643019064673	1.4	300	minian
45	153	0.06732192268434914	0.9943679018740748	0.9133849923290959	0.9934680238552492	1.4	300	minian
46	30	0.1775743630174197	0.9971147850632414	0.9839109712248686	0.9965890332642652	1.4	300	minian
47	211	0.285218380876792	0.9945283973634065	0.9781309596563204	0.9952126393873749	1.4	300	minian
48	17	2.055902327819029	0.9166699436535273	0.7942529924743784	0.7556681288146748	1.4	300	minian
49	64	0.22094346356560646	0.9976619283175112	0.990315408997831	0.9937491501319579	1.4	300	minian
50	248	0.45051679933186184	0.9926510334750109	0.9813292120508391	0.9932677820669672	1.4	300	minian
51	28	0.20292058745763875	0.9975683581909299	0.9821980463353517	0.9907759823657342	1.4	300	minian
52	13	0.1825038857025457	0.9955913814442151	0.9899558429110277	0.995878619219438	1.4	300	minian
53	4	0.27176869759584577	0.9960603576138465	0.991278497342166	0.9961642321654403	1.4	300	minian
55	203	0.4169102910925884	0.9926546635444089	0.9834871284381627	0.9897643444589427	1.4	300	minian
56	226	0.25632265641757057	0.9945375744048562	0.9920426720476813	0.9971526430102018	1.4	300	minian
57	245	0.7485665318234822	0.9816911524538883	0.9702992532239894	0.9860254714410919	1.4	300	minian
58	95	0.2902194489079006	0.994759045697545	0.9904591284194291	0.992097305899093	1.4	300	minian
59	158	0.13516248941809123	0.9968405722916939	0.9759001690067768	0.9937271799079763	1.4	300	minian
60	210	1.1382889039602935	0.9667705900290676	0.7374355877229036	0.7807166513387213	1.4	300	minian
61	262	0.7561091993959421	0.9819832662366269	0.7418418843257805	0.7919470712121098	1.4	300	minian
62	10	0.07156660033584135	0.9981685244638749	0.9845188705638802	0.9949266509247456	1.4	300	minian
64	233	0.17572543716823122	0.9980000712652943	0.9878044469681873	0.9947886927011813	1.4	300	minian
65	180	0.18376853821269806	0.9939536229639107	0.979491594494738	0.9943668029991359	1.4	300	minian
66	120	0.2828478708526477	0.9967142488379449	0.9836382826903569	0.9964916090651031	1.4	300	minian
68	127	1.5522599116414006	0.9495912956741794	0.5978800818772538	0.9445982043592982	1.4	300	minian
69	83	0.481177724514295	0.9930603333918334	0.9860612253203166	0.9927708433820053	1.4	300	minian
70	258	0.44384483312970374	0.9940140512013212	0.9936984266318025	0.9959055374186674	1.4	300	minian
71	175	0.23773024353728622	0.9973086392570858	0.9689973980213217	0.994956112548833	1.4	300	minian
72	206	0.5377312654882763	0.985802372003859	0.9736525393114214	0.9939573505287627	1.4	300	minian
73	178	0.427593269254524	0.980496438752737	0.9187161054532492	0.994190002283078	1.4	300	minian
74	270	0.2863750466275037	0.9949936865934588	0.9783871706635544	0.991858023131238	1.4	300	minian
75	75	0.27024570771066775	0.9968328499429474	0.9767425839705111	0.9932927149940756	1.4	300	minian
76	219	1.4616433465903855	0.9620208931034852	0.7275440003143948	0.7765554218493872	1.4	300	minian
77	56	0.14030234439173472	0.9985486835324211	0.9814564452043057	0.9908582939191445	1.4	300	minian
78	33	0.3413146519394082	0.9943636097499468	0.9863908869606697	0.9970382852012777	1.4	300	minian
80	235	0.18117254379099698	0.9952214383113667	0.9878992561353499	0.9923797716318417	1.4	300	minian
81	259	0.2605371603697828	0.9947431225170779	0.9841034086788337	0.9929147120702154	1.4	300	minian
82	100	0.2424161740652988	0.9937431866557909	0.9856789622545261	0.9971454484072623	1.4	300	minian
83	191	0.20675838854996792	0.9954618416992649	0.9488513463760421	0.9864792015577208	1.4	300	minian
84	36	0.2101565264107906	0.9889504934796166	0.9739324428789568	0.9947165521141003	1.4	300	minian
85	123	0.16567535862103341	0.9962096238030853	0.9881403515849208	0.992552918249564	1.4	300	minian
86	141	0.2594854961589469	0.9874646730767433	0.9658413066448983	0.9927005424817138	1.4	300	minian
87	49	0.18669884079912977	0.9984118079507663	0.9850978331527387	0.9933523491782656	1.4	300	minian
88	138	0.45628580571557803	0.9916682671215861	0.9740415623376956	0.9880109338417288	1.4	300	minian
89	20	0.10349831911392901	0.9969041337851402	0.9861271454582892	0.9963121865673528	1.4	300	minian
90	79	0.34450115489794825	0.9960168275795912	0.8874776093304191	0.9959263809181302	1.4	300	minian
91	104	0.35104289838664643	0.9946745312659486	0.9677330276940137	0.9932525409081994	1.4	300	minian
92	220	0.2619349957841347	0.9960280563324959	0.9346281918950256	0.994377464425347	1.4	300	minian
93	6	0.5027143368113219	0.987707581572924	0.9712651931644626	0.9945143187174793	1.4	300	minian
94	188	0.028561196937608727	0.9982901556079242	0.9891541211256921	0.9965619525348951	1.4	300	minian
95	208	0.24158650524862318	0.9951085211617934	0.9752464728875915	0.9944775919780316	1.4	300	minian
96	88	0.312700628617741	0.9940145037774003	0.9686301617272919	0.9884992496747942	1.4	300	minian
97	192	0.2739109376663656	0.9928391408442926	0.9857733230370448	0.9960501320809951	1.4	300	minian
98	106	0.3592481963493898	0.992338787648416	0.9830362898719912	0.9913440390806214	1.4	300	minian
99	96	0.49787997361215175	0.9891823988842263	0.9913908004762237	0.991934168507492	1.4	300	minian
100	225	0.2681950418854974	0.9962229220500493	0.9916776039621884	0.9937156791046299	1.4	300	minian
101	172	0.2822047503158333	0.9975446878201468	0.987988252407033	0.9961850413955179	1.4	300	minian
102	50	0.6634316072669895	0.9923370699345756	0.9858267779426931	0.9925288327135378	1.4	300	minian
103	111	0.3247305164580866	0.9929997900049393	0.9744899624906862	0.9899571319620002	1.4	300	minian
104	136	0.06307332206380938	0.9965806308748213	0.9787977518689513	0.9957236366946648	1.4	300	minian
105	264	0.41649426833025516	0.991247908257024	0.9821884179898568	0.9872658722922042	1.4	300	minian
106	19	2.280181830610597	0.9313352093157794	0.6953951995088192	0.7462654045750057	1.4	300	minian
107	176	0.39223431935530795	0.9861371937661937	0.9840593081277687	0.9907025944111469	1.4	300	minian
109	67	0.38562385926354337	0.9897887876430861	0.9867692631106024	0.9898078164593996	1.4	300	minian
110	35	0.3310537166051493	0.9960441144304679	0.992272130197248	0.9946353979734363	1.4	300	minian
111	162	0.23091752096335938	0.995106786765013	0.9801845601313911	0.9948588519167681	1.4	300	minian
112	254	0.4614592766119683	0.9892838261070526	0.9864066361517521	0.9971641303123485	1.4	300	minian
113	232	0.2070862011702555	0.9976620663758267	0.9817701629902752	0.9976522246419892	1.4	300	minian
114	98	0.15495986104280154	0.9952302785895594	0.9843236062106341	0.9925502995598793	1.4	300	minian
115	144	0.2592790624494611	0.9942676155462266	0.9844709649512675	0.9956405975521209	1.4	300	minian
117	174	0.3821034671642186	0.9923714622021176	0.9161478766357876	0.9937103439543385	1.4	300	minian
118	207	0.1617627205838503	0.9951279510226173	0.933585475073264	0.9920580437327664	1.4	300	minian
119	21	0.39891518903804957	0.9946735224393365	0.9712582211786139	0.9895668512940071	1.4	300	minian
120	86	0.3791164723045395	0.9902205822186554	0.9746170817103769	0.9896367460772327	1.4	300	minian
122	139	0.10593625722666196	0.9959499212582674	0.9864305348669618	0.9950278649496701	1.4	300	minian
123	212	0.41514486057917027	0.9940007956291764	0.9910085126819717	0.9930997617974296	1.4	300	minian
124	128	0.21670690631438483	0.997793679770266	0.9872814920030879	0.9939890674625546	1.4	300	minian
126	193	0.10254095766778051	0.9896775395368633	0.9835657666128987	0.9952535567114703	1.4	300	minian
127	129	0.12239701788972501	0.9930369832474999	0.9818427387458192	0.9939169840599655	1.4	300	minian
128	171	0.22946217228260232	0.9976064976793878	0.9582852505457877	0.9972779400393826	1.4	300	minian
129	29	2.0491665711079845	0.924071028805015	0.7190686429020253	0.7061925838679758	1.4	300	minian
130	190	0.3083416449386077	0.9929948774964381	0.9917464703515364	0.9934929082476261	1.4	300	minian
131	73	0.09915465213173198	0.9968707514520511	0.9704125622623743	0.9942754439369776	1.4	300	minian
132	85	1.6047837677864356	0.9501179808634024	0.7998148485283532	0.8181071010992398	1.4	300	minian
133	97	0.25454311161675447	0.9928167020038356	0.985789039007797	0.9926053555593106	1.4	300	minian
134	260	0.19187082964880933	0.9981110375395487	0.9726836987257771	0.995872451229335	1.4	300	minian
135	66	0.34201840680657236	0.9809129340800437	0.9593309073904013	0.9920707573417241	1.4	300	minian
136	61	0.09390119548258527	0.9964097958737725	0.972966444604141	0.9927131668911134	1.4	300	minian
137	179	0.20727215425839832	0.9950811144126527	0.9403842435823943	0.9929492904224697	1.4	300	minian
138	152	0.4345997938657942	0.9921836747978603	0.9657596496371155	0.9907345023463155	1.4	300	minian
139	185	0.522434171623744	0.9851468255687496	0.9885154092488698	0.9941466271694022	1.4	300	minian
140	198	1.9041160322499775	0.9322215522688755	0.6653497807990542	0.695935104141257	1.4	300	minian
141	57	1.1187351170636928	0.9651184436508888	0.6744009734311825	0.7149611074724985	1.4	300	minian
142	70	0.08618029016957802	0.996753832702709	0.9864797464843866	0.9949276388212468	1.4	300	minian
143	257	0.2921364874385531	0.9974942450846083	0.9874848326301661	0.9960539421047121	1.4	300	minian
145	216	0.3819089895634308	0.9938268935755014	0.9758591863151266	0.9895450280898099	1.4	300	minian
146	199	0.10873392114001706	0.996165226732255	0.9072056043267911	0.9946629916924116	1.4	300	minian
147	184	0.1701266224016718	0.9964541913398277	0.9869474190521655	0.995905184227108	1.4	300	minian
148	134	0.560460544813543	0.977999506352207	0.7373886302935189	0.8400434105591552	1.4	300	minian
149	244	0.09498317211416316	0.9967731010086169	0.981322833630438	0.9958050145576184	1.4	300	minian
152	145	0.32808822532881604	0.995797200920804	0.977317470101984	0.9941786608029896	1.4	300	minian
153	133	0.4052407084687222	0.9863752818253355	0.9826477757815844	0.9955061568610968	1.4	300	minian
154	89	0.4273492757264438	0.993522902836233	0.9715910570327932	0.9915736877535146	1.4	300	minian
155	1	0.25120498247009176	0.9969984946372231	0.9830541362689715	0.991411766570248	1.4	300	minian
156	182	0.2927881276627812	0.9948024116462577	0.9896301729593611	0.9967195240042621	1.4	300	minian
157	84	0.22441039135122007	0.9901330390178805	0.9818217267354518	0.9911282402926992	1.4	300	minian
158	115	0.1406290835254854	0.9971913714556063	0.988666142787541	0.994317694179418	1.4	300	minian
159	147	0.13885943002652096	0.9953995275291322	0.9274632517302231	0.9931491474511821	1.4	300	minian
160	63	0.1328125024797173	0.9974266997757542	0.9879619448977484	0.9932886036613658	1.4	300	minian
161	46	0.35653065849284676	0.9941809085896152	0.9719569739892919	0.9955693073329033	1.4	300	minian
162	48	0.11779094540694575	0.995604755494209	0.9750459599635487	0.9893881947716184	1.4	300	minian
164	42	0.22408797093773342	0.9961262153992537	0.9602201114368434	0.9938797945568681	1.4	300	minian
165	26	0.29589881236168236	0.9913741641130138	0.9583741105625349	0.9938856541483165	1.4	300	minian
166	266	0.5861839147547372	0.9867816147064289	0.9741039147202576	0.9876392601600429	1.4	300	minian
167	252	0.3364117752287262	0.9932394926547992	0.9690828627729897	0.9923003983071348	1.4	300	minian
168	112	0.15088077860041055	0.9946036932221779	0.9876707668157555	0.9965386956370901	1.4	300	minian
169	204	0.16491254395277843	0.9973355244718075	0.9898998828268525	0.9949763146880797	1.4	300	minian
170	108	0.11031386602417032	0.9901662733301534	0.9637798875702274	0.9904201964289698	1.4	300	minian
171	58	0.2037836274551543	0.9956727190665638	0.9836129330701988	0.9952351523531457	1.4	300	minian
172	157	0.12613074279278857	0.9983684657315596	0.9882862692640494	0.9971080709440001	1.4	300	minian
173	131	0.1485273238047828	0.9932108675433051	0.9892131275887325	0.9943115222095944	1.4	300	minian
174	195	0.2513142872305058	0.9946402553447286	0.9905828876501084	0.995656466895601	1.4	300	minian
175	8	0.22160127460982895	0.9928659835210848	0.9885862947188712	0.9946280522903401	1.4	300	minian
176	160	0.19207744958500986	0.9951784256780651	0.9248374470822293	0.9929013358844704	1.4	300	minian
177	237	0.33036580149484546	0.992318915538248	0.9830082443312333	0.992582313766775	1.4	300	minian
178	181	0.11472262531936421	0.9932481749897126	0.9840834153994392	0.9948798919629676	1.4	300	minian
179	118	0.3358691102951373	0.9924625419085172	0.9819224461364934	0.9902972558920262	1.4	300	minian
180	227	1.3698806861092951	0.9588172317740359	0.7284251694273425	0.737385967572203	1.4	300	minian
181	22	0.13436719553688084	0.9960667679726846	0.9859228265135541	0.9964672842710701	1.4	300	minian
182	16	0.23467826799272135	0.9945747713627072	0.9806064819892186	0.9927718879057452	1.4	300	minian
183	249	1.8991293303034829	0.925745937642586	0.7225635957108484	0.7511823413141463	1.4	300	minian
184	41	0.38283781758233193	0.993780550786588	0.9447549741433156	0.9896925905938077	1.4	300	minian
185	269	0.2394967142054402	0.9976491561275942	0.9918332187659236	0.9945547339776117	1.4	300	minian
186	25	0.47544796946293594	0.9955923981322694	0.9684167315467221	0.9891167122394294	1.4	300	minian
187	43	0.4079118595395832	0.9919845673291635	0.9580085887700849	0.9887726355468951	1.4	300	minian
189	236	0.2153173494019208	0.9976385284112429	0.9898625561972738	0.9965773756765801	1.4	300	minian
190	80	0.1557506523726546	0.9975770928887535	0.9465468060668353	0.9954492745591056	1.4	300	minian
191	44	0.09392246566622539	0.9958201093441634	0.941744016565552	0.9891627529336797	1.4	300	minian
192	194	0.26593796488252763	0.9936967863857543	0.9388104594645728	0.9883680837392791	1.4	300	minian
193	169	0.1894741288200321	0.9964335372621075	0.9635758363740089	0.994065373116006	1.4	300	minian
194	9	0.241455495700793	0.9979345356106846	0.9275831565687687	0.9934830426151817	1.4	300	minian
195	68	0.4681289693453235	0.9907938821558572	0.9740460597527403	0.9777518577714054	1.4	300	minian
196	187	0.23261746400532377	0.9965636381551786	0.9921375892106722	0.9960853352421677	1.4	300	minian
198	54	0.14374946305562936	0.996231524074602	0.9834012703504178	0.9927575164581073	1.4	300	minian
199	163	0.2576867216989556	0.9961493433444459	0.9886506360378493	0.9935759955355087	1.4	300	minian
200	31	1.5243814873239394	0.9575255846704774	0.7774203967023493	0.7976833367872057	1.4	300	minian
201	99	0.2901604044680334	0.9957027718875122	0.9877003645964562	0.9953786608433256	1.4	300	minian
202	15	0.3161053875312412	0.9927687099888156	0.984244185011106	0.9952899022319154	1.4	300	minian
203	27	0.9334941043279099	0.9783019028881115	0.7205991328040382	0.7569905717406956	1.4	300	minian
204	150	0.10895374038876383	0.9935485193727672	0.9753979984003134	0.991821793218141	1.4	300	minian
205	251	0.13248375593294398	0.996306806271684	0.9524202348107972	0.9947758908735632	1.4	300	minian
206	107	0.0859817838986759	0.9983786029958129	0.9877801992132461	0.9935154404835044	1.4	300	minian
207	231	0.09339649645623883	0.9977592656546885	0.982210170667957	0.9961819928708845	1.4	300	minian
210	213	0.09667501222404266	0.9966416113754671	0.9937423508748794	0.9974821606988449	1.4	300	minian
211	229	0.36119971922181965	0.9943241228576777	0.9888728611338332	0.9955732610824768	1.4	300	minian
212	101	0.2990626485695822	0.9973885945154102	0.9274158104345142	0.9934950979959144	1.4	300	minian
213	221	0.06105067759138312	0.9897745044515769	0.8141924806281855	0.9953868362926407	1.4	300	minian
215	247	0.21702463286297227	0.9846348445655823	0.9497423106040117	0.972388932448037	1.4	300	minian
216	132	0.30730877459447303	0.9959895750480733	0.9831102834382068	0.9957679605407936	1.4	300	minian
217	87	0.10844823842716275	0.9956475846967898	0.9901377736321483	0.9934684099718376	1.4	300	minian
218	116	1.4123441219625341	0.9764525064234227	0.9253694537470687	0.9655310204100952	1.4	300	minian
219	170	2.0324927201409224	0.9020343376431194	0.7283387054323057	0.7166652206462951	1.4	300	minian
220	62	0.25069296808723823	0.9957721222229676	0.933946224019747	0.9901836930405499	1.4	300	minian
221	82	0.2765728057927289	0.9961559026297406	0.9889356418806444	0.9946467884399017	1.4	300	minian
222	90	0.2740973982310318	0.9922781730446464	0.8332752785818893	0.9942860661948953	1.4	300	minian
223	18	0.1410193618315502	0.9945977443099483	0.9753939484211058	0.9944755177734191	1.4	300	minian
224	94	2.054543977600178	0.9183753690900782	0.6503893927249436	0.7458361330567866	1.4	300	minian
225	159	0.20789095319239353	0.9954445566962098	0.9535096647228694	0.9927463002920569	1.4	300	minian
226	60	0.3996131122712743	0.986109831282787	0.969961180936186	0.9933787424567593	1.4	300	minian
227	130	0.2926606123893953	0.9963313805925617	0.9828693977482056	0.9962897454639673	1.4	300	minian
228	268	0.11636608579650264	0.9933366653710477	0.9914389000619744	0.9959570997218591	1.4	300	minian
230	202	0.22902412279075074	0.994445254611766	0.9819759777582352	0.9915282955401865	1.4	300	minian
232	242	0.5895160479493438	0.9861931652480244	0.9921884723611387	0.9958602032271978	1.4	300	minian
233	121	0.3420531084272551	0.9962527476692772	0.9306150983263978	0.992786702654925	1.4	300	minian
234	253	0.13601613756239408	0.9975873292502763	0.9880039064767473	0.9958299077826182	1.4	300	minian
235	11	0.20350263426534873	0.9958320439426712	0.9668641928474591	0.9951266177270546	1.4	300	minian
236	125	0.20601076183021583	0.9919463117005036	0.980266953697997	0.9940218232129261	1.4	300	minian
237	14	0.1823310884355546	0.9965056297541658	0.9886118851141038	0.9956141849667149	1.4	300	minian
238	154	0.14711825885226085	0.9926681310752177	0.9836933393532502	0.9957149935645941	1.4	300	minian
239	34	0.2152620928787785	0.9959534716346881	0.9847372345949021	0.9956905756351606	1.4	300	minian
240	23	0.4682800864990095	0.9909988328473828	0.9934022705960349	0.9951536609475382	1.4	300	minian
241	238	0.27124937141003563	0.9968940862369997	0.9883181569332768	0.9959511376218789	1.4	300	minian
242	24	0.15593343741276047	0.9970693025109671	0.9721356627253486	0.9914362031475088	1.4	300	minian
243	156	1.3315272421157667	0.9647727665262598	0.6189178070596448	0.8391196684775628	1.4	300	minian
245	40	0.2279095320769589	0.991956126019291	0.9575314862180171	0.9926096740681798	1.4	300	minian
246	51	0.43148879575819815	0.9938364959100076	0.9764426093508356	0.9898674696467815	1.4	300	minian
247	155	0.22346886741130384	0.9930107545836567	0.959822312844496	0.9969771338481408	1.4	300	minian
248	218	0.395338395811681	0.992829868138472	0.9702179785241954	0.9946279421501937	1.4	300	minian
249	143	1.4629102733620143	0.9602714433699127	0.8427716194900039	0.8629312271431232	1.4	300	minian
250	32	0.3322914420759485	0.996973197830533	0.9844906083062527	0.9936435971077049	1.4	300	minian
251	164	0.32686431774742214	0.9963578899238753	0.9853172761013025	0.9937683403944925	1.4	300	minian
252	146	0.12172493804735926	0.9986379763873834	0.9906912758968166	0.9964294789119413	1.4	300	minian
253	37	0.015554242256937358	0.9976097322110631	0.9653396439802805	0.9905041076264645	1.4	300	minian
254	47	0.4105483948940947	0.9940415553162614	0.9909013940825365	0.9946605180441898	1.4	300	minian
255	124	0.23574516326268083	0.995448387592134	0.9862885471894689	0.9931532446202199	1.4	300	minian
256	71	1.7136350849311617	0.95095676636613	0.8631044158240642	0.8661336062326279	1.4	300	minian
257	102	1.7825454627585466	0.9405377044207182	0.8258673800192073	0.8754840471128353	1.4	300	minian
258	243	0.30094220774821867	0.9911929254029653	0.9771245310334999	0.9965313865334889	1.4	300	minian
259	234	0.22008898662157036	0.9939692644959774	0.985984526182	0.9944602948013717	1.4	300	minian
260	39	0.14015991766900332	0.9959725340654357	0.9818524013168205	0.993146380376207	1.4	300	minian
261	7	0.5866862985932949	0.990018413427047	0.9855738884219765	0.9910768778021326	1.4	300	minian
262	113	1.531635951932325	0.9430929248134438	0.7662687797145691	0.8069337739757002	1.4	300	minian
263	117	0.4541840465318918	0.9758985149995671	0.9531533441393802	0.9883769644924074	1.4	300	minian
264	126	0.47809018229228173	0.9942209259082352	0.9708983731159109	0.9945676181428349	1.4	300	minian
265	142	0.2375868771890273	0.9979765182751763	0.9922377317100955	0.9953612689859829	1.4	300	minian
266	3	0.28032625797586225	0.9956078620942564	0.9890951569329525	0.9941837690868524	1.4	300	minian
267	59	0.09943898516862641	0.9950092857320698	0.9782884341596532	0.9911046157360448	1.4	300	minian
268	223	0.5158389168467251	0.9923176591751875	0.976220103648711	0.9900390354055304	1.4	300	minian
269	93	0.11993342318352121	0.9963107775760538	0.9875939959639405	0.9899417890491797	1.4	300	minian
271	168	0.7118756829857319	0.9841751069974777	0.9229663708313013	0.9952956942046611	1.4	300	minian
272	55	0.26602534391262994	0.9938925485376062	0.903963500130974	0.9949436399627349	1.4	300	minian
273	228	0.32539459156349054	0.9959585033865036	0.9852636589640371	0.9974667797522909	1.4	300	minian
274	239	0.13941804854772918	0.9970458083541028	0.9601391693450085	0.9930616851826578	1.4	300	minian
275	38	0.4208014710477337	0.9929702235827695	0.9589106734639297	0.9913934832095244	1.4	300	minian
277	217	0.13898129608207116	0.998298672707087	0.9822189394963202	0.9917463076786729	1.4	300	minian
278	76	0.2852881936316698	0.9953064099800071	0.9856173529820154	0.9959322547414226	1.4	300	minian
279	246	1.3677924610032062	0.9565595275121994	0.7269702560583303	0.7441914365284211	1.4	300	minian
280	137	0.44944918598919037	0.9960910831291528	0.9805477924532803	0.9938657719084828	1.4	300	minian
281	53	0.16419967248937467	0.9957152654010457	0.9297235668080331	0.9901137985316699	1.4	300	minian
282	103	0.24635048522060154	0.9966469138652636	0.9759104905326609	0.9922693202597689	1.4	300	minian
283	205	0.20012297988999014	0.9950459309886487	0.9258002231197904	0.9914225785785831	1.4	300	minian
284	177	0.11149759330644236	0.9966288579028019	0.987428195872453	0.9968407773659224	1.4	300	minian
285	263	0.22668665331900348	0.9910434086645253	0.9857539566172078	0.9960025231253051	1.4	300	minian
286	167	0.19837809352106586	0.9943142273633411	0.9838055942007053	0.9932367352052648	1.4	300	minian
287	215	0.07804411926411513	0.9971653963499708	0.9849334140591465	0.994180387980159	1.4	300	minian
288	12	0.1730243250743097	0.9960943485162607	0.9823515888995439	0.9937395694828881	1.4	300	minian
290	135	0.19258628243425713	0.9975893589302798	0.9836562986570286	0.996495651081467	1.4	300	minian
291	0	0.13256728120260655	0.9952347621508593	0.9822939579948493	0.9952728265431002	1.4	300	minian
292	186	0.20704059780349615	0.991915430832602	0.9869200669596592	0.9938046323072616	1.4	300	minian
293	261	0.2242794354948991	0.9980668830131232	0.9689523075289302	0.9933002311171903	1.4	300	minian
294	256	0.2716842490528156	0.9974607130942988	0.9661569817489621	0.9970780812261584	1.4	300	minian
296	183	0.18584089390831257	0.997622927412009	0.9910352424649304	0.993075271959615	1.4	300	minian
297	78	0.21926989313936346	0.9982901097861814	0.9683634648902902	0.9929697991901596	1.4	300	minian
299	69	0.2776409568718292	0.9930494464972116	0.9798208219076259	0.9894709726068011	1.4	300	minian
1	342	0.32477123489528	0.9931500365655312	0.8939673960402711	0.9903166057320603	1.4	500	minian
2	427	0.3651630810996482	0.9873121932025977	0.9323241926299225	0.9948840956905773	1.4	500	minian
3	2	0.3560661414440527	0.9945439870223949	0.9895609241135518	0.9956390874178174	1.4	500	minian
5	258	0.9627229895365098	0.9668580966939097	0.8450470447771862	0.9559830182587287	1.4	500	minian
6	117	0.30814934915514774	0.9911150514916292	0.9489620843712925	0.9949456076189539	1.4	500	minian
8	128	0.20557380692713334	0.9970755574048155	0.9869239216930166	0.9936392294806368	1.4	500	minian
9	357	0.1610850532857659	0.9964791870775855	0.927316549853266	0.9918359607193238	1.4	500	minian
10	153	0.5792488375373168	0.9855948697328862	0.8539743997963364	0.8865646034098525	1.4	500	minian
11	90	0.35053166925086304	0.9923686310685882	0.9480990340416826	0.9904995131405825	1.4	500	minian
12	140	0.09714839452248103	0.9969552430208458	0.9733891175902611	0.9946485799772894	1.4	500	minian
14	139	0.5125034922400168	0.9895935193285368	0.9585452323814453	0.9960097224583693	1.4	500	minian
15	350	0.15075262711359283	0.9965996754143744	0.9856639318877277	0.9917485346212211	1.4	500	minian
16	217	0.20515088099264392	0.9958913632099091	0.9596499237846353	0.9953589019617118	1.4	500	minian
17	321	1.3793300526239392	0.962205189623886	0.8493995209457834	0.8472404483319619	1.4	500	minian
[truncated: 4,533 more rows]
