# Supplementary material for: Minian, an open-source miniscope analysis pipeline
Source: eLife. 2022 Jun 1;11:e70661. doi: 10.7554/eLife.70661 (PMC9205633; doi:10.7554/eLife.70661)
Supplement: Figure 18—source data 1. [file elife-70661-fig18-data1.csv]

pipeline	nfm	ncell	variable	value
CaImAn	4000	100	duration	8.334515420595805
CaImAn	12000	100	duration	24.71388920545578
CaImAn	20000	100	duration	39.84136385917664
CaImAn	28000	100	duration	63.35038496653239
CaImAn	4000	300	duration	10.191370173295338
CaImAn	12000	300	duration	28.412438058853148
CaImAn	20000	300	duration	46.553164573510486
CaImAn	28000	300	duration	64.4991576274236
CaImAn	4000	500	duration	9.575862928231556
CaImAn	12000	500	duration	29.03901481628418
CaImAn	20000	500	duration	46.9144171833992
CaImAn	28000	500	duration	59.55558295249939
CaImAn with visualization	4000	100	duration	9.098008294900259
CaImAn with visualization	12000	100	duration	28.293150361378988
CaImAn with visualization	20000	100	duration	41.66832422018051
CaImAn with visualization	28000	100	duration	67.58800879716873
CaImAn with visualization	4000	300	duration	10.832484551270802
CaImAn with visualization	12000	300	duration	30.35778405268987
CaImAn with visualization	20000	300	duration	49.913779111703235
CaImAn with visualization	28000	300	duration	69.1837347428004
CaImAn with visualization	4000	500	duration	10.264909636974334
CaImAn with visualization	12000	500	duration	31.23099170525869
CaImAn with visualization	20000	500	duration	50.76619245608648
CaImAn with visualization	28000	500	duration	70.3402283390363
Minian	4000	100	duration	7.870052393277486
Minian	12000	100	duration	17.997505724430084
Minian	20000	100	duration	29.150809212525687
Minian	28000	100	duration	39.408375493685405
Minian	4000	300	duration	10.384314556916555
Minian	12000	300	duration	22.81636832157771
Minian	20000	300	duration	36.57171657482783
Minian	28000	300	duration	49.65637058417003
Minian	4000	500	duration	12.262515942255655
Minian	12000	500	duration	27.083737325668334
Minian	20000	500	duration	42.93144075075785
Minian	28000	500	duration	58.30473332007726
Minian with visualization	4000	100	duration	10.729863687356312
Minian with visualization	12000	100	duration	24.504680168628692
Minian with visualization	20000	100	duration	39.62888474067052
Minian with visualization	28000	100	duration	54.43089555104574
Minian with visualization	4000	300	duration	13.7229629834493
Minian with visualization	12000	300	duration	30.541810301939645
Minian with visualization	20000	300	duration	49.058564364910126
Minian with visualization	28000	300	duration	67.53158574899038
Minian with visualization	4000	500	duration	15.956756774584452
Minian with visualization	12000	500	duration	36.03055531581243
Minian with visualization	20000	500	duration	57.36470345258713
Minian with visualization	28000	500	duration	78.1576733469963
CaImAn	4000	100	max_mem	10358.5625
CaImAn	12000	100	max_mem	35067.31640625
CaImAn	20000	100	max_mem	46231.25390625
CaImAn	28000	100	max_mem	78231.68359375
CaImAn	4000	300	max_mem	14148.3359375
CaImAn	12000	300	max_mem	35924.16015625
CaImAn	20000	300	max_mem	57309.35546875
CaImAn	28000	300	max_mem	78592.171875
CaImAn	4000	500	max_mem	12500.1875
CaImAn	12000	500	max_mem	38514.4609375
CaImAn	20000	500	max_mem	58912.20703125
CaImAn	28000	500	max_mem	83470.26953125
CaImAn with visualization	4000	100	max_mem	9137.70703125
CaImAn with visualization	12000	100	max_mem	32741.47265625
CaImAn with visualization	20000	100	max_mem	46037.75390625
CaImAn with visualization	28000	100	max_mem	78232.1640625
CaImAn with visualization	4000	300	max_mem	13076.203125
CaImAn with visualization	12000	300	max_mem	35273.70703125
CaImAn with visualization	20000	300	max_mem	57355.89453125
CaImAn with visualization	28000	300	max_mem	78679.05859375
CaImAn with visualization	4000	500	max_mem	11749.125
CaImAn with visualization	12000	500	max_mem	36990.77734375
CaImAn with visualization	20000	500	max_mem	59115.3984375
CaImAn with visualization	28000	500	max_mem	80050.4921875
Minian	4000	100	max_mem	9994.20703125
Minian	12000	100	max_mem	12033.140625
Minian	20000	100	max_mem	14616.89453125
Minian	28000	100	max_mem	15695.25
Minian	4000	300	max_mem	11771.359375
Minian	12000	300	max_mem	14006.734375
Minian	20000	300	max_mem	15276.7421875
Minian	28000	300	max_mem	16927.3046875
Minian	4000	500	max_mem	14986.67578125
Minian	12000	500	max_mem	17452.6875
Minian	20000	500	max_mem	18699.625
Minian	28000	500	max_mem	19875.88671875
Minian with visualization	4000	100	max_mem	9337.5
Minian with visualization	12000	100	max_mem	11754.8046875
Minian with visualization	20000	100	max_mem	14943.45703125
Minian with visualization	28000	100	max_mem	15651.93359375
Minian with visualization	4000	300	max_mem	11609.48828125
Minian with visualization	12000	300	max_mem	13562.40625
Minian with visualization	20000	300	max_mem	15014.33984375
Minian with visualization	28000	300	max_mem	16603.4609375
Minian with visualization	4000	500	max_mem	14358.34375
Minian with visualization	12000	500	max_mem	16294.83203125
Minian with visualization	20000	500	max_mem	17663.1015625
Minian with visualization	28000	500	max_mem	19425.5703125
