# Supplementary material for: Minian, an open-source miniscope analysis pipeline
Source: eLife. 2022 Jun 1;11:e70661. doi: 10.7554/eLife.70661 (PMC9205633; doi:10.7554/eLife.70661)
Supplement: Figure 19—source data 1. [file elife-70661-fig19-data1.csv]

pipeline	nps	duration	max_mem
CaImAn	2	77.9759126106898	69215.88671875
CaImAn	3	68.837062839667	74470.5703125
CaImAn	4	65.47688008944193	79816.11328125
CaImAn	5	64.84075057109197	82389.6875
CaImAn	6	61.58795080979665	84808.56640625
CaImAn	7	61.36993690331777	87639.84375
CaImAn	8	61.704767711957295	89891.9609375
CaImAn	9	60.895398374398546	92425.07421875
CaImAn	10	60.58170967499415	94651.171875
Minian	2	97.35749799013138	8513.18359375
Minian	3	70.38448634545009	11379.55078125
Minian	4	58.721501274903616	14942.7109375
Minian	5	53.13507652282715	18407.63671875
Minian	6	48.789500653743744	20620.015625
Minian	7	45.721118517716725	23224.1953125
Minian	8	43.225914132595065	27649.2578125
Minian	9	40.75802691380183	29688.84765625
Minian	10	39.76763682365417	32545.58984375
