# Supplementary material for: Minian, an open-source miniscope analysis pipeline
Source: eLife. 2022 Jun 1;11:e70661. doi: 10.7554/eLife.70661 (PMC9205633; doi:10.7554/eLife.70661)
Supplement: Figure 20—source data 1. [file elife-70661-fig20-data1.csv]

hshift	wshift	corr
-50	-50	0.0035545679036012453
-50	-49	-0.020587785461393875
-50	-48	-0.01793544126829007
-50	-47	-0.044449240319647636
-50	-46	-0.050900412867092286
-50	-45	-0.03816091530858668
-50	-44	-0.042924228588781414
-50	-43	-0.022783509321214392
-50	-42	-0.028540859226684694
-50	-41	-0.03314915627479892
-50	-40	-0.026521849347260623
-50	-39	-0.024542750900041262
-50	-38	-0.004892956232324677
-50	-37	0.019766135524364646
-50	-36	0.0038404283606494616
-50	-35	0.009629281398844352
-50	-34	0.0156592465072023
-50	-33	0.023827496154957547
-50	-32	0.027325635423781237
-50	-31	0.01990859974874212
-50	-30	0.018747814013183053
-50	-29	0.00485985368730488
-50	-28	-0.0036083419947563603
-50	-27	-0.01137417026080482
-50	-26	0.001746572855217955
-50	-25	-0.008827031583919592
-50	-24	0.005902041659851888
-50	-23	-0.013491485841900722
-50	-22	-0.03490940252581309
-50	-21	-0.04426108790175454
-50	-20	-0.025765207742831163
-50	-19	-0.012536183820468812
-50	-18	0.0006696477428248737
-50	-17	-0.010698501964884062
-50	-16	-0.021218820205128382
-50	-15	-0.011307913232569432
-50	-14	-0.004670798663796671
-50	-13	0.004337702655167074
-50	-12	-0.0006037428971118814
-50	-11	0.001568094574647296
-50	-10	0.006723158512965959
-50	-9	-0.0012133097427649037
-50	-8	-0.0004167661073887734
-50	-7	0.011845878686590615
-50	-6	0.018603130442101618
-50	-5	0.031495839321194874
-50	-4	0.01952091946119809
-50	-3	0.01579652130819377
-50	-2	0.021851865011708847
-50	-1	0.00920171045404589
-50	0	0.009445531276326753
-50	1	0.002448378890584763
-50	2	-0.025859350648132533
-50	3	-0.02309323032784567
-50	4	-0.02196705392008933
-50	5	0.0017740091132813303
-50	6	-0.012238248798249727
-50	7	-0.002574080013772518
-50	8	0.009537286927968961
-50	9	0.0038963612919272563
-50	10	0.012931086480763965
-50	11	0.01563878507969268
-50	12	-0.00478795380915016
-50	13	-0.010701233472897162
-50	14	-0.022792802160708028
-50	15	-0.0074825407228119225
-50	16	-0.0032136647262688933
-50	17	-0.017458280303375543
-50	18	-0.018483468987824537
-50	19	-0.016475103291316757
-50	20	-0.0010452225231102348
-50	21	0.002276678957055115
-50	22	0.015674768629713294
-50	23	0.018469927242233928
-50	24	0.013964885973300716
-50	25	0.019303303909484985
-50	26	0.02115640183031597
-50	27	0.01759278753617077
-50	28	0.01572310481568741
-50	29	-6.480361776513223e-05
-50	30	-0.007117345258250852
-50	31	-0.015410982468184536
-50	32	-0.0072146592009814554
-50	33	-0.012367421558064882
-50	34	-0.02011972708073678
-50	35	-0.0052621579010898
-50	36	0.0014979901947780507
-50	37	0.01116611856807939
-50	38	-0.009442456277102008
-50	39	-0.010633433352648347
-50	40	-0.017461669202285465
-50	41	-0.023355935817523526
-50	42	-0.002665943605679915
-50	43	-0.015227197750961244
-50	44	-0.027600873098497687
-50	45	-0.02941911187367031
-50	46	-0.017393752996457176
-50	47	-0.015370448734098097
-50	48	0.016271336934319643
-50	49	0.03407671512426689
-50	50	0.02817653645244117
-49	-50	-0.008073112949911697
-49	-49	-0.04667731880600058
-49	-48	-0.034909616635895875
-49	-47	-0.045640969196883645
-49	-46	-0.03422162685981914
-49	-45	-0.04252666149302387
-49	-44	-0.02632374179526315
-49	-43	-0.027139146100015075
-49	-42	-0.03275486065215283
-49	-41	-0.029396248135496197
-49	-40	-0.018749593877137646
-49	-39	-0.0210540497805297
-49	-38	-0.010451925416290968
-49	-37	0.014623891815988449
-49	-36	0.003501047893262104
-49	-35	0.010227015983480393
-49	-34	0.026284592421018084
-49	-33	0.03376536603253863
-49	-32	0.021663418529219377
-49	-31	0.027839403275217146
-49	-30	0.03589560505901534
-49	-29	0.006135685859826365
-49	-28	-0.012944798621869516
-49	-27	-0.015317095445086979
-49	-26	0.003335643954380233
-49	-25	-0.011397665072158497
-49	-24	-0.010209213992970218
-49	-23	-0.029825820112894624
-49	-22	-0.04460812605350257
-49	-21	-0.030719396479862573
-49	-20	-0.029513066725421984
-49	-19	-0.016606105848393088
-49	-18	0.0024072137671901895
-49	-17	-0.00641325781450815
-49	-16	-0.006813794970596631
-49	-15	0.0033017269792972957
-49	-14	0.0024890424006445157
-49	-13	-0.0010604245765022168
-49	-12	0.019745881732448636
-49	-11	-0.0026385464868799073
-49	-10	6.890684375107551e-05
-49	-9	0.006316715151563936
-49	-8	0.0043304549494423295
-49	-7	0.024744366735884937
-49	-6	0.0333150803254887
-49	-5	0.026202208167626615
-49	-4	0.015851800491985448
-49	-3	0.033036983167120455
-49	-2	0.012766482536886115
-49	-1	0.02352211704053211
-49	0	0.009728895864012009
-49	1	-0.005348632095128981
-49	2	-0.030904836356387674
-49	3	-0.02637393609235356
-49	4	-0.02178648808890828
-49	5	-0.011474126592187894
-49	6	-0.00867071928936274
-49	7	-0.0033845678470284675
-49	8	-0.0021569850057932983
-49	9	-0.010557426513213439
-49	10	0.0025448819867605822
-49	11	0.019837291621916556
-49	12	0.01596468561093511
-49	13	-0.00383761574876201
-49	14	-0.017851863124467574
-49	15	-0.01569438659835005
-49	16	-0.013974640374201661
-49	17	-0.008594512831561874
-49	18	-0.006195408284889331
-49	19	0.00791212191113401
-49	20	-0.00532078962682906
-49	21	0.01203268100346263
-49	22	0.018983847971271887
-49	23	0.02691528610649633
-49	24	0.01447369108319722
-49	25	0.008893618763760278
-49	26	0.017610132834770264
-49	27	0.0038095616194052597
-49	28	0.01088101060580896
-49	29	-0.003820763085570848
-49	30	-0.014884744412387385
-49	31	-0.008485715460654433
-49	32	-0.013618762578947143
-49	33	-0.021367525962749403
-49	34	-0.011859800500116412
-49	35	0.0008942477487233046
-49	36	0.011625831375012396
-49	37	0.008823155326507367
-49	38	-0.0008752316960879589
-49	39	-0.0120203369936062
-49	40	-0.025975563851167047
-49	41	-0.003860576005146041
-49	42	0.00423293429638419
-49	43	-0.0184843003168851
-49	44	-0.02414247145885928
-49	45	-0.03188123429932837
-49	46	-0.01583485759254373
-49	47	-0.011503712683717643
-49	48	0.010883420523295833
-49	49	0.05287433269202776
-49	50	0.03531641706780807
-48	-50	-0.018924330406922922
-48	-49	-0.017267375214020712
-48	-48	-0.04218418237074838
-48	-47	-0.03954325088757432
-48	-46	-0.04410391391790136
-48	-45	-0.04525152437207127
-48	-44	-0.03168390993688412
-48	-43	-0.02815854939585461
-48	-42	-0.013376051511056223
-48	-41	-0.023279063753921473
-48	-40	-0.046961486578690564
-48	-39	-0.03039755971231102
-48	-38	-0.0018804679670296816
-48	-37	0.022124083712651597
-48	-36	0.008026131323902829
-48	-35	0.012120731468386981
-48	-34	0.014120460885243217
-48	-33	0.013302250208565836
-48	-32	0.026473390737007135
-48	-31	0.02145570034986238
-48	-30	0.03201539285033002
-48	-29	0.007945872144847316
-48	-28	-0.01769017139213554
-48	-27	-0.012311872725170816
-48	-26	-0.0047009668831015485
-48	-25	-0.022612853156214804
-48	-24	-0.03282522233925028
-48	-23	-0.01586522396221656
-48	-22	-0.026732419042422434
-48	-21	-0.032664428510174634
-48	-20	-0.022934849882591393
-48	-19	-0.015457973070532666
-48	-18	0.0067642068323956715
-48	-17	0.0019331696380078377
-48	-16	-0.015871501974614805
-48	-15	-0.0007978815633458272
-48	-14	-0.004107195740100671
-48	-13	0.01839937560237714
-48	-12	0.020094565957843237
-48	-11	0.0033635642831068148
-48	-10	0.00503082268227249
-48	-9	0.010363178675237608
-48	-8	0.01960557091172035
-48	-7	0.030839481676435392
-48	-6	0.027879927486942426
-48	-5	0.031421640975865146
-48	-4	0.017636345109220058
-48	-3	0.02807826802538839
-48	-2	0.004860261574639374
-48	-1	0.006749922251132142
-48	0	0.009552455370515028
-48	1	-0.005077580488023203
-48	2	-0.017939271367375068
-48	3	-0.025609630350958156
-48	4	-0.009662935856564667
-48	5	-0.014859903125387501
-48	6	-0.01846307786784771
-48	7	-0.014876629484193672
-48	8	-0.024741807426740897
-48	9	-0.02058001110054548
-48	10	-0.023898505993032754
-48	11	-0.004085322880335775
-48	12	0.006062798922820934
-48	13	0.013138399707845182
-48	14	-0.01609446007799991
-48	15	-0.017678407802242262
-48	16	0.0006241827202969183
-48	17	-0.007297107882453249
-48	18	-0.011362147633533281
-48	19	0.015261417470816982
-48	20	0.013939307253578233
-48	21	0.0242348086207652
-48	22	0.04822895908201885
-48	23	0.040385295735579044
-48	24	0.02903188504016292
-48	25	0.014325202226831302
-48	26	0.002994589669204751
-48	27	-0.008082217741541237
-48	28	-0.0213820066085052
-48	29	-0.009605825096711216
-48	30	-0.0042366548712167666
-48	31	-0.006078783731204494
-48	32	-0.011025728458115606
-48	33	-0.003910771598886066
-48	34	-0.0055364658109623
-48	35	0.012506795586540293
-48	36	0.031171568618959287
-48	37	0.019848162755528104
-48	38	-0.00041145348994190795
-48	39	-0.02669486853433275
-48	40	-0.008872679633973412
-48	41	-0.010288825137884372
-48	42	0.012160906109121841
-48	43	-0.010521610876987142
-48	44	-0.01616857703442078
-48	45	-0.028792030498283785
-48	46	-0.013375147236584293
-48	47	-0.001465089329915816
-48	48	0.012999956508737432
-48	49	0.024174288650161017
-48	50	0.01989237096506136
-47	-50	-0.023988556395089306
-47	-49	-0.026327339074327417
-47	-48	-0.015976020927275927
-47	-47	-0.04654255299867336
-47	-46	-0.04853990717748478
-47	-45	-0.02561252588735206
-47	-44	-0.044945750086025166
-47	-43	-0.042100478340683464
-47	-42	-0.03185531949278748
-47	-41	-0.0304530870246973
-47	-40	-0.030257541044832772
-47	-39	-0.037268023419515496
-47	-38	-0.03613549499965868
-47	-37	-0.01926639932270453
-47	-36	-0.01171898905354518
-47	-35	-0.009447034144123812
-47	-34	0.003278884957755397
-47	-33	0.010623187574338507
-47	-32	0.02560773599992439
-47	-31	0.038657554639505765
-47	-30	0.02070766857616434
-47	-29	0.0014439135428407173
-47	-28	-0.015635064597145802
-47	-27	-0.014556774166684838
-47	-26	0.0029743690410042258
-47	-25	-0.013908209181049689
-47	-24	-0.02456725618485074
-47	-23	-0.020857335993408593
-47	-22	-0.029745976941073598
-47	-21	-0.021842874915781435
-47	-20	-0.017596759080905137
-47	-19	0.003929953483765699
-47	-18	-0.0009695511658165782
-47	-17	0.005598560031814543
-47	-16	-0.007561066600283413
-47	-15	-0.010171454653216899
-47	-14	-0.006684871511238664
-47	-13	0.0052211934810568236
-47	-12	0.025358079126204063
-47	-11	0.027115249523738498
-47	-10	0.03278349341567495
-47	-9	0.021186612873795464
-47	-8	0.029971771576486624
-47	-7	0.0237963982459467
-47	-6	0.025144068399539584
-47	-5	0.020507020657436897
-47	-4	0.02971230174756877
-47	-3	0.02682167202556477
-47	-2	0.016078610189359528
-47	-1	-0.006368900601192712
-47	0	-0.004637899396653888
-47	1	-0.014726640184565763
-47	2	-0.014064666801788826
-47	3	-0.02530648122922455
-47	4	-0.001689680553760367
-47	5	0.002209188673367189
-47	6	-0.002639562604310708
-47	7	-0.00038180958280106684
-47	8	-0.02101320086820484
-47	9	-0.030496037180610988
-47	10	-0.018286434376340553
-47	11	0.0070949428578422945
-47	12	0.00930778144368128
-47	13	0.005617864267929737
-47	14	-0.01449119972953955
-47	15	-0.02301659970461947
-47	16	0.004137909575240794
-47	17	0.0023366866966563335
-47	18	0.019762315909655326
-47	19	0.021635008233418945
-47	20	0.026466595825258694
-47	21	0.02843077216185885
-47	22	0.04253333834618275
-47	23	0.03219541500171647
-47	24	0.03545965199340943
-47	25	0.019686694402676657
-47	26	0.0011074975465726093
-47	27	-0.041890630752258115
-47	28	-0.04228234499934812
-47	29	-0.039377107342656016
-47	30	-0.013260018189818859
-47	31	0.011435885646085877
-47	32	0.012086822267905431
-47	33	0.03287442868870499
-47	34	0.03140384301853521
-47	35	0.03142650568614629
-47	36	0.027821763327132872
-47	37	0.030051195643851652
-47	38	0.01458588195458912
-47	39	0.005616578214975578
-47	40	0.01930006826177368
-47	41	0.01643887825179526
-47	42	0.01748642762098576
-47	43	0.01590667694819922
-47	44	-0.0010485563862007794
-47	45	-0.016124305842342212
-47	46	-0.028206028442740127
-47	47	-0.00959421148889716
-47	48	-0.011462696920356811
-47	49	-0.008373329794913715
-47	50	0.009564758876741332
-46	-50	-0.02606263896124984
-46	-49	-0.03329835956808757
-46	-48	-0.03283927518957639
-46	-47	-0.03782543734257898
-46	-46	-0.04694338912904216
-46	-45	-0.037048700345181367
-46	-44	-0.04318498203032321
-46	-43	-0.038306986434888064
-46	-42	-0.03922506613247288
-46	-41	-0.04185460575973011
-46	-40	-0.039079720073606446
-46	-39	-0.05915015723295244
-46	-38	-0.04296383560475965
-46	-37	-0.026045648547274116
-46	-36	-0.02860664273029556
-46	-35	-0.023632941937361658
-46	-34	-0.014321155079199628
-46	-33	-0.008180900947310091
-46	-32	0.031103736861021615
-46	-31	0.0389300671215272
-46	-30	0.01875810819019268
-46	-29	0.008119102916023715
-46	-28	-0.011179057961179394
-46	-27	-0.00942886574643547
-46	-26	-0.00277335430179503
-46	-25	-0.01497064933425601
-46	-24	-0.03113432451530903
-46	-23	-0.032318560922993636
-46	-22	-0.036683792152472715
-46	-21	-0.020255716879567003
-46	-20	0.004337450829039382
-46	-19	0.006506034025539431
-46	-18	0.0035555533760423374
-46	-17	0.026589253187959735
-46	-16	0.022306757419629446
-46	-15	0.01671484945863281
-46	-14	0.015341944435586688
-46	-13	0.02708478218046178
-46	-12	0.003887266607230072
-46	-11	0.030861398624971167
-46	-10	0.0325081118048405
-46	-9	0.035755499007120196
-46	-8	0.027600352821684004
-46	-7	0.03907046412619892
-46	-6	0.01546785910306452
-46	-5	0.023713140534668314
-46	-4	0.006152761865204483
-46	-3	0.011233028603097031
-46	-2	0.016901272501104406
-46	-1	-0.008406440976283434
-46	0	-0.01336415175682648
-46	1	-0.01551793861374224
-46	2	-0.01501513939538794
-46	3	-0.009010216154468445
-46	4	0.0024108327438629447
-46	5	0.007389542036392431
-46	6	0.0015002292011559691
-46	7	-0.013823571033734067
-46	8	-0.017010576429855352
-46	9	-0.008462574347818656
-46	10	-0.001163935530108503
-46	11	0.006826232287249842
-46	12	0.0024900501853876516
-46	13	-0.002877213479613883
-46	14	-0.015266078853647768
-46	15	-0.017973269118414667
-46	16	0.01203922745185779
-46	17	0.012405279287727704
-46	18	0.02795164709513783
-46	19	0.03653126104266009
-46	20	0.03614396071739803
-46	21	0.02808934063919883
-46	22	0.028566875431879992
-46	23	0.024233634017681357
-46	24	0.017337111999150365
-46	25	0.008070984111226212
-46	26	-0.01601641135042016
-46	27	-0.014193515881736474
-46	28	-0.018365095206732344
-46	29	-0.018334736666826185
-46	30	-0.0004544937511206464
-46	31	0.009913479549389445
-46	32	0.017945176070728288
-46	33	0.0213003457654511
-46	34	0.011838578706659464
-46	35	0.025620300774852438
-46	36	0.032662980195555656
-46	37	0.036032133516603906
-46	38	0.023495421027720963
-46	39	0.0054693039252622245
-46	40	0.002284485832815673
-46	41	-0.009204432516402712
-46	42	0.018563732010157794
-46	43	0.020845502859289843
-46	44	0.011414332263807782
-46	45	-0.010814271976500324
-46	46	-0.022241003343599384
-46	47	-0.029086697784390134
-46	48	-0.005190476616963764
-46	49	-0.0057823038427106946
-46	50	0.00890356989833473
-45	-50	-0.030357452426716777
-45	-49	-0.0380039587123162
-45	-48	-0.031746901748286795
-45	-47	-0.043171685018989235
-45	-46	-0.055193676917207286
-45	-45	-0.05045583389497773
-45	-44	-0.05343847605252973
-45	-43	-0.053356789719911694
-45	-42	-0.037088389019244494
-45	-41	-0.0513491336110606
-45	-40	-0.04267543896310181
-45	-39	-0.0465699891958166
-45	-38	-0.03925001646316497
-45	-37	-0.019034122129169034
-45	-36	-0.015880383711815466
-45	-35	-0.023391417517827494
-45	-34	-0.011792777959631493
-45	-33	-0.0012784576741102043
-45	-32	0.02208683575247983
-45	-31	0.03333544216876639
-45	-30	0.029423757252422158
-45	-29	0.00784688499125946
-45	-28	-0.011951675409074464
-45	-27	-0.020761839365059227
-45	-26	-0.025880672128878908
-45	-25	-0.020998347746326567
-45	-24	-0.031529252101726045
-45	-23	-0.02682302397832854
-45	-22	-0.03683476969768999
-45	-21	-0.03249793588509664
-45	-20	-0.00368618387737819
-45	-19	0.011066146246345158
-45	-18	0.01642973028095047
-45	-17	0.01924644653368391
-45	-16	0.024641703883629212
-45	-15	0.026559306351170545
-45	-14	0.031071558287848352
-45	-13	0.0208915115166939
-45	-12	0.016218504609726077
-45	-11	0.026952093746435205
-45	-10	0.027495390696867954
-45	-9	0.039104311639219916
-45	-8	0.03629200661156146
-45	-7	0.02224087203463613
-45	-6	0.013152308443888407
-45	-5	0.014438722673186659
-45	-4	0.013072624670943046
-45	-3	0.015547779333540684
-45	-2	0.019713145686361868
-45	-1	0.00047842442058451565
-45	0	-0.006409896061218764
-45	1	-0.016255729083040342
-45	2	-0.01389845787464088
-45	3	-0.010876867021999904
-45	4	0.00021658432136590865
-45	5	0.005450444495694342
-45	6	0.0018961331245937977
-45	7	0.009950214896656267
-45	8	-0.004773172027962207
-45	9	-0.004594019823170474
-45	10	-0.008907676513142787
-45	11	-0.0027768877293942065
-45	12	0.00145887667370129
-45	13	-0.011860931661601714
-45	14	-0.028623712501023302
-45	15	-0.016809935065234163
-45	16	-0.0014796075830895488
-45	17	0.018200791847034173
-45	18	0.018376045853329484
-45	19	0.03179971609560976
-45	20	0.02530601399820302
-45	21	0.015739768498848672
-45	22	0.023147370716410418
-45	23	0.033622936399059666
-45	24	0.04240775805715983
-45	25	0.01590432698182494
-45	26	0.0019379734869993722
-45	27	0.004190573631949482
-45	28	-0.010835052304956305
-45	29	-0.00110491415017466
-45	30	0.002401149248253727
-45	31	0.0060659647324634225
-45	32	-0.003960000341351684
-45	33	0.01750942541208204
-45	34	0.018632687680193452
-45	35	0.016168960217590178
-45	36	0.028900829628430588
-45	37	0.04711195057324212
-45	38	0.04669165884551886
-45	39	0.042477244497865455
-45	40	0.022820948358897284
-45	41	0.016941550802119728
-45	42	0.01665496362973757
-45	43	0.015165474023283377
-45	44	0.01293075768842594
-45	45	0.004204011343652374
-45	46	0.006940788083678262
-45	47	-0.014009632953763463
-45	48	-0.006620028902628768
-45	49	-0.008471719739255605
-45	50	0.015429584415816612
-44	-50	-0.013768560397060507
-44	-49	-0.024258004407074405
-44	-48	-0.02664681685331721
-44	-47	-0.0381099806798315
-44	-46	-0.033772371443435506
-44	-45	-0.04571393286231125
-44	-44	-0.04670424040614829
-44	-43	-0.043270827176941216
-44	-42	-0.035441215823729236
-44	-41	-0.03812935901034813
-44	-40	-0.038121968223806264
-44	-39	-0.034330386307828066
-44	-38	-0.02554492061882064
-44	-37	-0.007174345312603644
-44	-36	-0.013222252496833313
-44	-35	-0.019215708346672713
-44	-34	-0.004822431397976564
-44	-33	0.0019027878771324847
-44	-32	0.008667188554401895
-44	-31	0.04818093007972155
-44	-30	0.03286046882492982
-44	-29	0.02210725272030053
-44	-28	-0.0050161671202017975
-44	-27	-0.012461005268884414
-44	-26	-0.02332572318156573
-44	-25	-0.02689558851858522
-44	-24	-0.04726181041209171
-44	-23	-0.021591253752894488
-44	-22	-0.03203988852522874
-44	-21	-0.019644942941742256
-44	-20	-0.0018780353099152034
-44	-19	0.02369969266450877
-44	-18	0.013344835208733183
-44	-17	0.006487892007212288
-44	-16	0.0034648763389701375
-44	-15	0.020714654907089576
-44	-14	0.009286808541286974
-44	-13	0.011016356339670082
-44	-12	0.00648201233347987
-44	-11	0.00982978043079045
-44	-10	0.012970837927975704
-44	-9	0.029178005891013208
-44	-8	0.03227087375655049
-44	-7	0.027347238403271367
-44	-6	0.02681176850579485
-44	-5	0.011150439120340278
-44	-4	0.00536975061282989
-44	-3	0.001584335662211372
-44	-2	0.006423464874690591
-44	-1	-0.0014611323385258113
-44	0	0.004635946296936089
-44	1	0.005624810076064646
-44	2	-0.005728981407821325
-44	3	0.005339137779337914
-44	4	0.0005915296205586294
-44	5	0.008987959486019386
-44	6	-0.008674336505270762
-44	7	0.005818308780771978
-44	8	0.005771401328736725
-44	9	0.002207772886580988
-44	10	0.013966705798729648
-44	11	0.002561065575313583
-44	12	0.007499980426919436
-44	13	-0.018695110346898122
-44	14	-0.022986659499285442
-44	15	-0.01670757919869155
-44	16	0.0003067989714769521
-44	17	0.008239118844114072
-44	18	0.013112857191920168
-44	19	0.032048210959807005
-44	20	0.007378775859475729
-44	21	0.019909089195682926
-44	22	0.020001302926790775
-44	23	0.026589559930846548
-44	24	0.041581948616884905
-44	25	0.03192557240164946
-44	26	0.016848166757051926
-44	27	0.0045408061148291675
-44	28	-0.01401763531468737
-44	29	-0.0006508768108883733
-44	30	0.017514489958976063
-44	31	0.023489120045465328
-44	32	0.009369609314145653
-44	33	0.004249214288183761
-44	34	0.0192331131164549
-44	35	0.013916174302622786
-44	36	0.04875898569441762
-44	37	0.054105266932583454
-44	38	0.05923387951594632
-44	39	0.05832770846738465
-44	40	0.024170055580028733
-44	41	0.02599261019135134
-44	42	0.013283226281704774
-44	43	0.02319348023840579
-44	44	0.01891137788687125
-44	45	0.012705210334307375
-44	46	0.007912817310587046
-44	47	-0.004815360050623589
-44	48	0.002507391370192857
-44	49	0.011246384229861872
-44	50	0.00867115022006687
-43	-50	-0.008870707993468119
-43	-49	-0.006983805830195926
-43	-48	-0.01610124473713749
-43	-47	-0.03266320793072843
-43	-46	-0.030765953909549
-43	-45	-0.03542242354661116
-43	-44	-0.03997601652256643
-43	-43	-0.031123682503562514
-43	-42	-0.018888880386630776
-43	-41	-0.031675283687582344
-43	-40	-0.030149513779492654
-43	-39	-0.023979874403199566
-43	-38	-0.0302386975144779
-43	-37	-0.009227507114991951
-43	-36	-0.0077830584193125715
-43	-35	0.004783881997921086
-43	-34	0.001876644025337082
-43	-33	0.014429301143817505
-43	-32	0.01906214543953815
-43	-31	0.030397615010199407
-43	-30	0.02201784575158
-43	-29	0.022073862916317615
-43	-28	-0.008617884728093673
-43	-27	-0.019479077531834078
-43	-26	-0.03147982700871226
-43	-25	-0.032266516425297244
-43	-24	-0.01407567817452851
-43	-23	-0.01741580562812766
-43	-22	-0.024407208201476113
-43	-21	-0.02814541644378733
-43	-20	-0.010259793740296121
-43	-19	-0.0026833037298518584
-43	-18	0.0033057571036159685
-43	-17	-0.007948742879368092
-43	-16	0.012213184017024422
-43	-15	0.0239584187468934
-43	-14	0.016490071371346945
-43	-13	0.004948375195312887
-43	-12	-0.0017727966107692259
-43	-11	-0.0054455097843520645
-43	-10	0.012191425833401744
-43	-9	0.004842603526263993
-43	-8	0.016699813793330513
-43	-7	0.0011009867414577886
-43	-6	-0.00019512308041972
-43	-5	0.006006026035716522
-43	-4	0.003923403171199765
-43	-3	-0.00022593481099329033
-43	-2	0.02370285891237158
-43	-1	-0.0066266445171889645
-43	0	0.0058100362893591375
-43	1	0.000804831134999008
-43	2	-0.0017115054093605208
-43	3	0.004396342960340483
-43	4	0.004978329825065758
-43	5	0.009511018827008597
-43	6	0.01379625772127309
-43	7	0.005778967711175608
-43	8	0.011616105784514039
-43	9	0.022235548288933264
-43	10	0.01238818909210518
-43	11	0.00016314293903178282
-43	12	-0.005080031322158131
-43	13	0.00917208263934689
-43	14	-0.005337312729930303
-43	15	-0.009956806134749507
-43	16	-0.007666406382283958
-43	17	0.020432771406969582
-43	18	0.034718264864215156
-43	19	0.023433961288921897
-43	20	0.013225659107566975
-43	21	0.012693244467138636
-43	22	0.01892010574657981
-43	23	0.030582598270277185
-43	24	0.051918603978332055
-43	25	0.03632605007874939
-43	26	0.019527434742645434
-43	27	0.0016523759759451658
-43	28	0.014051673441103781
-43	29	0.010376607920523882
-43	30	0.029428143242460215
-43	31	0.05014768662404435
-43	32	0.04484906682322926
-43	33	0.031552963379780134
-43	34	0.04220834671611098
-43	35	0.05719363879292356
-43	36	0.05450183145860769
-43	37	0.0790507722098399
-43	38	0.0572717327283965
-43	39	0.04685677260834459
-43	40	0.04597970665021264
-43	41	0.010999747541938065
-43	42	0.010167313208904242
-43	43	0.015122650323634936
-43	44	0.004760588390677243
-43	45	0.015868592704372197
-43	46	0.002162292999457973
-43	47	0.002758388903245089
-43	48	0.0021616607784276935
-43	49	-0.0033684335916028887
-43	50	0.009242902143185001
-42	-50	0.0034444621781558773
-42	-49	0.0026567266262902123
-42	-48	0.002312872725683385
-42	-47	-0.022320578101780317
-42	-46	-0.020538131415627072
-42	-45	-0.018180459801381107
-42	-44	-0.008879133171316235
-42	-43	-0.010002890923557476
-42	-42	-0.026342294201987523
-42	-41	-0.035487667320220975
-42	-40	-0.02430435178896706
-42	-39	-0.0320805562029416
-42	-38	-0.026729788092107316
-42	-37	-0.010588561608434882
-42	-36	0.017457851795997563
-42	-35	0.01211174343022308
-42	-34	0.026263584290333673
-42	-33	0.03874695334617668
-42	-32	0.04489711512929568
-42	-31	0.03795191136170381
-42	-30	0.023938710414650243
-42	-29	0.0021205913940335643
-42	-28	0.007182849066460729
-42	-27	-0.013845020175357292
-42	-26	-0.031089416695484703
-42	-25	-0.020155754108095163
-42	-24	-0.027891817492744476
-42	-23	-0.03276286617717745
-42	-22	-0.01964436661067558
-42	-21	0.0009887494951039567
-42	-20	-0.008106663590277983
-42	-19	0.020967952253111346
-42	-18	0.010881050948788901
-42	-17	0.00897014823164117
-42	-16	0.03067030284183947
-42	-15	9.27197982248182e-05
-42	-14	0.004092952736014326
-42	-13	0.012785883774978739
-42	-12	0.003392854341688131
-42	-11	-0.007922076929890486
-42	-10	-0.0007528567504167189
-42	-9	-0.001316523919134251
-42	-8	-0.0007764474651990372
-42	-7	0.009963004307040916
-42	-6	0.00883067265746501
-42	-5	-0.0011939164315659995
-42	-4	0.014260423946473954
-42	-3	0.015464598552663324
-42	-2	0.019786422905280703
-42	-1	0.0035167837228375983
-42	0	0.019741105430878064
-42	1	0.01419376272258398
-42	2	0.0029165892412413236
-42	3	-0.002481047653414649
-42	4	0.011097222853031809
-42	5	-0.0003574853157372946
-42	6	-0.0006795361589369601
-42	7	0.019053346222284547
-42	8	0.026788117372549856
-42	9	0.012626316369001368
-42	10	0.021915863001225302
-42	11	0.022915264606213247
-42	12	0.0058352110553639164
-42	13	-0.003104280647287988
-42	14	0.014479966361246219
-42	15	0.00034933367450748433
-42	16	0.003869916141827479
-42	17	0.0333508219111717
-42	18	0.02219412163626913
-42	19	0.016409306596521483
-42	20	0.01737158754131332
-42	21	0.019086145038493808
-42	22	0.019644239970512532
-42	23	0.03937983303985026
-42	24	0.03205843932183273
-42	25	0.042040369028698704
-42	26	0.04202358803253377
-42	27	0.021932164213910033
-42	28	0.028035960484816824
-42	29	0.026029736255928443
-42	30	0.056053693892984105
-42	31	0.05752484311823974
-42	32	0.05672652338192509
-42	33	0.05318710096214957
-42	34	0.07076750739964338
-42	35	0.061880419840664495
-42	36	0.07359884545869728
-42	37	0.07247842882384292
-42	38	0.06760309556650743
-42	39	0.05545913558539622
-42	40	0.055268620010382595
-42	41	0.03045137059233748
-42	42	0.010297580815684769
-42	43	0.007188535292882013
-42	44	0.005498763772771223
-42	45	0.03138434542074702
-42	46	0.027545803524714096
-42	47	0.03784686698161685
-42	48	0.023703097765394553
-42	49	-0.0001244211106315245
-42	50	0.009325785239731895
-41	-50	-0.013665292221377471
-41	-49	-0.0037269098259645733
-41	-48	-0.007647341350773782
-41	-47	-0.004074215138014961
-41	-46	-0.008423691549989223
-41	-45	-0.01507617998459222
-41	-44	-0.013673062093515083
-41	-43	-0.025523118883928716
-41	-42	-0.01905805267402848
-41	-41	-0.02662259802674967
-41	-40	-0.025144328104146716
-41	-39	-0.03094808288459634
-41	-38	-0.016389625391552975
-41	-37	0.004604386172405604
-41	-36	0.0313285429557039
-41	-35	0.03612410880753302
-41	-34	0.02155941690779629
-41	-33	0.022728508371658733
-41	-32	0.040882839971274926
-41	-31	0.040757125094444666
-41	-30	0.0005675793394161279
-41	-29	0.0018207247596643316
-41	-28	-0.017115896274347737
-41	-27	-0.025305814188809436
-41	-26	-0.016621445330267114
-41	-25	-0.025499400368673635
-41	-24	-0.02041945795103602
-41	-23	-0.02215851419492899
-41	-22	-0.016334380263195464
-41	-21	-0.007937156693797031
-41	-20	-0.015839228287519904
-41	-19	0.015720416669167087
-41	-18	0.008959936131803835
-41	-17	0.015507027667334588
-41	-16	0.015093723572634665
-41	-15	0.010700442036159817
-41	-14	0.006895086760847446
-41	-13	0.01845579970612633
-41	-12	-0.000964378817221061
-41	-11	0.002870688366117657
-41	-10	-0.01187032423225403
-41	-9	-0.006182348305399805
-41	-8	0.014888729221195777
-41	-7	0.018161074538852944
-41	-6	0.017994274277452524
-41	-5	0.01318709047026636
-41	-4	0.02833798114442286
-41	-3	0.005404936937433497
-41	-2	0.008434081745943385
-41	-1	0.02219232453542206
-41	0	0.02301758516208925
-41	1	0.026444192852717225
-41	2	0.025136536425346145
-41	3	0.012593259528601478
-41	4	0.016236540368652606
-41	5	0.011506023496262304
-41	6	0.020963337562721437
-41	7	0.022889689605967625
-41	8	0.020484031018674173
-41	9	0.01947726017215282
-41	10	0.02132234641996126
-41	11	0.028515842685068498
-41	12	0.029854574438570813
-41	13	0.023867568048395935
-41	14	0.0024164411089595043
-41	15	-0.0022818847405524302
-41	16	0.01237727832626417
-41	17	0.017125409803621285
-41	18	0.01901588488700798
-41	19	0.017924344918042776
-41	20	0.03386299372208645
-41	21	0.03361200367505514
-41	22	0.028873108746615517
-41	23	0.02074730419549934
-41	24	0.01663960895121687
-41	25	0.028861441377455947
-41	26	0.042511485863766484
-41	27	0.03567631040448037
-41	28	0.041523092151926996
-41	29	0.03853924387617286
-41	30	0.0597771743776565
-41	31	0.06814020636662715
-41	32	0.0651473686692083
-41	33	0.07812185418377161
-41	34	0.08035709819492583
-41	35	0.07830027311068764
-41	36	0.06705986667363772
-41	37	0.07909318200937993
-41	38	0.06274872029266211
-41	39	0.06942779361945094
-41	40	0.03473493519364453
-41	41	0.01844842333913498
-41	42	0.019205110213818304
-41	43	0.015280299332127248
-41	44	0.024360678464736163
-41	45	0.03351324383697018
-41	46	0.02031100811002123
-41	47	0.02778203678019364
-41	48	0.027640994746935498
-41	49	0.013607720658699316
-41	50	0.01361410305250866
-40	-50	0.0026463888381905057
-40	-49	-0.01958660333625457
-40	-48	-0.018044980663904964
-40	-47	-0.014214666696930873
-40	-46	0.00015953444177316736
-40	-45	0.0002779902967646657
-40	-44	-0.00662121716868593
-40	-43	-0.00748292070558664
-40	-42	-0.01048851301572185
-40	-41	-0.03516599929058587
-40	-40	-0.018188544225830657
-40	-39	-0.013749131554898363
-40	-38	-0.008214650185794816
-40	-37	0.019540794293994423
-40	-36	0.043660931562693066
-40	-35	0.024191970248360933
-40	-34	0.01797618456394361
-40	-33	0.01002926615633835
-40	-32	0.026624689815686792
-40	-31	0.03637411128367112
-40	-30	0.016775207218490847
-40	-29	0.010373921431337826
-40	-28	0.0018359709649694897
-40	-27	-0.0052424806709817405
-40	-26	-0.024473378188270965
-40	-25	-0.006501796741179675
-40	-24	-0.019884608204605247
-40	-23	-0.017511809196966415
-40	-22	-0.006324186492386505
-40	-21	0.016753626439336294
-40	-20	0.033005625100967696
-40	-19	0.04243085376771189
-40	-18	0.02462082527776493
-40	-17	0.03262547389257582
-40	-16	0.013618653413717556
-40	-15	0.016262013198288083
-40	-14	0.011478366230692837
-40	-13	0.015054604805155745
-40	-12	0.01715293637080287
-40	-11	-0.0012926127958456306
-40	-10	0.005303115037721124
-40	-9	-0.008124383486853043
-40	-8	0.015265023900195757
-40	-7	0.024797909131103815
-40	-6	0.021162793502616895
-40	-5	0.0024416652827610667
-40	-4	0.0035033872445399366
-40	-3	0.009432564437646864
-40	-2	0.006051831748199829
-40	-1	0.0108625336003482
-40	0	0.01814257932448543
-40	1	0.03128530855031509
-40	2	0.04510176672225438
-40	3	0.021880756749475306
-40	4	0.03246284012050851
-40	5	0.04671467840305965
-40	6	0.04836485814885189
-40	7	0.025286677817824513
-40	8	0.03137197234374075
-40	9	0.020027953563015146
-40	10	0.028486153512683094
-40	11	0.03648648865749371
-40	12	0.04222029580797676
-40	13	0.03207467776876059
-40	14	0.030308549394995887
-40	15	0.009266424111427545
-40	16	-0.006829128215898284
-40	17	0.005916153446983247
-40	18	0.02181025313382614
-40	19	0.03694777882889856
-40	20	0.045471174653246446
-40	21	0.015749582374795793
-40	22	0.02559003114563338
-40	23	0.01363798104158694
-40	24	0.014635962718877883
-40	25	0.033575674088199156
-40	26	0.029545281028799743
-40	27	0.0315433959809545
-40	28	0.04857834811341771
-40	29	0.07008512949292524
-40	30	0.06465131740538961
-40	31	0.08602047179703111
-40	32	0.07204289555227163
-40	33	0.09151137433823073
-40	34	0.09529427528778166
-40	35	0.08300616332498957
-40	36	0.07956713865936804
-40	37	0.06625802171733562
-40	38	0.04667203237209675
-40	39	0.04075303743393578
-40	40	0.03330116030977537
-40	41	0.021664332662486574
-40	42	0.019053919772406988
-40	43	0.02194915712182148
-40	44	0.03587796477803451
-40	45	0.02037979611702767
-40	46	0.011828913862042002
-40	47	0.015725132991359223
-40	48	0.03254955342119798
-40	49	0.032595528666399705
-40	50	0.02816996022423198
-39	-50	0.0022124197044501256
-39	-49	-0.004108712420006934
-39	-48	-0.013703842723268233
-39	-47	-0.004899985854308067
-39	-46	-0.01941871563106027
-39	-45	-0.01556731091792272
-39	-44	-0.014674890423881995
-39	-43	-0.0004873071338204031
-39	-42	-0.0046077420765765886
-39	-41	-0.028147413733753353
-39	-40	-0.026056501489894947
-39	-39	-0.022631826094753667
-39	-38	0.008396806561642194
-39	-37	0.017549538273839815
-39	-36	0.03341372751116207
-39	-35	0.022156784493107345
-39	-34	0.009288983580702773
-39	-33	0.01568808352779919
-39	-32	0.028859018296025878
-39	-31	0.023087205996167256
-39	-30	0.01887272516720219
-39	-29	0.018505194102622816
-39	-28	0.005098740707232916
-39	-27	-0.015145956950230395
-39	-26	-0.012663353809072507
-39	-25	-0.0029188003747346305
-39	-24	-0.011869343203133442
-39	-23	-0.020072695875367717
-39	-22	-0.0029542758880967686
-39	-21	-0.002122406687011373
-39	-20	0.028952735064538545
-39	-19	0.03482887726171744
-39	-18	0.036281390516787804
-39	-17	0.024420165322716878
-39	-16	0.014682858748159387
-39	-15	0.013597313110736323
-39	-14	0.022195800844613898
-39	-13	0.006885420893276559
-39	-12	0.008497906122090847
-39	-11	-0.011354314507333048
-39	-10	-0.014376105236617582
-39	-9	0.008938713713358228
-39	-8	0.009442932896670655
-39	-7	0.0008838014825103852
-39	-6	0.014070076873248679
-39	-5	0.013267068669844341
-39	-4	0.017220551261205346
-39	-3	0.027356187934707826
-39	-2	0.01862252269299986
-39	-1	0.020208245463783827
-39	0	0.028233820432699126
-39	1	0.03178896342044187
-39	2	0.043226626384965175
-39	3	0.050867137223945195
-39	4	0.056549294659628456
-39	5	0.05636400487986241
-39	6	0.07810011473395687
-39	7	0.03961514712438311
-39	8	0.044253113987778356
-39	9	0.027425812603512456
-39	10	0.016228546553070988
-39	11	0.023139509563663584
-39	12	0.036765464209045154
-39	13	0.04761374212184973
-39	14	0.023905232256666416
-39	15	0.02125055839992935
-39	16	0.011414366993137002
-39	17	0.025372099055739106
-39	18	0.02380971487395791
-39	19	0.020634041804470978
-39	20	0.03426651384987918
-39	21	0.025395669536382785
-39	22	0.029279855573864953
-39	23	0.025200091525662896
-39	24	0.021913859601679048
-39	25	0.01888949934069687
-39	26	0.03711554145296977
-39	27	0.03155120378287444
-39	28	0.04071434388736114
-39	29	0.054256659540535754
-39	30	0.07217365587150343
-39	31	0.09657255673509721
-39	32	0.09532212497936528
-39	33	0.10277045067721843
-39	34	0.08222599083673661
-39	35	0.08898131636215927
-39	36	0.05520317896995335
-39	37	0.04224161016424003
-39	38	0.020713238549015366
-39	39	0.02593273633847113
-39	40	0.015062271009350897
-39	41	0.01601275136781468
-39	42	0.023244689863808676
-39	43	0.021295805011484432
-39	44	0.029057174690741008
-39	45	0.035373065114426845
-39	46	0.03106601557656685
-39	47	0.03292286662724278
-39	48	0.027409388985447952
-39	49	0.04235060501645125
-39	50	0.05338415593327458
-38	-50	0.010908190505481346
-38	-49	0.002546393818799031
-38	-48	-0.007122868632568849
-38	-47	-0.0019886451263494346
-38	-46	-0.0036736794084712
-38	-45	-0.011975764947393375
-38	-44	-0.0026755191878027242
-38	-43	-0.010070096768524184
-38	-42	-0.008537665895317204
-38	-41	-0.0259078760851719
-38	-40	-0.018001549455179133
-38	-39	-0.005990878245349049
-38	-38	0.0002678430040401585
-38	-37	0.012948857931893619
-38	-36	0.018331040348062547
-38	-35	0.014049831298828893
-38	-34	0.018427377392041575
-38	-33	0.03225096483259646
-38	-32	0.03632357510470384
-38	-31	0.015356776383857023
-38	-30	0.004147458974318782
-38	-29	0.00397692994455753
-38	-28	0.007955048850810487
-38	-27	-0.021701735240481277
-38	-26	-0.01969599595993962
-38	-25	-0.010976553401637367
-38	-24	-0.012735228650106659
-38	-23	-0.005302774774965508
-38	-22	0.005572192026963184
-38	-21	0.01088452357385288
-38	-20	0.035495921768780005
-38	-19	0.0410795575263653
-38	-18	0.04049120621824341
-38	-17	0.030276491156905356
-38	-16	0.027498579103877933
-38	-15	0.02847356948802409
-38	-14	0.034014165655398276
-38	-13	-0.0017931750528331083
-38	-12	0.020417987470709196
-38	-11	0.011082618723659664
-38	-10	-0.014417931788052922
-38	-9	0.0003227789723824278
-38	-8	0.005056305758073408
-38	-7	0.005541277919321145
-38	-6	0.009212024156280228
-38	-5	0.014641135296224716
-38	-4	0.0302272585915136
-38	-3	0.03280041949409697
-38	-2	0.04382782417862846
-38	-1	0.04579091989246194
-38	0	0.03859580627875335
-38	1	0.036270861176665184
-38	2	0.03801451584440404
-38	3	0.04285866275699033
-38	4	0.05528599685628734
-38	5	0.08591656620775331
-38	6	0.0828453766921105
-38	7	0.049773998591473315
-38	8	0.019970570857829963
-38	9	0.01974155555929864
-38	10	0.022747937765925902
-38	11	0.032108511637580016
-38	12	0.04363451775948205
-38	13	0.038264175116399436
-38	14	0.021360593338237317
-38	15	0.005351463060952491
-38	16	0.035731749121038055
-38	17	0.020689194070114533
-38	18	0.028813337221368963
-38	19	0.03652745382845218
-38	20	0.035384636875803684
-38	21	0.02118326968724967
-38	22	0.020035918254892298
-38	23	0.018657149521978982
-38	24	0.032861340657614424
-38	25	0.03955040555952201
-38	26	0.03436305093432769
-38	27	0.03086300772483917
-38	28	0.05572274104062393
-38	29	0.05873236976615904
-38	30	0.07606183547941729
-38	31	0.08729077282011394
-38	32	0.0910053338187551
-38	33	0.09874526305155538
-38	34	0.08178825498585778
-38	35	0.06187523947808277
-38	36	0.05471928242784427
-38	37	0.042278871493952735
-38	38	0.029324523006450613
-38	39	-0.0017200478076217843
-38	40	0.014535089501533503
-38	41	0.015202749122335334
-38	42	0.008089634872304867
-38	43	0.00019838008257684102
-38	44	0.034739500183623685
-38	45	0.03963698024918405
-38	46	0.04109167703574799
-38	47	0.05566972031611666
-38	48	0.0526572257309007
-38	49	0.0560021777619061
-38	50	0.06976990055679626
-37	-50	0.003240921720265305
-37	-49	-0.0009579277547228374
-37	-48	-0.006798457599644231
-37	-47	-0.010863813159205702
-37	-46	-0.002519442893423389
-37	-45	-0.02057335240137323
-37	-44	-0.024231052014336382
-37	-43	-0.008123758675325122
-37	-42	-0.011181624576852787
-37	-41	-0.021359021647243345
-37	-40	-0.0143757940390612
-37	-39	0.00028808137203865876
-37	-38	0.021937346401196836
-37	-37	0.02125865898338647
-37	-36	0.03436369902865693
-37	-35	0.018399707653892625
-37	-34	0.017091307127364664
-37	-33	0.030701237521907194
-37	-32	0.023223565230583536
-37	-31	0.026493632346805684
-37	-30	0.005195193674343436
-37	-29	0.0016275808131408854
-37	-28	-0.013255096467606057
-37	-27	-0.023314994104453476
-37	-26	-0.016457490035031077
-37	-25	0.0021634474130146283
-37	-24	-0.008961136740706649
-37	-23	0.004717824829446089
-37	-22	0.008936538120396263
-37	-21	0.017716341698803633
-37	-20	0.02552566635707893
-37	-19	0.01998777998522037
-37	-18	0.034907622633717064
-37	-17	0.029425419458533157
-37	-16	0.022962163767151694
-37	-15	0.0395678535997647
-37	-14	0.03362095044128562
-37	-13	-0.0037605077126847673
-37	-12	0.00202492339393925
-37	-11	0.012312276103459956
-37	-10	0.0012627156987076857
-37	-9	0.017508912684255314
-37	-8	0.007261664314896381
-37	-7	0.022762798271997085
-37	-6	0.011477116638029954
-37	-5	0.007219625636709452
-37	-4	0.025718060483594457
-37	-3	0.03708990636203293
-37	-2	0.04424731217103453
-37	-1	0.058128790890129844
-37	0	0.052263047881000044
-37	1	0.04516510317593737
-37	2	0.02137468619386451
-37	3	0.03330727132617214
-37	4	0.041129262486348926
-37	5	0.0520804144145914
-37	6	0.043207322943556434
-37	7	0.024825516844200514
-37	8	0.033554118891396964
-37	9	0.015489405708459868
-37	10	0.016287474749818367
-37	11	0.03380172639672937
-37	12	0.03679961584801347
-37	13	0.02585388103730752
-37	14	0.022101173799306928
-37	15	0.039816219577523404
-37	16	0.0404936524953996
-37	17	0.056668174682180494
-37	18	0.047984558146189044
-37	19	0.05676752186209644
-37	20	0.05183016243367507
-37	21	0.03475418052347153
-37	22	0.025261929458326084
-37	23	0.022148939790004315
-37	24	0.025986209316368174
-37	25	0.03404401586793768
-37	26	0.04203260311361978
-37	27	0.03785600893005295
-37	28	0.03197148247214485
-37	29	0.05294185024303033
-37	30	0.05381815246279045
-37	31	0.05273477387412405
-37	32	0.06606226477225945
-37	33	0.06787020467437618
-37	34	0.05471066638279057
-37	35	0.05461098767163747
-37	36	0.046627680959193715
-37	37	0.03220610658549108
-37	38	0.01687117349829265
-37	39	-0.010401148524822402
-37	40	-0.023919810304374855
-37	41	0.007626780287514388
-37	42	0.010825271311213455
-37	43	0.02785391680568174
-37	44	0.036336249766039025
-37	45	0.05104945413615003
-37	46	0.05839448617421801
-37	47	0.06229927031814411
-37	48	0.06498239556250555
-37	49	0.06000238613264788
-37	50	0.0642543614434411
-36	-50	0.00018286767949478555
-36	-49	0.021066529272871008
-36	-48	-0.0011151256234385825
-36	-47	-0.008196319784220142
-36	-46	0.006497683475472662
-36	-45	-0.005331210224930999
-36	-44	-0.0013588245780732282
-36	-43	-0.00041304217179546064
-36	-42	-0.008480081267700454
-36	-41	-0.017570467239753793
-36	-40	-0.01935742160163854
-36	-39	-0.013162366941547403
-36	-38	0.026383787883089874
-36	-37	0.02208436086010676
-36	-36	0.00819573574340829
-36	-35	0.018817392554720667
-36	-34	0.011503789396382524
-36	-33	0.012434721788885633
-36	-32	0.007021661894491784
-36	-31	0.02094186190589501
-36	-30	0.0065236403424977505
-36	-29	-0.00816838617472286
-36	-28	-0.01403518648883531
-36	-27	-0.010904448235358438
-36	-26	0.0060535788552695605
-36	-25	0.011397318118890564
-36	-24	-0.005189472962545136
-36	-23	0.020725496597469348
-36	-22	0.012275974148654781
-36	-21	0.004521884682350937
-36	-20	0.014851730923222214
-36	-19	0.025203249018709226
-36	-18	0.03803184747468779
-36	-17	0.03296860788715189
-36	-16	0.026711024738134814
-36	-15	0.02275434958086352
-36	-14	0.0230203409283253
-36	-13	0.007593413834680356
-36	-12	0.011254295384239268
-36	-11	0.006044715489144058
-36	-10	0.005759201613442588
-36	-9	0.003974091680583235
-36	-8	0.018148268183179054
-36	-7	0.023460701930475728
-36	-6	0.014355972135955264
-36	-5	0.021389066509501918
-36	-4	0.019092405588871434
-36	-3	0.03223863809739796
-36	-2	0.054256849994471695
-36	-1	0.05309829446269239
-36	0	0.06392550849924608
-36	1	0.06143015328225241
-36	2	0.04634900377744867
-36	3	0.03397291473530203
-36	4	0.04092114688110909
-36	5	0.048694313576782895
-36	6	0.04462266152556575
-36	7	0.02627004762287949
-36	8	0.03142707392196315
-36	9	0.039591109008345116
-36	10	0.025592860427954653
-36	11	0.03135258016024715
-36	12	0.03557751176702551
-36	13	0.03896416173631648
-36	14	0.029617353069290756
-36	15	0.030569020103150202
-36	16	0.0457750938620593
-36	17	0.06943812540749425
-36	18	0.0752107028015599
-36	19	0.07589223722604571
-36	20	0.06072880389339711
-36	21	0.03878897594036515
-36	22	0.0372518106166407
-36	23	0.04010075078280371
-36	24	0.045610551664521985
-36	25	0.03231409490383583
-36	26	0.04641755359959559
-36	27	0.03126329322736572
-36	28	0.03326421713014496
-36	29	0.030535244294769715
-36	30	0.05376888633064733
-36	31	0.05009944144869652
-36	32	0.06052091156917684
-36	33	0.058958983544384294
-36	34	0.05766258330605706
-36	35	0.041920330590007826
-36	36	0.019979070113950736
-36	37	0.016200578972951102
-36	38	0.016579676363680483
-36	39	-0.00615370622282816
-36	40	-0.013185862533731343
-36	41	-0.015162084863595441
-36	42	0.0057747005396108515
-36	43	0.02580862279512613
-36	44	0.05169708165558964
-36	45	0.06350404497717098
-36	46	0.06319085895081225
-36	47	0.05918208745163625
-36	48	0.07087788062356709
-36	49	0.06263445503829869
-36	50	0.06820081613961525
-35	-50	-0.003697755092159319
-35	-49	0.01859259185972876
-35	-48	0.018839520976845305
-35	-47	-0.0014858195677559087
-35	-46	-0.0021796683212296484
-35	-45	-0.0062195491859903165
-35	-44	-0.00021891510581435028
-35	-43	0.003365507787084509
-35	-42	0.009740340642409242
-35	-41	-0.013137409835678727
-35	-40	-0.012824875550656256
-35	-39	-0.0018427988621041462
-35	-38	0.012034946102827782
-35	-37	0.012239462243338002
-35	-36	0.0021827508159295845
-35	-35	-0.002270488895492705
-35	-34	-0.023338711483670255
-35	-33	-0.016841110012050728
-35	-32	-0.002625440523825609
-35	-31	0.023853471169616766
-35	-30	0.011470468746869411
-35	-29	-0.013548289980026784
-35	-28	-0.007740028608727954
-35	-27	0.008803442214341387
-35	-26	0.009546773485864947
-35	-25	0.008910528526056722
-35	-24	0.003652520184931137
-35	-23	-0.004055945081776859
-35	-22	0.019035744780979504
-35	-21	0.005466631843401092
-35	-20	0.021213388432300903
-35	-19	0.026753017898402513
-35	-18	0.038170959992924317
-35	-17	0.019371922046945433
-35	-16	0.013228303178407504
-35	-15	0.02172941909335002
-35	-14	0.01939338324752014
-35	-13	0.018745141474134683
-35	-12	0.028320092317033856
-35	-11	0.015150624754193967
-35	-10	0.016257476681955263
-35	-9	0.0176261105152499
-35	-8	0.03239891658193134
-35	-7	0.012338934471408563
-35	-6	0.031243262818862985
-35	-5	0.00629838689692025
-35	-4	0.019104713745639046
-35	-3	0.007927374405946699
-35	-2	0.041650238151821034
-35	-1	0.05736561164888926
-35	0	0.06264068481846002
-35	1	0.05099589947907699
-35	2	0.054370257835598894
-35	3	0.033626402299159475
-35	4	0.030427282701566572
-35	5	0.047211311633903644
-35	6	0.044068470118373206
-35	7	0.027832588143711916
-35	8	0.03699945810927657
-35	9	0.029276954160141293
-35	10	0.026669504850682934
-35	11	0.03242308754379555
-35	12	0.03399066478000364
-35	13	0.03213208128876971
-35	14	0.01955956379716492
-35	15	0.03522320587530143
-35	16	0.07307274040044563
-35	17	0.0686918251709537
-35	18	0.06904403946229946
-35	19	0.0795995373926086
-35	20	0.054335479332555336
-35	21	0.04918932829100217
-35	22	0.030748597751121962
-35	23	0.03861746190860591
-35	24	0.03320397405124401
-35	25	0.025252051073751423
-35	26	0.03385321727324785
-35	27	0.02936279240304898
-35	28	0.022684425196348244
-35	29	0.031200068823630387
-35	30	0.04157961459187155
-35	31	0.05355784314063698
-35	32	0.04038863974565784
-35	33	0.03825234455927073
-35	34	0.03359386923467128
-35	35	0.02833515709712348
-35	36	0.02349009273215217
-35	37	0.0023655491907254036
-35	38	0.004443903075496175
-35	39	-0.007611228389534249
-35	40	-0.01653991873181938
-35	41	-0.008796343517285024
-35	42	0.020882524723869676
-35	43	0.03860030229533074
-35	44	0.06711557489800955
-35	45	0.07314406567198217
-35	46	0.06374850741178563
-35	47	0.05235018714079506
-35	48	0.0614962045938166
-35	49	0.06311282041392524
-35	50	0.0400734908327668
-34	-50	-0.010624137108692484
-34	-49	0.014824626874771908
-34	-48	0.025343601627332447
-34	-47	0.014604684125433198
-34	-46	-0.00023548904895220318
-34	-45	-0.004333902286192685
-34	-44	-0.011963734313012042
-34	-43	-0.003423344382694329
-34	-42	-0.011026014359093877
-34	-41	-0.0006028398851000172
-34	-40	0.007967168197617135
-34	-39	0.0037118260331670243
-34	-38	0.003880766521074951
-34	-37	-0.015727016843285018
-34	-36	-0.021940405442371576
-34	-35	-0.02563688338106834
-34	-34	-0.04444628711879598
-34	-33	-0.01960324387211058
-34	-32	-0.028151486935612792
-34	-31	-0.009381623437697198
-34	-30	-0.009508531417970914
-34	-29	-0.010737079078736122
-34	-28	-0.002446445572181189
-34	-27	0.004139147719724451
-34	-26	0.006385563344267554
-34	-25	0.016570690258313668
-34	-24	0.0051577895596180414
-34	-23	0.010428814861652178
-34	-22	0.006212618457731452
-34	-21	0.00801469329465439
-34	-20	0.0008587814979106086
-34	-19	0.023910592118494892
-34	-18	0.022141090230501384
-34	-17	0.011095231691252901
-34	-16	0.018234094092162503
-34	-15	0.033709152969144444
-34	-14	0.043644307309519764
-34	-13	0.02549317147064601
-34	-12	0.02186104814968098
-34	-11	0.01511292725982258
-34	-10	0.024817572737336844
-34	-9	0.03180473647457606
-34	-8	0.044769069571723726
-34	-7	0.017171631710633805
-34	-6	0.012742250461207503
-34	-5	0.023707897367419038
-34	-4	0.01974642719617966
-34	-3	0.04064578301457069
-34	-2	0.055172463608948036
-34	-1	0.05882864313606561
-34	0	0.061904395789328784
-34	1	0.058826789926080134
-34	2	0.05313854550408161
-34	3	0.05852577242867063
-34	4	0.03728706214810331
-34	5	0.044399934749912315
-34	6	0.03622892017517602
-34	7	0.019046992748649794
-34	8	-7.312502747595675e-05
-34	9	0.012268872684521929
-34	10	0.02066358641856988
-34	11	0.0256244643758706
-34	12	0.020589445505440746
-34	13	0.0098505374530352
-34	14	0.0139809079454345
-34	15	0.06440546130762274
-34	16	0.06091835001341195
-34	17	0.07180725046531333
-34	18	0.07722777094018957
-34	19	0.06291383363233585
-34	20	0.05339231627483518
-34	21	0.04597268239021492
-34	22	0.039474302499194716
-34	23	0.04497710942179334
-34	24	0.03806815092657609
-34	25	0.02506580943199138
-34	26	0.039426770330380737
-34	27	0.03295059137741346
-34	28	0.024024648871042935
-34	29	0.03231427477363534
-34	30	0.029583760840648492
-34	31	0.04336491070068465
-34	32	0.029054698939479207
-34	33	0.023390483471194233
-34	34	0.0132963857764281
-34	35	0.015858459162253397
-34	36	0.012421140015223701
-34	37	0.0007628008474986406
-34	38	0.01927089301767859
-34	39	0.0069000605833024874
-34	40	0.01622827737183101
-34	41	0.006376366415280605
-34	42	0.028401131880454213
-34	43	0.03465468131823392
-34	44	0.060807842979353134
-34	45	0.05778899484333603
-34	46	0.06377148925181612
-34	47	0.043542905778605014
-34	48	0.04648770274356267
-34	49	0.0633191661987041
-34	50	0.035020506143914665
-33	-50	-0.006551461415843546
-33	-49	0.011707218173347392
-33	-48	0.01575812123375544
-33	-47	-0.011724815367049444
-33	-46	0.000468840255658574
-33	-45	-0.001063609575922585
-33	-44	-0.018877094188774354
-33	-43	-0.012814128649788401
-33	-42	-0.01005063327189418
-33	-41	-0.010658227922807474
-33	-40	-0.00044121962705535146
-33	-39	-0.004705813352726564
-33	-38	-0.0020577198098967976
-33	-37	-0.004080125915573883
-33	-36	-0.024614662845693882
-33	-35	-0.045196354286585035
-33	-34	-0.03950417791222179
-33	-33	-0.04152385328150297
-33	-32	-0.042400055872550205
-33	-31	-0.03520664752448243
-33	-30	-0.0302761174311087
-33	-29	-0.009706839310079575
-33	-28	-0.011619936300688527
-33	-27	-0.005305781300904854
-33	-26	0.006324296596951889
-33	-25	0.007485812136075303
-33	-24	0.011363360610053875
-33	-23	-0.005600296294967024
-33	-22	0.01480982691338337
-33	-21	0.018491703584999027
-33	-20	0.007411573689841201
-33	-19	0.02693237779268561
-33	-18	0.010297927391590534
-33	-17	0.022202731208267563
-33	-16	0.02512553110922927
-33	-15	0.04040132223152165
-33	-14	0.027577451919312497
-33	-13	0.0376099084423427
-33	-12	0.027970904438554628
-33	-11	0.02610358289527942
-33	-10	0.03332419232304945
-33	-9	0.043115708754599656
-33	-8	0.03994982031572868
-33	-7	0.030440676275217845
-33	-6	0.020217218386814142
-33	-5	0.029998282596271332
-33	-4	0.04118780887125907
-33	-3	0.03385886703797957
-33	-2	0.035209176342242236
-33	-1	0.055725439076214675
-33	0	0.054392805159335283
-33	1	0.07690043534745349
-33	2	0.053803685222276396
-33	3	0.07014613031663401
-33	4	0.055309537524093934
-33	5	0.03956505996937597
-33	6	0.02010624694416245
-33	7	0.0036671336801128783
-33	8	-0.0065570945996246705
-33	9	0.000644010729602304
-33	10	-0.0004760065359923307
-33	11	0.00744149898115678
-33	12	0.013641755199868938
-33	13	0.020927253817028445
-33	14	0.02274944860167004
-33	15	0.04564328796504108
-33	16	0.06880992012278175
-33	17	0.0647864137575737
-33	18	0.060189323388334486
-33	19	0.05606155753783083
-33	20	0.05094902883456058
-33	21	0.05874978940377762
-33	22	0.055025321821729145
-33	23	0.05012661845650911
-33	24	0.023633291051119595
-33	25	0.012568709300363586
-33	26	0.021309622887311995
-33	27	0.01946577894161044
-33	28	0.027972094902006
-33	29	0.019952612177608905
-33	30	0.032288965275689044
-33	31	0.03729215674260762
-33	32	0.020426575436158986
-33	33	0.006556812882802068
-33	34	0.012145093841330768
-33	35	0.015279618075490317
-33	36	0.001285372732779087
-33	37	0.009513905347376264
-33	38	0.011776095804730815
-33	39	0.0228931846530073
-33	40	0.013216788404419115
-33	41	0.022420657883471237
-33	42	0.022902891129590857
-33	43	0.022890344510382167
-33	44	0.03062639648385318
-33	45	0.04787873061705281
-33	46	0.04781183658527023
-33	47	0.036298347204046996
-33	48	0.045001066144332545
-33	49	0.04841535940945709
-33	50	0.02369458528243243
-32	-50	0.0119654775558285
-32	-49	0.0157359764334473
-32	-48	0.012023383618866831
-32	-47	-0.007908341260329738
-32	-46	0.0030354882459248155
-32	-45	-0.011130698307681748
-32	-44	-0.010587419606236085
-32	-43	0.0007845261385182818
-32	-42	0.007543165340824599
-32	-41	0.009873713825864255
-32	-40	-0.008849253506949336
-32	-39	0.008129434857419002
-32	-38	0.004695377977705388
-32	-37	-0.01176668929497786
-32	-36	-0.03125645434732138
-32	-35	-0.03254771773967871
-32	-34	-0.028416992893888784
-32	-33	-0.01934047098971487
-32	-32	-0.03898358631730634
-32	-31	-0.04480976480950853
-32	-30	-0.03043838372152577
-32	-29	-0.02655911215171541
-32	-28	-0.010348195839197178
-32	-27	9.647350790339291e-05
-32	-26	0.01762922129226955
-32	-25	0.0020270121021542377
-32	-24	0.026582790662023254
-32	-23	0.008770473300900429
-32	-22	0.011529542342885496
-32	-21	0.027385311196212035
-32	-20	-0.0020919514595141952
-32	-19	0.006173765343190485
-32	-18	0.0024412235557509186
-32	-17	0.021582639895689735
-32	-16	0.02565277343711497
-32	-15	0.03383158874461733
-32	-14	0.04013708950741337
-32	-13	0.03430792926574235
-32	-12	0.023040487231219133
-32	-11	0.030128538298481198
-32	-10	0.033935783519827206
-32	-9	0.046147432923188375
-32	-8	0.05656701522219911
-32	-7	0.0395086028167053
-32	-6	0.060196426148818094
-32	-5	0.04905218890737559
-32	-4	0.04289688924938665
-32	-3	0.04818918819677983
-32	-2	0.048084662257337527
-32	-1	0.0725477268343843
-32	0	0.06916670142980146
-32	1	0.06523975177579212
-32	2	0.06125851980033912
-32	3	0.05064314884486852
-32	4	0.059639147417959004
-32	5	0.054211780006276064
-32	6	0.03467760796465242
-32	7	0.001934370023174599
-32	8	-0.003974975046394474
-32	9	0.004535237085676469
-32	10	0.0022665129585292096
-32	11	-0.009875779028661965
-32	12	-0.005624702110398597
-32	13	0.0026984298284433218
-32	14	0.01557282553937805
-32	15	0.0541912524964533
-32	16	0.05645780493722785
-32	17	0.06759646782946087
-32	18	0.07897226055507317
-32	19	0.07124131728938425
-32	20	0.05897012725704545
-32	21	0.05845473003589714
-32	22	0.06294091655294573
-32	23	0.05665064487851012
-32	24	0.02991749390367911
-32	25	0.019655604034753464
-32	26	0.008013667292843224
-32	27	0.018405803783669218
-32	28	0.014049680287114013
-32	29	0.013949625941267271
-32	30	0.024501229021012632
-32	31	0.013393668562606566
-32	32	0.009994018414588276
-32	33	-0.005526924703979443
-32	34	0.014648376648875375
-32	35	0.012275938014263845
-32	36	0.0323769315542195
-32	37	0.017458672188905608
-32	38	0.015302968241547265
-32	39	0.020773445837572655
-32	40	0.014022975497464542
-32	41	0.028001022123481725
-32	42	0.04119507134823126
-32	43	0.029288922080126477
-32	44	0.04686069572994883
-32	45	0.020474253977589625
-32	46	0.013639995359173832
-32	47	0.011455714808658882
-32	48	0.02406010363132232
-32	49	0.05128028111152307
-32	50	0.037671242055577356
-31	-50	0.00881710578071195
-31	-49	0.018020816671454026
-31	-48	0.009216727672286078
-31	-47	-0.0010099534178599748
-31	-46	-0.0025531094699749375
-31	-45	-0.008806381860693662
-31	-44	-0.013662539191100371
-31	-43	-0.004160947754314664
-31	-42	0.0058712650479667465
-31	-41	0.0065338584876382015
-31	-40	-0.0075975630663077205
-31	-39	-0.016996007533203395
-31	-38	-0.012163827360579733
-31	-37	-0.004015797632793382
-31	-36	-0.014594290370314442
-31	-35	-0.027210467302829968
-31	-34	-0.017719081764097738
-31	-33	-0.02988310792360749
-31	-32	-0.03277549608793416
-31	-31	-0.03926504297178718
-31	-30	-0.030821725861221252
-31	-29	-0.04430559389868787
-31	-28	-0.0005340366591674939
-31	-27	0.005478530647348167
-31	-26	0.01445751437027046
-31	-25	0.017991224484272185
-31	-24	0.012347436688675432
-31	-23	0.011251008097128546
-31	-22	0.014206798150748157
-31	-21	0.01602473996997307
-31	-20	-0.0022722158323893625
-31	-19	-0.0007748582620994712
-31	-18	-0.004832910736348373
-31	-17	0.014245506429639896
-31	-16	0.013968091767793083
-31	-15	0.02263976415879976
-31	-14	0.011566276473584528
-31	-13	0.035507604007417544
-31	-12	0.03179289879545459
-31	-11	0.02714632731238254
-31	-10	0.03820289323576843
-31	-9	0.051201823668753886
-31	-8	0.05305301405492657
-31	-7	0.03806197855388404
-31	-6	0.044246048310697804
-31	-5	0.0569520288668878
-31	-4	0.049072404872656045
-31	-3	0.03324030326037622
-31	-2	0.040476360207697196
-31	-1	0.0564547539702084
-31	0	0.06995744837256955
-31	1	0.06645408440310058
-31	2	0.08017766575487643
-31	3	0.053132793970831045
-31	4	0.0696775556185866
-31	5	0.04936798358864796
-31	6	0.036045824673123214
-31	7	0.032505128620289786
-31	8	0.01910539794473141
-31	9	0.014718217969331737
-31	10	0.00021358890839181602
-31	11	0.0021865192763997924
-31	12	0.01266532125731557
-31	13	0.011758033924077833
-31	14	0.02069634621641652
-31	15	0.03123521373604459
-31	16	0.06320138240859921
-31	17	0.08462690975236746
-31	18	0.07909918272460224
-31	19	0.08480112418443693
-31	20	0.057717324306317146
-31	21	0.05732411669632801
-31	22	0.07263478562766361
-31	23	0.05785735209439764
-31	24	0.04547699606225126
-31	25	0.04098844704272086
-31	26	0.00037669249802873206
-31	27	-0.0022853734550676514
-31	28	0.011711593341644167
-31	29	0.00333186107382572
[truncated: 8,202 more rows]
